# Supplementary material for: Palladium-catalyzed asymmetric [3 + 2] cycloaddition of vinyl aziridines and α,β-unsaturated imines generated in situ from aryl sulfonyl indoles
Source: Royal Society of Chemistry journal article supplement (doi:10.1039/d1qo00408e), 2021-01-01
Supplement: d1qo00408e1.pdf [file d1qo00408e1.pdf]

## Supporting Information

### Palladium-Catalyzed Asymmetric [3+2] Cycloaddition of Vinyl Aziridines and $\alpha$ , $\beta$ -Unsaturated Imines Generated *in situ* from Aryl Sulfonyl Indoles

Shan Xiao,<sup>a</sup> Bo Chen,<sup>a</sup> Qin Jiang,<sup>a</sup> Long He,<sup>b</sup> Wen-Dao Chu,<sup>\*a</sup> Cheng-Yu He,<sup>\*a</sup>  
Quan-Zhong Liu<sup>\*a</sup>

<sup>a</sup>Chemical Synthesis and Pollution Control Key Laboratory of Sichuan Province, College of Chemistry  
and Chemical Engineering, China West Normal University, Nanchong 637002, China

<sup>b</sup>College of Chemistry and Materials Engineering, Guiyang University, Guiyang 550005, China

### Table of Contents

|                                                                 |     |
|-----------------------------------------------------------------|-----|
| 1. General information.....                                     | S2  |
| 2. Asymmetric formal [3+2] cycloadditions.....                  | S3  |
| 3.1. Products <b>3a</b> - <b>3z</b> in Scheme 2.....            | S3  |
| 3.2. The Compound <b>4</b> and <b>5</b> in Scheme 3.....        | S17 |
| 4. References.....                                              | S18 |
| 5. NMR spectra of the products.....                             | S19 |
| 6. HPLC spectra of the products.....                            | S48 |
| 7. X-ray crystallographic data of <b>3b</b> and <b>5a</b> ..... | S76 |

## 1. General information

All reactions were carried out under an atmosphere of argon using standard Schlenk techniques. Solvents used in the reactions were distilled from appropriate drying agents prior to use. The sulfonyl indoles **1a-1x**<sup>1</sup>, **1y**<sup>2</sup>, **1z**<sup>1</sup> and vinyl aziridine **2**<sup>3</sup> were prepared according to the literature procedures. If not noted, catalysts **4a-f** and other chemicals were commercially available and used without further purification.

<sup>1</sup>H NMR and <sup>13</sup>C NMR spectra were recorded respectively at 400 MHz and 100 MHz. Chemical shifts were reported in parts per million (ppm) down field from TMS with the solvent resonance as the internal standard. Coupling constants (*J*) are reported in Hz and refer to apparent peak multiplications. Optical rotations were measured in the indicated solvents on Perkin Elmer polarimeter (Polartronic MH8) with a 10 cm cell (*c* given in g/100 mL). Flash column chromatography was performed using 200-300 mesh silica gel. Enantiomeric excess (*ee*) were determined by HPLC analysis on a Shimadzu LC-20A, using Daicel Chiracel IC columns. Electrospray ionization high-resolution mass spectra (ESI-HRMS) were recorded on a Bruker P-SIMS-Gly FT-ICR mass spectrometer. The relative and absolute configuration of **3b** were assigned by the X-ray analysis and the configurations of other cycloaddition products were assigned by analogy.

## 2. Asymmetric formal [3+2] cycloadditions

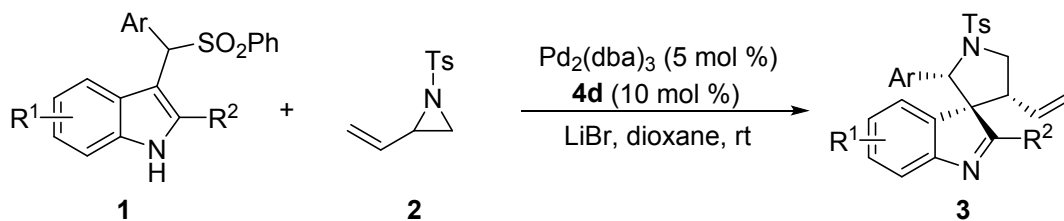

To a dried tube filled with sulfonyl indole **1** (0.1 mmol), Pd<sub>2</sub>(dba)<sub>3</sub> (5 mol %), LiBr (0.3 mmol) and (S)-(-)-XylBINAP (10 mol %) was added a solution of vinyl aziridine **2** (0.3 mmol) in 1,4-dioxane (2 mL). The reaction mixture was stirred under an atmosphere of argon at 25 °C. Upon completion of the reaction, distilled water was added dropwise to quench the reaction. The resulting solution was extracted with ethyl acetate (3 × 3 mL). The combined organic extracts were dried over anhydrous Na<sub>2</sub>SO<sub>4</sub>, and the filtrate was concentrated under reduced pressure. The residue was purified by flash column chromatography on silica gel eluting with petroleum ether and ethyl acetate (petroleum ether/ethyl acetate = 2:1) to give the corresponding product **3**.

### 3.1. Products 3a - 3z in Scheme 2.

#### (2'S,3S,4'R)-2-methyl-2'-phenyl-1'-tosyl-4'-vinylspiro[indole-3,3'-pyrrolidine] (3a)

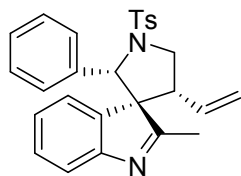

White solid, yield 72%. R<sub>f</sub> = 0.3 (petroleum ether/ethyl acetate = 2:1), dr = 7:1, mp = 182.0 -183.4 °C, [α]<sub>D</sub><sup>20</sup> = +19.8 (c = 0.1, THF), 97% ee, determined by HPLC analysis (chiral IC column, 20% IPA in hexane, rate: 1.0 mL/min, 254 nm). Retention time: t (minor) = 25.1 min, t (major) = 28.3 min. <sup>1</sup>H NMR (400 MHz, CDCl<sub>3</sub>, ppm) δ 7.81 (d, J = 8.2 Hz, 2H), 7.40 (d, J = 8.0 Hz, 2H), 7.27-7.22 (m, 2H), 7.10 (t, J = 7.3 Hz, 1H), 7.02 -6.88 (m, 6H), 5.11 (s, 1H), 4.89-4.68 (m, 3H), 4.18 (dd, J = 12.1, 7.9 Hz, 1H), 3.97 (t, J = 11.9 Hz, 1H), 2.85-2.67 (m, 1H), 2.48 (s, 3H), 2.25 (s, 3H). <sup>13</sup>C NMR (100 MHz, CDCl<sub>3</sub>, ppm) δ 178.4, 154.6, 144.4, 136.2, 135.4, 133.9, 130.8, 129.9, 128.4, 128.1, 127.5, 127.4, 126.0, 125.0, 124.7, 120.0, 119.0, 73.3, 67.9, 53.1, 49.1, 21.7, 15.8. HRMS (ESI): calcd for C<sub>27</sub>H<sub>26</sub>N<sub>2</sub>O<sub>2</sub>S [M+H]<sup>+</sup> 443.1788, found 443.1791.

**(2'S,3S,4'R)-2-methyl-2'-(*o*-tolyl)-1'-tosyl-4'-vinylspiro[indole-3,3'-pyrrolidine]**

**(3b)**

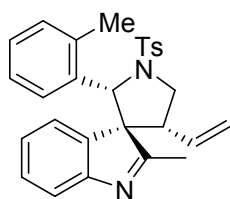

White solid, yield 73%.  $R_f = 0.3$  (petroleum ether/ethyl acetate = 2:1), dr = 6:1, mp = 173.6-175.5 °C.  $[\alpha]_D^{20} = -28.2$  (c = 0.1, THF), 96% *ee*, determined by HPLC analysis (chiral IC column, 20% IPA in hexane, rate: 1.0 mL/min, 210 nm). Retention time: t (minor) = 20.6 min, t (major) = 24.6 min. **<sup>1</sup>H NMR** (400 MHz, CDCl<sub>3</sub>, ppm) δ 7.78 (d,  $J = 8.2$  Hz, 2H), 7.46 (d,  $J = 7.4$  Hz, 2H), 7.40 - 7.29 (m, 3H), 7.11 (t,  $J = 7.3$  Hz, 1H), 7.04-6.84 (m, 4H), 6.77 (m, 1H), 5.55 (s, 1H), 4.88 - 4.75 (m, 1H), 4.34 (dd,  $J = 12.0$ , 7.4 Hz, 1H), 3.95 (t,  $J = 11.6$  Hz, 1H), 2.98- 2.93 (m, 3H), 2.48 (s, 2H), 2.26 (s, 3H), 1.92 (s, 3H). **<sup>13</sup>C NMR** (100 MHz, CDCl<sub>3</sub>, ppm) δ 1180.7, 154.7, 144.1, 136.0, 135.5, 134.2, 131.2, 130.1, 129.8, 128.2, 128.0, 127.7, 127.1, 125.7, 124.9, 124.3, 120.0, 118.7, 72.3, 63.9, 53.0, 50.6, 21.6, 19.2, 16.0. **HRMS (ESI)**: calcd for C<sub>28</sub>H<sub>28</sub>N<sub>2</sub>O<sub>2</sub>S [M+H]<sup>+</sup> 457.1944, found 457.1949.

**(2'R,3S,4'R)-2'-(2-methoxyphenyl)-2-methyl-1'-tosyl-4'-vinylspiro[indole-3,3'-pyrrolidine] (3c)**

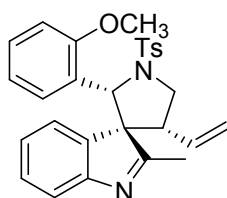

White solid, yield 80%.  $R_f = 0.3$  (petroleum ether/ethyl acetate = 2:1), dr = 8:1, mp = 171.5-173.2 °C.  $[\alpha]_D^{20} = +21.15$  (c = 0.1, THF), 94% *ee*, determined by HPLC analysis (chiral IC column, 20% IPA in hexane, rate: 1.0 mL/min, 210 nm). Retention time: t (minor) = 23.1 min, t (major) = 25.1 min. **<sup>1</sup>H NMR** (400 MHz, CDCl<sub>3</sub>, ppm) δ 7.89 (d,  $J = 7.2$  Hz, 2H), 7.65 (d,  $J = 6.9$  Hz, 1H), 7.44-7.42 (m, 1H), 7.27 - 6.73 (m, 3H), 6.42 - 6.40 (m, 1H), 5.54 (s, 1H), 4.88 - 4.54 (m, 3H), 4.31 - 4.08 (m, 1H), 3.90 (t,  $J = 12.0$  Hz, 1H), 3.42 (s, 3H), 2.69 - 2.54 (m, 1H), 2.50 (s, 3H), 2.10 (s, 2H). **<sup>13</sup>C NMR** (100 MHz, CDCl<sub>3</sub>, ppm) δ 181.0, 155.7, 154.8, 144.3, 135.9, 134.5, 130.5, 130.0, 128.1, 128.0, 127.9, 126.5, 124.7, 124.1, 119.7, 119.5, 118.6, 109.2, 72.0, 62.9, 54.3, 52.9, 50.1, 21.7, 15.4. **HRMS (ESI)**: calcd for C<sub>28</sub>H<sub>28</sub>N<sub>2</sub>O<sub>3</sub>S [M+H]<sup>+</sup> 473.1893, found 473.1893.

**(2'R,3S,4'R)-2'-(2-chlorophenyl)-2-methyl-1'-tosyl-4'-vinylspiro[indole-3,3'-pyrrolidine] (3d)**

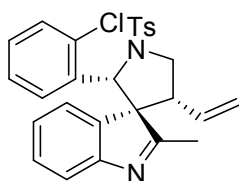

White solid, yield 65%.  $R_f = 0.3$  (petroleum ether/ethyl acetate = 2:1), dr = 6:1, mp = 181.5-184.9°C.  $[\alpha]_D^{20} = -63.8$  (c = 0.1, THF) 86% ee, determined by HPLC analysis (chiral IC column, 20% IPA in hexane, rate: 1.0 mL/min, 210 nm).

Retention time: t (minor) = 20.3 min, t (major) = 22.3 min.  **$^1\text{H NMR}$**  (400 MHz,  $\text{CDCl}_3$ , ppm)  $\delta$  7.86 (d,  $J = 8.1$  Hz, 2H), 7.66 (d,  $J = 7.7$  Hz, 1H), 7.44-7.42 (m, 2H), 7.29-7.25 (m, 1H), 7.17-7.10 (m, 2H), 7.05-6.92 (m, 4H), 5.58 (s, 1H), 4.89- 4.70 (m, 3H), 4.23 (dd,  $J = 12.3, 7.6$  Hz, 1H), 4.00 (t,  $J = 12.0$  Hz, 1H), 2.77-2.70 (m, 1H), 2.50 (s, 3H), 2.17 (s, 3H).  **$^{13}\text{C NMR}$**  (100 MHz,  $\text{CDCl}_3$ , ppm)  $\delta$  180.0, 155.0, 144.5, 135.1, 134.8, 134.0, 131.6, 130.5, 130.3, 130.1, 129.0, 128.6, 128.4, 128.1, 125.7, 125.2, 124.3, 120.2, 119.1, 72.2, 64.4, 53.1, 49.9, 21.7, 16.3. **HRMS (ESI)**: calcd for  $\text{C}_{27}\text{H}_{25}\text{ClN}_2\text{O}_2\text{S}$   $[\text{M}+\text{H}]^+$  477.1398, found 477.1400.

**(2'R,3S,4'R)-2'-(2-bromophenyl)-2-methyl-1'-tosyl-4'-vinylspiro[indole-3,3'-pyrrolidine] (3e)**

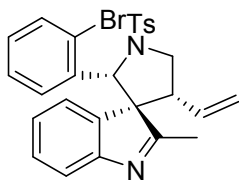

White solid, yield 64%.  $R_f = 0.3$  (petroleum ether/ethyl acetate = 2:1), dr = 5:1, mp = 162.8-164.6 °C.  $[\alpha]_D^{20} = +36.2$  (c = 0.1, THF), 90% ee, determined by HPLC analysis (chiral IC column, 20% IPA in hexane, rate: 1.0 mL/min, 210 nm). Retention time:

t (minor) = 24.3 min, t (major) = 28.1 min.  **$^1\text{H NMR}$**  (400 MHz,  $\text{CDCl}_3$ , ppm)  $\delta$  7.89 (d,  $J = 7.5$  Hz, 2H), 7.65 (d,  $J = 7.5$  Hz, 1H), 7.45-7.43 (m, 2H), 7.34-7.25 (m, 1H), 7.23-7.04 (m, 4H), 6.99-6.83 (m, 2H), 5.56 (s, 1H), 4.88 -4.71 (m, 3H), 4.27 (dd,  $J = 11.7, 7.7$  Hz, 1H), 4.02 (t,  $J = 11.8$  Hz, 1H), 2.83-2.73 (m, 1H), 2.51 (s, 3H), 2.21 (s, 3H).  **$^{13}\text{C NMR}$**  (100 MHz,  $\text{CDCl}_3$ , ppm)  $\delta$  180.3, 155.1, 144.5, 136.9, 134.8, 134.1, 132.3, 130.73, 130.66, 130.1, 129.0, 128.4, 128.1, 126.3, 125.4, 124.2, 121.7, 120.1, 119.0, 72.1, 66.3, 53.2, 49.9, 21.7, 16.9. **HRMS (ESI)**: calcd for  $\text{C}_{27}\text{H}_{25}\text{BrN}_2\text{O}_2\text{S}$   $[\text{M}+\text{H}]^+$  521.0893, found 521.0892.

**(2'S,3S,4'R)-2-methyl-1'-tosyl-2'-(2-(trifluoromethyl)phenyl)-4'-vinylspiro[indole-3,3'-pyrrolidine] (3f)**

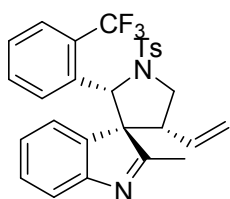

White solid, yield 65%.  $R_f = 0.3$  (petroleum ether/ethyl acetate = 2:1), dr = 8:1, mp = 119.5-120.4°C.  $[\alpha]_D^{20} = +14.7$  (c = 0.1, THF), 84% ee, determined by HPLC analysis (chiral IC column, 20% IPA in hexane, rate: 1.0 mL/min, 210 nm). Retention time: t (minor) = 15.7 min, t (major) = 19.7 min. **<sup>1</sup>H NMR** (400 MHz, CDCl<sub>3</sub>, ppm) δ 7.99 (d,  $J = 6.8$  Hz, 1H), 7.85 (d,  $J = 6.4$  Hz, 2H), 7.51-7.29 (m, 5H), 7.20-7.06 (m, 1H), 6.95-6.85 (m, 1H), 5.65 (s, 1H), 4.85-4.72 (m, 3H), 4.35-4.25 (m, 1H), 4.06 (t,  $J = 11.2$  Hz, 1H), 2.80-2.69 (m, 1H), 2.50 (s, 3H), 2.01 (s, 3H). **<sup>13</sup>C NMR** (100 MHz, CDCl<sub>3</sub>, ppm) δ 178.0, 155.0, 144.5, 136.8, 134.6, 134.5, 131.0, 130.9, 130.8, 130.1, 128.4, 127.8, 127.7, 126.6 (q,  $J = 30.2$  Hz), 125.9 (q,  $J = 6$  Hz), 125.8, 124.0 (q,  $J = 272.0$  Hz), 120.1, 119.0, 72.6, 62.7, 53.2, 50.3, 21.6, 15.7. **HRMS (ESI)**: calcd for C<sub>28</sub>H<sub>25</sub>F<sub>3</sub>N<sub>2</sub>O<sub>2</sub>S [M+H]<sup>+</sup> 511.1662, found 511.1663.

**(2'S,3S,4'R)-2-methyl-2'-(m-tolyl)-1'-tosyl-4'-vinylspiro[indole-3,3'-pyrrolidine] (3g)**

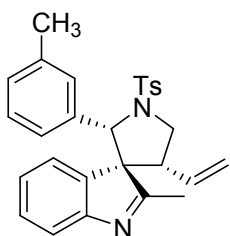

White solid, yield 78%.  $R_f = 0.3$  (petroleum ether/ethyl acetate = 2:1), dr = 9:1, mp = 168.8-170.0°C.  $[\alpha]_D^{20} = +21.4$  (c = 0.1, THF), 92% ee, determined by HPLC analysis (chiral IC column, 20% IPA in hexane, rate: 1.0 mL/min, 210 nm). Retention time: t (minor) = 22.2 min, t (major) = 24.2 min. **<sup>1</sup>H NMR** (400 MHz, CDCl<sub>3</sub>, ppm) δ 7.81 (d,  $J = 8.1$  Hz, 2H), 7.40 (d,  $J = 8.0$  Hz, 2H), 7.27-7.25 (m, 2H), 7.12 (t,  $J = 7.4$  Hz, 1H), 7.03-6.99 (m, 1H), 6.91-6.67 (m, 4H), 5.12 (s, 1H), 4.89 - 4.72 (m, 3H), 4.22 (dd,  $J = 12.1, 7.9$  Hz, 1H), 3.98 (t,  $J = 11.8$  Hz, 1H), 2.83-2.77 (m, 1H), 2.49 (s, 3H), 2.28 (s, 3H), 2.09 (s, 3H). **<sup>13</sup>C NMR** (100 MHz, CDCl<sub>3</sub>, ppm) δ 178.5, 154.6, 144.3, 136.8, 135.9, 135.5, 134.2, 130.9, 129.8, 128.3, 128.2, 128.0, 127.3, 126.8, 125.0, 124.5, 123.2, 120.0, 118.9, 73.3, 67.9, 53.0, 49.1, 21.6, 21.3, 15.8. **HRMS (ESI)**: calcd for C<sub>28</sub>H<sub>28</sub>N<sub>2</sub>O<sub>2</sub>S [M+H]<sup>+</sup> 457.1944, found 457.1942.

**(2'S,3S,4'R)-2'-(3-methoxyphenyl)-2-methyl-1'-tosyl-4'-vinylspiro[indole-3,3'-pyrrolidine] (3h)**

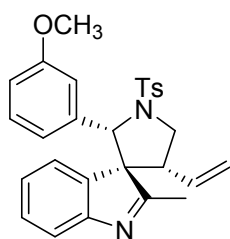

White solid, yield 78%.  $R_f$  = 0.3 (petroleum ether/ethyl acetate = 2:1), dr = 7:1, mp = 161.4-162.8°C.  $[\alpha]_D^{20}$  = -23.6 (c = 0.1, THF), 91% *ee*, determined by HPLC analysis (chiral IC column, 20% IPA in hexane, rate: 1.0 mL/min, 210 nm). Retention time: t (minor) = 28.9 min, t (major) = 34.8 min. **<sup>1</sup>H NMR** (400 MHz, CDCl<sub>3</sub>, ppm) δ 7.81 (d, *J* = 8.1 Hz, 1H), 7.40 (d, *J* = 8.1 Hz, 2H), 7.31 (s, 1H), 7.27 (s, 1H), 7.15 (t, *J* = 7.5 Hz, 1H), 7.03 (t, *J* = 7.4 Hz, 1H), 6.90 (t, *J* = 7.9 Hz, 1H), 6.64 - 6.45 (m, 3H), 5.11 (s, 1H), 4.91 - 4.68 (m, 3H), 4.22 (dd, *J* = 12.1, 7.9 Hz, 1H), 3.98 (t, *J* = 11.8 Hz, 1H), 3.58 (s, 3H), 2.87 - 2.74 (m, 1H), 2.50 (s, 3H), 2.27 (s, 3H). **<sup>13</sup>C NMR** (100 MHz, CDCl<sub>3</sub>, ppm) δ 178.5, 158.7, 154.6, 144.4, 137.6, 135.5, 134.1, 130.8, 129.9, 128.5, 128.0, 124.9, 124.7, 120.1, 119.0, 118.5, 113.3, 111.9, 73.2, 67.8, 55.0, 53.0, 49.0, 21.7, 15.8. **HRMS (ESI)**: calcd for C<sub>28</sub>H<sub>28</sub>N<sub>2</sub>O<sub>3</sub>S [M+H]<sup>+</sup> 473.1893, found 473.1893.

**(2'S,3S,4'R)-2'-(3-chlorophenyl)-2-methyl-1'-tosyl-4'-vinylspiro[indole-3,3'-pyrrolidine] (3i)**

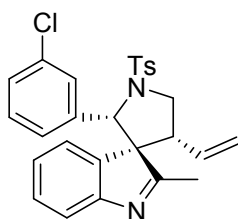

White solid, yield 76%.  $R_f$  = 0.3 (petroleum ether/ethyl acetate = 2:1), dr = 6:1, mp = 132.4-135.9°C.  $[\alpha]_D^{20}$  = -31.8 (c = 0.1, THF), 84% *ee*, determined by HPLC analysis (chiral IC column, 20% IPA in hexane, rate: 1.0 mL/min, 210 nm). Retention time: t (minor) = 17.8 min, t (major) = 20.4 min. **<sup>1</sup>H NMR** (400 MHz, CDCl<sub>3</sub>, ppm) δ 7.78 (d, *J* = 8.1 Hz, 2H), 7.39 (d, *J* = 7.9 Hz, 2H), 7.32-7.20 (m, 2H), 7.14 (t, *J* = 7.5 Hz, 2H), 7.05-7.01 (m, 1H), 6.96 (s, 1H), 6.92-6.80 (m, 3H), 5.10 (s, 1H), 4.91-4.67 (m, 3H), 4.21 (dd, *J* = 12.0, 7.9 Hz, 1H), 3.95 (t, *J* = 11.8 Hz, 1H), 2.89-2.75 (m, 1H), 2.48 (s, 3H), 2.26 (s, 3H). **<sup>13</sup>C NMR** (100 MHz, CDCl<sub>3</sub>, ppm) δ 178.1, 154.6, 144.6, 138.3, 135.0, 133.0, 133.5, 130.6, 130.0, 128.8, 128.6, 128.0, 127.6, 126.4, 124.9, 124.8, 124.1, 120.3, 119.1, 73.2, 67.2, 53.0, 49.1, 21.6, 15.7. **HRMS (ESI)**: calcd for C<sub>27</sub>H<sub>25</sub>ClN<sub>2</sub>O<sub>2</sub>S [M+H]<sup>+</sup> 477.1398, found

477.1399.

**(2'S,3S,4'R)-2-methyl-1'-tosyl-2'-(3-(trifluoromethyl)phenyl)-4'-vinylspiro[indole-3,3'-pyrrolidine] (3j)**

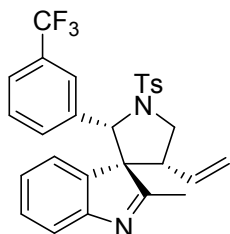

White solid, yield 75%.  $R_f = 0.3$  (petroleum ether/ethyl acetate = 2:1), dr = 8:1, mp = 130.1-132.7°C.  $[\alpha]_D^{20} = +12.7$  (c = 0.1, THF), 86% ee, determined by HPLC analysis (chiral IC column, 20% IPA in hexane, rate: 1.0 mL/min, 210 nm). Retention time: t (minor) = 10.5 min, t (major) = 11.3 min.  **$^1\text{H NMR}$**  (400 MHz,  $\text{CDCl}_3$ , ppm)  $\delta$  7.78 (d,  $J = 8.2$  Hz, 2H), 7.39 (d,  $J = 8.1$  Hz, 2H), 7.25-7.20 (m, 4H), 7.16 - 6.98 (m, 4H), 5.21 (s, 1H), 4.94 - 4.76 (m, 3H), 4.28 (dd,  $J = 12.0, 8.0$  Hz, 1H), 3.98 (t,  $J = 11.8$  Hz, 1H), 2.93 (m, 1H), 2.49 (s, 3H), 2.32 (s, 3H).  **$^{13}\text{C NMR}$**  (100 MHz,  $\text{CDCl}_3$ , ppm)  $\delta$  177.9, 154.5, 144.7, 137.3, 134.9, 134.1, 130.6, 130.0, 129.7 (q,  $J = 32.0$  Hz), 129.1, 128.7, 128.0, 124.9, 124.7, 124.2 (q,  $J = 3.0$  Hz), 123.8 (q,  $J = 271.0$  Hz), 123.2, 120.3, 119.2, 73.2, 67.4, 53.0, 49.1, 21.6, 15.8. **HRMS (ESI)**: calcd for  $\text{C}_{28}\text{H}_{25}\text{F}_3\text{N}_2\text{O}_2\text{S}$   $[\text{M}+\text{H}]^+$  511.1662, found 511.1663.

**(2'S,3S,4'R)-2-methyl-2'-(p-tolyl)-1'-tosyl-4'-vinylspiro[indole-3,3'-pyrrolidine] (3k)**

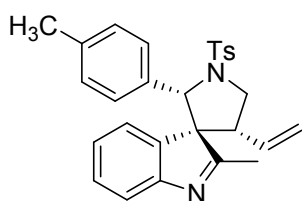

White solid, yield 77%.  $R_f = 0.3$  (petroleum ether/ethyl acetate = 2:1), dr = 7:1, mp = 159.0-161.5°C.  $[\alpha]_D^{20} = +28.7$  (c = 0.1, THF), 92% ee, determined by HPLC analysis (chiral IC column, 20% IPA in hexane, rate: 1.0 mL/min, 210 nm). Retention time: t (minor) = 21.5 min, t (major) = 30.1 min.  **$^1\text{H NMR}$**  (400 MHz,  $\text{CDCl}_3$ , ppm)  $\delta$  7.81 (d,  $J = 8.1$  Hz, 2H), 7.42 (d,  $J = 8.0$  Hz, 2H), 7.33 (d,  $J = 7.4$  Hz, 2H), 7.26 (s, 1H), 7.17-7.03 (m, 2H), 6.90-6.78 (m, 4H), 5.07 (s, 1H), 4.93-4.71 (m, 2H), 4.18 (dd,  $J = 12.1, 8.0$  Hz, 1H), 3.99 (t,  $J = 11.8$  Hz, 1H), 2.83 - 2.72 (m, 1H), 2.51 (s, 3H), 2.26 (s, 3H), 2.12 (s, 3H).  **$^{13}\text{C NMR}$**  (100 MHz,  $\text{CDCl}_3$ , ppm)  $\delta$  178.4, 154.6, 144.3, 137.0, 135.5, 133.9, 132.9, 130.9, 129.9, 128.3, 128.2, 128.1,



126.0, 125.0, 124.7, 120.0, 118.9, 73.3, 67.9, 53.0, 48.9, 21.7, 21.0, 15.8. **HRMS (ESI)**: calcd for C<sub>28</sub>H<sub>28</sub>N<sub>2</sub>O<sub>2</sub>S [M+H]<sup>+</sup> 457.1944, found 457.1945.

**(2'S,3S,4'R)-2'-(4-(tert-butyl)phenyl)-2-methyl-1'-tosyl-4'-vinylspiro[indole-3,3'-pyrrolidine] (3l)**

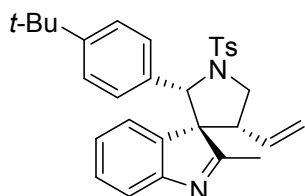

White solid, yield 71%.  $R_f = 0.3$  (petroleum ether/ethyl acetate = 2:1), dr = 9:1, mp = 131.1-134.7°C.  $[\alpha]_D^{20} = +24.5$  (c = 0.1, THF), 94% *ee*, determined by HPLC analysis (chiral IC column, 20% IPA in hexane, rate: 1.0 mL/min, 210 nm). Retention time: t (minor) = 18.5 min, t (major) = 32.3 min. **<sup>1</sup>H NMR** (400 MHz, CDCl<sub>3</sub>, ppm) δ 7.77 (d, *J* = 8.1 Hz, 2H), 7.37 (d, *J* = 8.0 Hz, 2H), 7.30 (s, 1H), 7.25 (d, *J* = 7.6 Hz, 1H), 7.14-7.00 (m, 2H), 6.94-6.84 (m, 4H), 5.10 (s, 1H), 4.92 - 4.71 (m, 3H), 4.23 (dd, *J* = 12.0, 8.0 Hz, 1H), 3.98 (t, *J* = 11.8 Hz, 1H), 2.87-2.80 (m, 1H), 2.49 (s, 3H), 2.27 (s, 3H), 1.12 (s, 9H). **<sup>13</sup>C NMR** (100 MHz, CDCl<sub>3</sub>, ppm) δ 178.5, 154.6, 150.1, 144.1, 135.5, 134.3, 132.5, 131.0, 129.8, 128.2, 128.1, 125.8, 125.0, 124.6, 124.2, 112.0, 118.8, 73.4, 67.9, 52.9, 48.9, 34.2, 31.1, 21.6, 15.9. **HRMS (ESI)**: calcd for C<sub>31</sub>H<sub>34</sub>N<sub>2</sub>O<sub>2</sub>S [M+H]<sup>+</sup> 499.2414, found 499.2412.

**(2'S,3S,4'R)-2'-(4-methoxyphenyl)-2-methyl-1'-tosyl-4'-vinylspiro[indole-3,3'-pyrrolidine] (3m)**

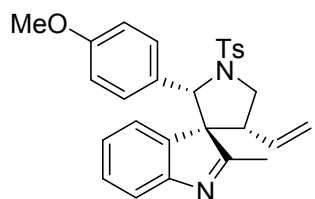

White solid, yield 83%.  $R_f = 0.3$  (petroleum ether/ethyl acetate = 2:1), dr = 5:1, mp = 106.8-107.2°C.  $[\alpha]_D^{20} = +27.0$  (c = 0.1, THF), 92% *ee*, determined by HPLC analysis (chiral IC column, 25% IPA in hexane, rate: 1.0 mL/min, 210 nm). Retention time: t (minor) = 23.6 min, t (major) = 32.7 min. **<sup>1</sup>H NMR** (400 MHz, CDCl<sub>3</sub>, ppm) δ 7.77 (d, *J* = 8.2 Hz, 2H), 7.39 (d, *J* = 8.1 Hz, 2H), 7.33 (d, *J* = 7.4 Hz, 1H), 7.25 - 7.02 (m, 3H), 6.90 (d, *J* = 8.3 Hz, 2H), 6.49 (d, *J* = 8.8 Hz, 2H), 5.01 (s, 1H), 4.89 - 4.65 (m, 3H), 4.17 (dd, *J* = 12.1, 8.1 Hz, 1H), 3.97 (t, *J* = 11.8 Hz, 1H), 3.60 (s, 3H), 2.83 - 2.70 (m, 1H), 2.48 (s, 3H), 2.23 (s, 3H). **<sup>13</sup>C NMR** (100 MHz, CDCl<sub>3</sub>, ppm) δ 178.4, 158.7, 154.6, 144.3, 135.5, 133.8, 130.9, 129.9, 128.4, 128.0,

127.9, 127.4, 125.0, 124.8, 120.1, 118.9, 112.8, 73.3, 67.8, 55.0, 53.0, 48.7, 21.7, 15.9.

**HRMS (ESI):** calcd for C<sub>28</sub>H<sub>28</sub>N<sub>2</sub>O<sub>3</sub>S [M+H]<sup>+</sup> 473.1893, found 473.1891.

**(2'S,3S,4'R)-2'-(4-fluorophenyl)-2-methyl-1'-tosyl-4'-vinylspiro[indole-3,3'-pyrrolidine] (3n)**

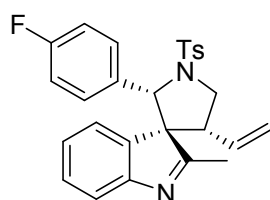

White solid, yield 71%. R<sub>f</sub> = 0.3 (petroleum ether/ethyl acetate = 2:1), dr = 7:1, mp = 149.2-150.6°C. [α]<sub>D</sub><sup>20</sup> = +29.7 (c = 0.1, THF), 90% *ee*, determined by HPLC analysis (chiral IC column, 20% IPA in hexane, rate: 1.0 mL/min, 210 nm).

Retention time: t (minor) = 16.0 min, t (major) = 19.8 min. **<sup>1</sup>H NMR** (400 MHz, CDCl<sub>3</sub>, ppm) δ 7.79 (d, *J* = 8.2 Hz, 2H), 7.41 (d, *J* = 8.0 Hz, 2H), 7.27-7.25 (m, 1H), 7.20 - 6.90 (m, 4H), 6.65 (t, *J* = 8.8 Hz, 2H), 5.06 (s, 1H), 4.89 - 4.71 (m, 3H), 4.18 (dd, *J* = 12.2, 8.0 Hz, 1H), 3.97 (t, *J* = 11.9 Hz, 1H), 2.79-2.73 (m, 1H), 2.50 (s, 3H), 2.24 (s, 3H). **<sup>13</sup>C NMR** (100 MHz, CDCl<sub>3</sub>, ppm) δ 178.2, 160.84 (d, *J* = 246.0 Hz), 154.6, 144.6, 135.3, 133.8, 131.92 (d, *J* = 3.1 Hz), 130.7, 130.0, 128.6, 128.1, 127.70 (d, *J* = 8.2 Hz), 124.9 (d, *J* = 4.4 Hz), 120.3, 120.0, 114.6, 114.3, 73.3, 67.4, 53.1, 48.9, 21.7, 15.8. **HRMS (ESI):** calcd for C<sub>27</sub>H<sub>25</sub>FN<sub>2</sub>O<sub>2</sub>S [M+H]<sup>+</sup> 461.1694, found 461.1694.

**(2'S,3S,4'R)-2'-(4-chlorophenyl)-2-methyl-1'-tosyl-4'-vinylspiro[indole-3,3'-pyrrolidine] (3o)**

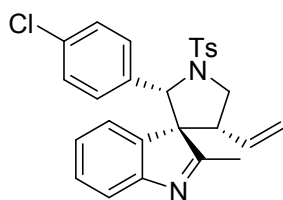

White solid, yield 60%. R<sub>f</sub> = 0.3 (petroleum ether/ethylacetate = 2:1), dr = 6:1, mp = 173.8-176.3°C. [α]<sub>D</sub><sup>20</sup> = +48.4 (c = 0.1, THF), 90% *ee*, determined by HPLC analysis (chiral IC column, 20% IPA in hexane, rate: 1.0 mL/min, 210 nm). Retention time: t (minor) = 16.7 min, t (major) = 24.2 min. **<sup>1</sup>H NMR** (400 MHz, CDCl<sub>3</sub>, ppm) δ 7.80 (d, *J* = 8.1 Hz, 2H), 7.42 (d, *J* = 8.0 Hz, 2H), 7.27 - 7.02 (m, 4H), 7.01 - 6.87 (m, 4H), 5.06 (s, 1H), 4.86 - 4.73 (m, 3H), 4.18 (dd, *J* = 12.1, 8.0 Hz, 1H), 3.98 (t, *J* = 11.9 Hz, 1H), 2.85 - 2.68 (m, 1H), 2.50 (s, 3H), 2.25 (s, 3H). **<sup>13</sup>C NMR** (100 MHz, CDCl<sub>3</sub>, ppm) δ 178.1, 154.5, 144.6, 135.1, 134.8, 133.6,

133.1, 130.6, 130.0, 128.6, 128.0, 127.7, 127.4, 124.9, 124.8, 120.3, 119.1, 73.1, 67.3, 53.1, 48.9, 21.7, 15.8. **HRMS (ESI)**: calcd for C<sub>27</sub>H<sub>25</sub>ClN<sub>2</sub>O<sub>2</sub>S [M+H]<sup>+</sup> 477.1398, found 477.1397.

**(2'S,3S,4'R)-2'-(4-bromophenyl)-2-methyl-1'-tosyl-4'-vinylspiro[indole-3,3'-pyrrolidine] (3p)**

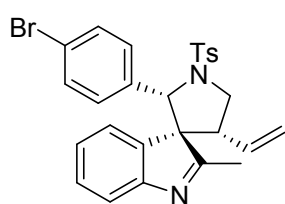

White solid, yield 72%. R<sub>f</sub> = 0.3 (petroleum ether/ethyl acetate = 2:1), dr = 10:1, mp = 167.5-171.2 °C. [α]<sub>D</sub><sup>20</sup> = +62.6 (c = 0.1, THF), 90% *ee*, determined by HPLC analysis (chiral IC column, 20% IPA in hexane, rate: 1.0 mL/min, 210 nm). Retention time: t (minor) = 17.4 min, t (major) = 26.1 min. **<sup>1</sup>H NMR** (400 MHz, CDCl<sub>3</sub>, ppm) δ 7.78 (d, *J* = 7.9 Hz, 2H), 7.40 (d, *J* = 7.8 Hz, 2H), 7.25-7.24 (m, 2H), 7.19-6.99 (m, 4H), 6.87-7.65 (m, 2H), 5.03 (s, 1H), 4.79 (m, 3H), 4.16 (dd, *J* = 11.9, 8.1 Hz, 1H), 3.96 (t, *J* = 11.8 Hz, 1H), 2.86-2.69 (m, 1H), 2.49 (s, 3H), 2.24 (s, 3H). **<sup>13</sup>C NMR** (100 MHz, CDCl<sub>3</sub>, ppm) δ 178.0, 154.5, 144.6, 135.3, 135.1, 133.6, 130.60, 130.55, 130.0, 128.7, 128.0, 127.8, 125.0, 124.8, 121.3, 120.3, 119.1, 73.0, 67.4, 53.0, 49.0, 21.7, 15.8. **HRMS (ESI)**: calcd for C<sub>27</sub>H<sub>25</sub>BrN<sub>2</sub>O<sub>2</sub>S [M+H]<sup>+</sup> 521.0893, found 521.0896.

**(2'S,3S,4'R)-2-methyl-2'-(naphthalen-2-yl)-1'-tosyl-4'-vinylspiro[indole-3,3'-pyrrolidine] (3q)**

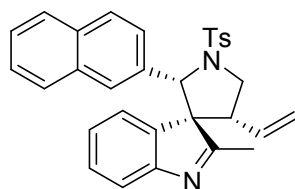

White solid, yield 73%. R<sub>f</sub> = 0.3 (petroleum ether/ethyl acetate = 2:1), dr = 10:1, mp = 157.2-158.6 °C. [α]<sub>D</sub><sup>20</sup> = -76.9 (c = 0.1, THF), 94% *ee*, determined by HPLC analysis (chiral IC column, 20% IPA in hexane, rate: 1.0 mL/min, 210 nm). Retention time: t (minor) = 25.0 min, t (major) = 29.3 min. **<sup>1</sup>H NMR** (400 MHz, CDCl<sub>3</sub>, ppm) δ 7.82 (d, *J* = 7.8 Hz, 2H), 7.76 (d, *J* = 7.1 Hz, 1H), 7.62 - 7.51 (m, 2H), 7.42 - 7.32 (m, 5H), 7.13 - 6.64 (m, 5H), 6.09 (s, 1H), 4.93 - 4.71 (m, 3H), 4.41 (dd, *J* = 11.9, 7.3 Hz, 1H), 4.02 (t, *J* = 11.7 Hz, 1H), 3.10-2.90 (m, 1H), 2.49 (s, 3H), 2.39 (s, 3H). **<sup>13</sup>C NMR** (100 MHz, CDCl<sub>3</sub>, ppm) δ 180.0, 154.5,

144.3, 135.3, 133.5, 133.2, 131.1, 130.3, 129.9, 128.6, 128.0, 127.9, 127.8, 125.6, 125.4, 125.3, 125.25, 125.22, 124.4, 124.1, 121.6, 119.8, 118.8, 72.5, 63.5, 53.1, 50.7, 21.6, 16.1. **HRMS (ESI)**: calcd for C<sub>31</sub>H<sub>28</sub>N<sub>2</sub>O<sub>2</sub>S [M+H]<sup>+</sup> 493.1944, found 493.1951.

**(2'S,3S,4'R)-2,5-dimethyl-2'-phenyl-1'-tosyl-4'-vinylspiro[indole-3,3'-pyrrolidine (3r)**

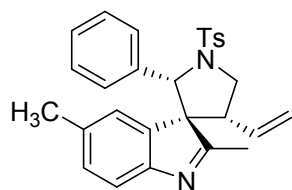

White solid, yield 72%. R<sub>f</sub> = 0.3 (petroleum ether/ethyl acetate = 2:1), dr = 9:1, mp =181.6-188.5°C. [α]<sub>D</sub><sup>20</sup> = +44.0 (c = 0.1, THF), 92% *ee*, determined by HPLC analysis (chiral IC column, 20% IPA in hexane, rate: 1.0 mL/min, 210nm).

Retention time: t (minor) = 23.9 min, t (major) = 30.1 min. **<sup>1</sup>H NMR** (400 MHz, CDCl<sub>3</sub>, ppm) δ 7.84 (d, *J* = 7.5 Hz, 2H), 7.44 (d, *J* = 7.4 Hz, 2H), 7.15 - 6.88 (m, 8H), 5.09 (s, 1H), 4.88 - 4.73 (m, 3H), 4.20 - 4.13 (m, 1H), 4.00 (t, *J* = 11.8 Hz, 1H), 2.77-2.67 (m, 1H), 2.52 (s, 3H), 2.29 (s, 3H), 2.24 (s, 3H). **<sup>13</sup>C NMR** (100 MHz, CDCl<sub>3</sub>, ppm) δ 177.2, 152.4, 144.4, 136.2, 135.5, 134.4, 133.7, 130.9, 129.9, 128.8, 128.1, 127.4, 126.0, 125.8, 119.5, 118.9, 73.1, 67.9, 53.2, 49.0, 21.7, 21.4, 15.7. **HRMS (ESI)**: calcd for C<sub>28</sub>H<sub>28</sub>N<sub>2</sub>O<sub>2</sub>S [M+H]<sup>+</sup> 457.1944, found 457.1939.

**(2'S,3S,4'R)-5-methoxy-2-methyl-2'-phenyl-1'-tosyl-4'-vinylspiro[indole-3,3'-pyrrolidine] (3s)**

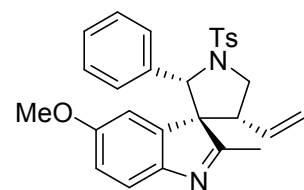

White solid, yield 65%. R<sub>f</sub> = 0.3 (petroleum ether/ethyl acetate = 2:1), dr = 13:1, mp =154.6-155.6°C. [α]<sub>D</sub><sup>20</sup> = +89.3 (c = 0.1, THF), 96% *ee*, determined by HPLC analysis (chiral IC column, 20% IPA in hexane, rate: 1.0 mL/min,

210 nm). Retention time: t (minor) = 29.9 min, t (major) = 33.6 min. **<sup>1</sup>H NMR** (400 MHz, CDCl<sub>3</sub>, ppm) δ 7.83 (d, *J* = 8.2 Hz, 2H), 7.43 (d, *J* = 8.1 Hz, 2H), 7.17-7.01 (m, 6H), 6.84 - 6.59 (m, 2H), 5.14 (s, 1H), 4.84 - 4.78 (m, 3H), 4.18 (dd, *J* = 12.2, 7.9 Hz, 1H), 3.96 (t, *J* = 11.9 Hz, 1H), 3.74 (s, 3H), 2.81 - 2.69 (m, 1H), 2.52 (s, 3H), 2.23 (s, 3H). **<sup>13</sup>C NMR** (100 MHz, CDCl<sub>3</sub>, ppm) δ 176.2, 157.3, 148.5, 144.4, 137.0, 136.3, 133.9, 130.8, 129.9, 128.1, 127.5, 127.4, 125.9, 120.1, 119.0, 112.7, 112.2, 73.4, 67.7,

55.8, 52.9, 49.1, 21.7, 15.6. **HRMS (ESI)**: calcd for C<sub>28</sub>H<sub>28</sub>N<sub>2</sub>O<sub>3</sub>S [M+H]<sup>+</sup> 473.1893, found 473.1900.

**(2'S,3S,4'R)-5-fluoro-2-methyl-2'-phenyl-1'-tosyl-4'-vinylspiro[indole-3,3'-pyrrolidine] (3t)**

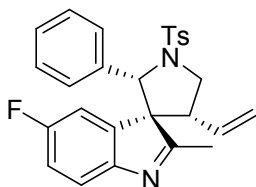

White solid, yield 78%. R<sub>f</sub> = 0.3 (petroleum ether/ethyl acetate = 2:1), dr = 13:1, mp = 198.5-199.9 °C. [α]<sub>D</sub><sup>20</sup> = +33.6 (c = 0.1, THF), 90% *ee*, determined by HPLC analysis (chiral IC column, 20% IPA in hexane, rate: 1.0 mL/min, 210 nm). Retention time: t (minor) = 17.9 min, t (major) = 21.5 min. **<sup>1</sup>H NMR** (400 MHz, CDCl<sub>3</sub>, ppm) δ 7.82 (d, *J* = 8.1 Hz, 2H), 7.42 (d, *J* = 8.1 Hz, 2H), 7.20 - 7.17 (m, 1H), 7.01 - 6.96 (m, 6H), 6.85 - 6.80 (m, 1H), 5.16 (s, 1H), 4.95 - 4.75 (m, 1H), 4.22 (dd, *J* = 12.2, 7.9 Hz, 1H), 3.91 (t, *J* = 11.9 Hz, 1H), 2.88 - 2.78 (m, 1H), 2.51 (s, 3H), 2.27 (s, 3H). **<sup>13</sup>C NMR** (100 MHz, CDCl<sub>3</sub>, ppm) δ 178.4, 160.4 (d, *J* = 244.2 Hz), 144.5, 137.40 (d, *J* = 8.9 Hz), 135.9, 134.0, 130.4, 130.0, 128.0, 127.6, 125.9, 120.6 (d, *J* = 9.0 Hz), 119.3, 115.0, 114.9, 112.7 (d, *J* = 25.4 Hz), 73.8, 67.7, 52.9, 48.9, 29.7, 21.7, 15.8. **HRMS (ESI)**: calcd for C<sub>27</sub>H<sub>25</sub>FN<sub>2</sub>O<sub>2</sub>S [M+H]<sup>+</sup> 461.1694, found 461.1700.

**(2'S,3S,4'R)-5-chloro-2-methyl-2'-phenyl-1'-tosyl-4'-vinylspiro[indole-3,3'-pyrrolidine] (3u)**

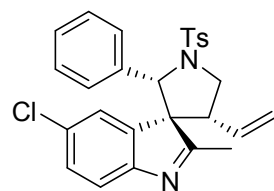

White solid, yield 73%. R<sub>f</sub> = 0.3 (petroleum ether/ethyl acetate = 2:1), dr = 10:1, mp = 158.3-166.1 °C. [α]<sub>D</sub><sup>20</sup> = -86.9 (c = 0.1, THF), 93% *ee*, determined by HPLC analysis (chiral IC column, 20% IPA in hexane, rate: 1.0 mL/min, 210 nm). Retention time: t (minor) = 18.5 min, t (major) = 21.6 min. **<sup>1</sup>H NMR** (400 MHz, CDCl<sub>3</sub>, ppm) δ 7.80 (d, *J* = 8.1 Hz, 2H), 7.40 (d, *J* = 8.0 Hz, 2H), 7.27 - 7.05 (m, 3H), 7.04 - 6.90 (d, *J* = 5.1 Hz, 5H), 5.12 (s, 1H), 4.90 - 4.75 (m, 3H), 4.19 (dd, *J* = 12.2, 7.9 Hz, 1H), 3.91 (t, *J* = 11.9 Hz, 1H), 2.85 - 2.73 (m, 1H), 2.49 (s, 3H), 2.26 (s, 3H). **<sup>13</sup>C NMR** (100 MHz, CDCl<sub>3</sub>, ppm) δ 179.1, 153.1, 144.5, 135.8, 133.9, 130.6, 130.4,

130.0, 128.5, 128.1, 127.6, 125.9, 125.3, 120.8, 119.4, 73.7, 67.8, 53.0, 49.0, 21.7, 15.8. **HRMS (ESI)**: calcd for C<sub>27</sub>H<sub>25</sub>ClN<sub>2</sub>O<sub>2</sub>S [M+H]<sup>+</sup> 477.1398, found 477.1396.

**(2'S,3S,4'R)-5-bromo-2-methyl-2'-phenyl-1'-tosyl-4'-vinylspiro[indole-3,3'-pyrrolidine] (3v)**

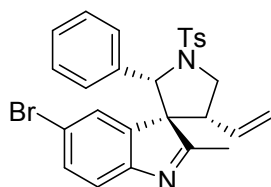

White solid, yield 70%. R<sub>f</sub> = 0.3 (petroleum ether/ethyl acetate = 2:1), dr = 11:1, mp = 154.7-155.6 °C. [α]<sub>D</sub><sup>20</sup> = -28.1 (c = 0.1, THF), 96% *ee*, determined by HPLC analysis (chiral IC column, 20% IPA in hexane, rate: 1.0 mL/min, 210 nm).

Retention time: t (minor) = 19.7 min, t (major) = 22.4 min. **<sup>1</sup>H NMR** (400 MHz, CDCl<sub>3</sub>, ppm) δ 7.82 (d, *J* = 8.2 Hz, 2H), 7.41 (m, 3H), 7.27 - 7.08 (m, 1H), 7.05 - 6.95 (m, 5H), 5.14 (s, 1H), 4.95 - 4.75 (m, 3H), 4.21 (dd, *J* = 12.2, 7.9 Hz, 1H), 3.93 (t, *J* = 11.9 Hz, 1H), 2.85-2.79 (m, 1H), 2.52 (s, 3H), 2.28 (s, 3H). **<sup>13</sup>C NMR** (100 MHz, CDCl<sub>3</sub>, ppm) δ 179.1, 153.6, 144.5, 137.7, 135.8, 133.9, 131.4, 130.4, 130.0, 128.1, 128.1, 127.7, 127.6, 125.8, 121.3, 119.4, 118.5, 73.8, 67.8, 53.1, 49.0, 21.7, 15.8. **HRMS (ESI)**: calcd for C<sub>27</sub>H<sub>25</sub>BrN<sub>2</sub>O<sub>2</sub>S [M+H]<sup>+</sup> 521.0892, found 521.0896.

**(2'S,3S,4'R)-6-fluoro-2-methyl-2'-phenyl-1'-tosyl-4'-vinylspiro[indole-3,3'-pyrrolidine] (3w)**

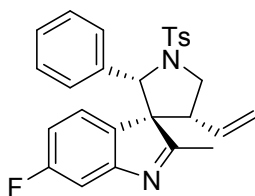

White solid, yield 78%. R<sub>f</sub> = 0.3 (petroleum ether/ethyl acetate = 2:1), dr = 12:1, mp = 128.9-133.0 °C. [α]<sub>D</sub><sup>20</sup> = +30.5 (c = 0.1, THF), 92% *ee*, determined by HPLC analysis (chiral IC column, 20% IPA in hexane, rate: 1.0 mL/min, 210 nm).

Retention time: t (minor) = 17.9 min, t (major) = 21.5 min. **<sup>1</sup>H NMR** (400 MHz, CDCl<sub>3</sub>, ppm) δ 7.82 (d, *J* = 8.1 Hz, 2H), 7.42 (d, *J* = 8.0 Hz, 2H), 7.21-7.18 (m, 1H), 7.07 - 6.65 (m, 7H), 5.12 (s, 1H), 4.91 - 4.68 (m, 2H), 4.20 (dd, *J* = 12.1, 7.9 Hz, 1H), 3.94 (t, *J* = 11.9 Hz, 1H), 2.81- 2.74 (m, 1H), 2.51 (s, 3H), 2.28 (s, 3H). **<sup>13</sup>C NMR** (100 MHz, CDCl<sub>3</sub>, ppm) δ 180.9, 162.90 (d, *J* = 245.3 Hz), 156.1 (d, *J* = 11.0 Hz), 144.5, 136.0, 133.9, 131.1 (d, *J* = 3.0 Hz), 130.5, 130.0, 128.0, 127.6, 125.9, 125.4 (d,

$J = 9.6$  Hz), 119.1, 111.5, 115.3, 107.88 (d,  $J = 23.9$  Hz), 73.0, 67.8, 53.0, 49.0, 21.7, 15.9. **HRMS (ESI)**: calcd for  $C_{27}H_{25}FN_2O_2S$   $[M+H]^+$  461.1693, found 461.1697.

**(2'S,3S,4'R)-2-ethyl-2'-phenyl-1'-tosyl-4'-vinylspiro[indole-3,3'-pyrrolidine] (3x)**

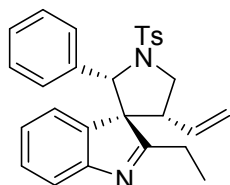

White solid, yield 76%.  $R_f = 0.3$  (petroleum ether/ethyl acetate = 2:1), dr = 6:1, mp = 111.4-118.1°C.  $[\alpha]_D^{20} = +26.7$  (c = 0.1, THF), 94% *ee*, determined by HPLC analysis (chiral IC column, 20% IPA in hexane, rate: 1.0 mL/min, 210 nm). Retention time: t (minor) = 20.2 min, t (major) = 23.8 min.  **$^1H$  NMR** (400 MHz,  $CDCl_3$ , ppm)  $\delta$  7.82 (d,  $J = 7.5$  Hz, 2H), 7.42 (d,  $J = 7.4$  Hz, 2H), 7.32 - 7.30 (m, 1H), 7.25 - 7.11 (m, 2H), 7.08 - 6.89 (m, 6H), 5.14 (s, 1H), 4.81 - 4.76 (m, 1H), 4.29 - 4.09 (m, 1H), 3.97 (t,  $J = 11.7$  Hz, 1H), 2.82 (s, 1H), 2.69 - 2.56 (m, 1H), 2.52 (s, 3H), 2.36 (dd,  $J = 16.6, 7.6$  Hz, 1H), 1.41 (t,  $J = 6.9$  Hz, 3H).  **$^{13}C$  NMR** (100 MHz,  $CDCl_3$ , ppm)  $\delta$  144.4, 136.1, 135.4, 134.0, 130.9, 129.9, 128.8, 128.6, 128.4, 128.1, 127.5, 125.9, 125.0, 120.1, 119.0, 73.4, 67.9, 53.1, 49.0, 22.2, 21.7, 10.8. **HRMS (ESI)**: calcd for  $C_{28}H_{28}N_2O_2S$   $[M+H]^+$  457.1943, found 457.1949.

**(2'S,3S,4'R)-2'-phenyl-2-(prop-1-yn-1-yl)-1'-tosyl-4'-vinylspiro[indole-3,3'-pyrrolidine] (3y)**

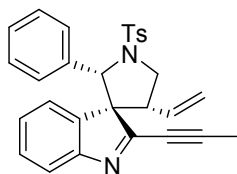

White solid, yield 70%.  $R_f = 0.3$  (petroleum ether/ethyl acetate = 2:1), dr = 11:1, mp = 113.4-115.8°C.  $[\alpha]_D^{20} = +46.4$  (c = 0.1, THF), 92% *ee*, determined by HPLC analysis (chiral IC column, 25% IPA in hexane, rate: 1.0 mL/min, 210 nm). Retention time: t (minor) = 24.9 min, t (major) = 26.4 min.  **$^1H$  NMR** (400 MHz,  $CDCl_3$ , ppm)  $\delta$  7.84 (d,  $J = 6.7$  Hz, 2H), 7.41 (d,  $J = 6.8$  Hz, 2H), 7.36 - 7.29 (m, 2H), 7.14 - 7.08 (m, 4H), 6.98 - 6.96 (m, 1H), 5.30 (s, 1H), 4.96 - 4.63 (m, 1H), 4.19 - 4.15 (m, 1H), 4.02 (t,  $J = 11.7$  Hz, 1H), 3.05 - 2.91 (s, 1H), 2.46 (s, 3H), 2.10 (s, 3H).  **$^{13}C$  NMR** (100 MHz,  $CDCl_3$ , ppm)  $\delta$  163.5, 154.9, 144.1, 136.1, 134.5, 133.6, 130.4, 129.9, 128.6, 128.3, 127.4, 126.1, 125.9, 124.9, 121.3, 119.1, 98.4, 74.3, 73.7, 68.3, 53.2, 48.7, 21.7, 4.9. **HRMS (ESI)**: calcd for  $C_{29}H_{26}N_2O_2S$   $[M+H]^+$  467.1788, found 467.1785.

**(2'S,3S,4'R)-2'-phenyl-1'-tosyl-4'-vinylspiro[indole-3,3'-pyrrolidine] (3z)**

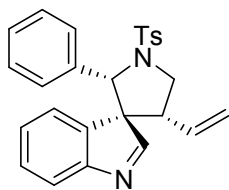

White solid, yield 54%.  $R_f = 0.3$  (petroleum ether/ethyl acetate = 2:1), dr = 2:1, mp = 116.5-117.8°C.  $[\alpha]_D^{20} = +16.5$  (c = 0.1, THF), 94% ee, determined by HPLC analysis (chiral IC column, 20% IPA in hexane, rate: 1.0 mL/min, 210 nm). Retention time: t (minor) = 29.1 min, t (major) = 37.2 min.  **$^1\text{H NMR}$**  (400 MHz,  $\text{CDCl}_3$ , ppm)  $\delta$  7.92 (s, 1H), 7.81 (d,  $J = 7.6$  Hz, 2H), 7.56 - 7.29 (m, 5H), 7.19 - 7.02 (m, 4H), 6.93 (s, 2H), 5.24 - 5.14 (m, 1H), 5.11 (s, 1H), 4.77 (dd,  $J = 32.0, 13.7$  Hz, 2H), 4.33 (dd,  $J = 11.6, 7.6$  Hz, 1H), 3.94 (t,  $J = 11.8$  Hz, 1H), 2.85 - 2.75 (m, 1H), 2.52 (s, 3H).  **$^{13}\text{C NMR}$**  (100 MHz,  $\text{CDCl}_3$ , ppm)  $\delta$  171.2, 155.8, 144.3, 136.5, 136.2, 134.5, 129.99, 129.93, 129.1, 128.1, 128.0, 127.9, 126.8, 125.3, 121.5, 121.3, 118.9, 71.5, 70.2, 53.9, 50.1, 21.7. **HRMS (ESI)**: calcd for  $\text{C}_{26}\text{H}_{24}\text{N}_2\text{O}_2\text{S}$   $[\text{M}+\text{H}]^+$  429.1631, found 429.1635.

**(2'S,3S,4'R)-2,4'-dimethyl-2'-phenyl-1'-tosyl-4'-vinylspiro[indole-3,3'-pyrrolidine] (6a)**

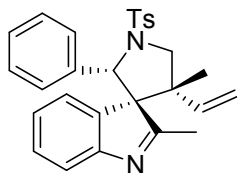

White solid, yield 51%.  $R_f = 0.3$  (petroleum ether/ethyl acetate = 2:1), dr = 5:1, mp = 158.2-163.7°C.  $[\alpha]_D^{20} = -30.4$  (c = 0.1, THF), 17% ee, determined by HPLC analysis (chiral IC column, 20% IPA in hexane, rate: 1.0 mL/min, 210 nm). Retention time: t (minor) = 30.6 min, t (major) = 35.9 min.  **$^1\text{H NMR}$**  (400 MHz,  $\text{CDCl}_3$ , ppm)  $\delta$  7.71 (d,  $J = 8.1$  Hz, 2H), 7.39 - 7.28 (m, 3H), 7.16 (t,  $J = 7.6$  Hz, 1H), 7.08 - 7.00 (m, 3H), 6.91 - 6.84 (m, 3H), 6.53 (d,  $J = 7.6$  Hz, 1H), 5.40 - 5.28 (m, 1H), 5.07 (s, 1H), 4.95 - 4.89 (m, 2H), 3.97 (dd,  $J = 10.92, 10.14$  Hz, 2H), 2.47 (s, 3H), 2.02 (s, 3H), 1.09 (s, 3H).  **$^{13}\text{C NMR}$**  (100 MHz,  $\text{CDCl}_3$ , ppm)  $\delta$  180.8, 154.7, 144.2, 140.0, 137.6, 135.7, 134.3, 129.8, 128.4, 128.0, 127.5, 127.5, 127.2, 127.1, 124.2, 119.8, 113.8, 75.2, 66.2, 58.7, 48.4, 23.5, 21.6, 19.8. **HRMS (ESI)**: calcd for  $\text{C}_{26}\text{H}_{24}\text{N}_2\text{O}_2\text{S}$   $[\text{M}+\text{H}]^+$  456.1871, found 456.1874.



### 3.2 The Compound 4 and 5 in Scheme 3

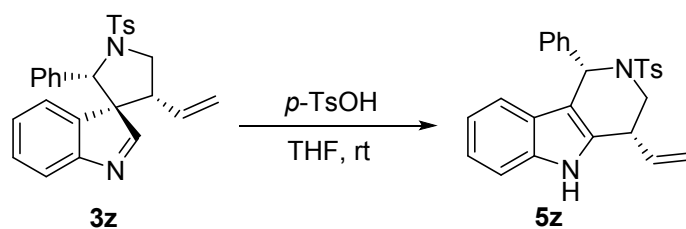

To a solution of **3z** (46.5 mg 0.11 mmol) in THF (2 mL) was added *p*-TsOH (6.3 mg 0.033 mmol) and then stirred at room temperature under argon atmosphere for 20 h. Upon completion of the reaction, the solvent was removed under reduced pressure, added saturated NaHCO<sub>3</sub> (2 mL), and the aqueous phase was extracted with ethyl acetate (3×3 mL). The organic phases was washed by water (5 mL) and saturated brine (5 mL), and dried over anhydrous Na<sub>2</sub>SO<sub>4</sub>, the residue was purified by column chromatography on silica gel to give compound **5z** (39 mg, 91% yield, 94% *ee*) as a white solid. Dr =12:1. R<sub>f</sub> = 0.3 (petroleum ether/ethyl acetate = 4:1), mp = 112-114 °C, [α]<sub>D</sub><sup>20</sup> = +54.9 (c = 0.1, THF), 94% *ee*, determined by HPLC analysis (chiral IC column, 20% IPA in hexane, rate: 1.0 mL/min, 210 nm). Retention time: t (minor) =6.0 min, t (major) = 7.2 min. **<sup>1</sup>H NMR** (400 MHz, CDCl<sub>3</sub>, ppm) δ 7.77 (s, 1H), 7.48 (d, *J* = 8.3 Hz, 2H), 7.41 (d, *J* = 7.9 Hz, 1H), 7.22 (s, 4H), 7.19 - 7.17 (m, 1H), 7.09-7.05 (m, 1H), 6.97 (d, *J* = 8.4 Hz, 1H), 6.22 (s, 1H), 5.71 -5.62 (m, 1H), 5.31 - 5.14 (m, 2H), 3.77 (dd, *J* = 14.5, 5.9 Hz, 1H), 3.44 -3.37 (m, 1H), 2.90 (dd, *J* = 14.5, 10.9 Hz, 1H), 2.18 (s, 3H). **<sup>13</sup>C NMR** (100 MHz, CDCl<sub>3</sub>, ppm) δ 143.3, 138.9, 138.1, 137.5, 136.2, 130.5, 129.4, 128.7, 128.6, 126.9, 126.5, 122.2, 120.0, 119.5, 117.9, 111.0, 55.7, 46.2, 44.8, 37.5, 21.4, 11.4. **HRMS (ESI)**: calcd for C<sub>26</sub>H<sub>24</sub>N<sub>2</sub>O<sub>2</sub>S [M+H]<sup>+</sup> 429.1631, found 429.1631.

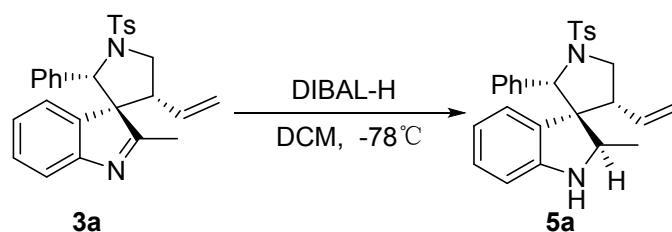

To a solution of **3a** (44.3 mg 0.1 mmol) in DCM (2 mL) was added DIBAL-H (0.2 mmol), and then stirred at -78 °C under argon atmosphere for 4 h. Upon completion of

the reaction, the reaction was quenched with water (5 mL). The mixture was extracted with Dichloromethane (3 × 5 mL), the combined organic layer was dried MgSO<sub>4</sub>. After removal of the solvents under reduced pressure, the residual was purified by column chromatography, affording the title compound **5a** (38.7 mg, 87% yield, 96% *ee*) as a white solid. *dr*=7:1. *R<sub>f</sub>* = 0.3 (petroleum ether/ethyl acetate = 5:1), *mp* = 98-100 °C,  $[\alpha]_{\text{D}}^{20} = -52.13$  (*c* = 0.1, THF), 96% *ee*, determined by HPLC analysis (chiral IE column, 20% IPA in hexane, rate: 1.0 mL/min, 210 nm). Retention time: *t* (minor) = 22.7 min, *t* (major) = 24.8 min. **<sup>1</sup>H NMR** (400 MHz, CDCl<sub>3</sub>, ppm) δ 7.68 (d, *J* = 8.0 Hz, 2H), 7.43 - 7.22 (m, 2H), 7.03 - 6.85 (m, 7H), 6.60 (t, *J* = 7.4 Hz, 1H), 6.32 (d, *J* = 7.8 Hz, 1H), 5.82 - 5.60 (m, 1H), 5.09 - 5.1 (m, 2H), 4.91 (s, 1H), 4.11 (dd, *J* = 11.6, 9.0 Hz, 1H), 3.90 (t, *J* = 11.5 Hz, 1H), 3.74 - 3.70 (m, 1H), 2.46 (s, 1H), 2.41 (dd, *J* = 19.5, 9.2 Hz, 1H), 1.31 (d, *J* = 6.6 Hz, 3H). **<sup>13</sup>C NMR** (100 MHz, CDCl<sub>3</sub>, ppm) δ 150.7, 143.5, 138.1, 135.2, 134.9, 129.6, 128.2, 128.11, 128.06, 127.8, 127.0, 126.8, 126.7, 119.4, 118.3, 110.0, 67.5, 62.9, 60.0, 52.8, 50.0, 21.6, 15.0. **HRMS (ESI)**: calcd for C<sub>27</sub>H<sub>28</sub>N<sub>2</sub>O<sub>2</sub>S [M+H]<sup>+</sup> 445.1944, found 445.1948.

#### 4. References

- [1] (a) Z. S. Liu, W. K. Li, T. R. Kang, L. He and Q. Z. Liu, Palladium-Catalyzed Asymmetric Cycloadditions of Vinylcyclopropanes and in Situ Formed Unsaturated Imines: Construction of Structurally and Optically Enriched Spiroindolenines, *Org. Lett.*, 2015, **17**, 150. (b) Y. Chen, X. Q. Guo, C. Zhou, L. M. Chen and T. R. Kang, Direct N-sec-Alkylation of Amides by Reaction of Halohydroxamates and Sulfonylindoles: An Approach to 3-Indolyl Methanamines, *Synlett*, 2019, **30**, 851.
- [2] E. Rossi, G. Abbiati, V. Canevari, G. Celentano, E. Magri, 2-Trifluoromethanesulfonyloxyindole-1-carboxylic Acid Ethyl Ester: A Practical Intermediate for the Synthesis of 2-Carbo-substituted Indoles, *Synthesis*, 2006, **2**, 299.
- [3] S. I. Ali, M. D. Nikalje and A. Sudalai, Pyridinium Hydrobromide Perbromide: A Versatile Catalyst for Aziridination of Olefins Using Chloramine-T, *Org. Lett.*, 1999, **1**, 705.

## 5. NMR spectra of the products

### (2'S,3S,4'R)-2-methyl-2'-phenyl-1'-tosyl-4'-vinylspiro[indole-3,3'-pyrrolidine] (3a)

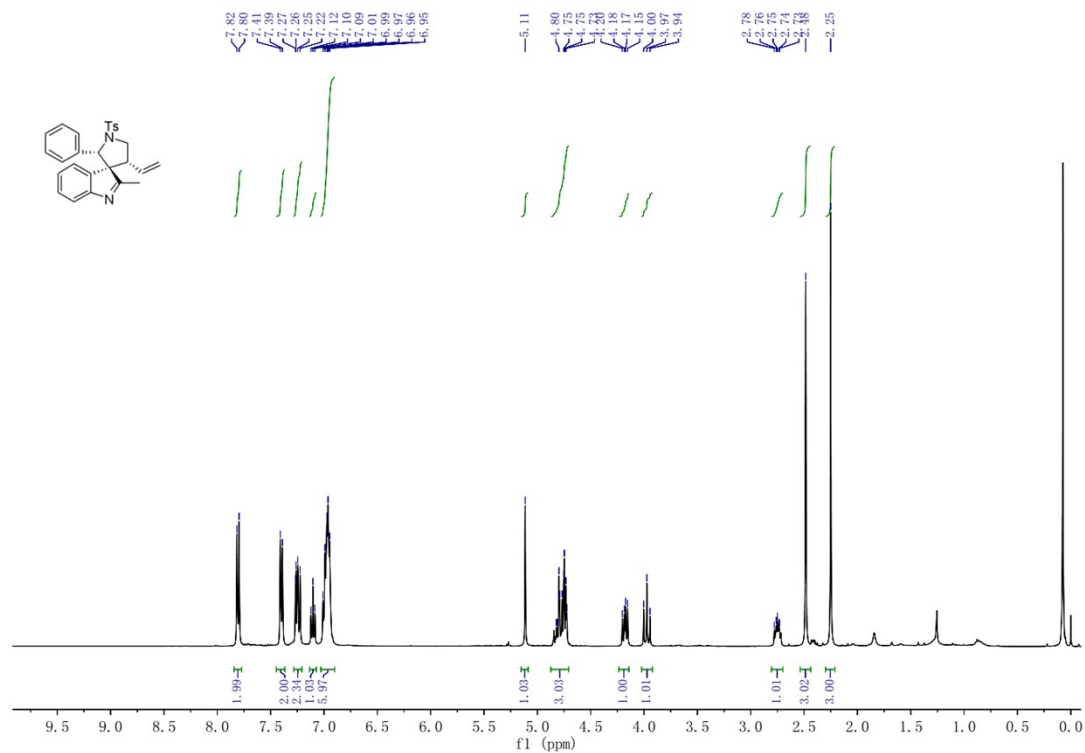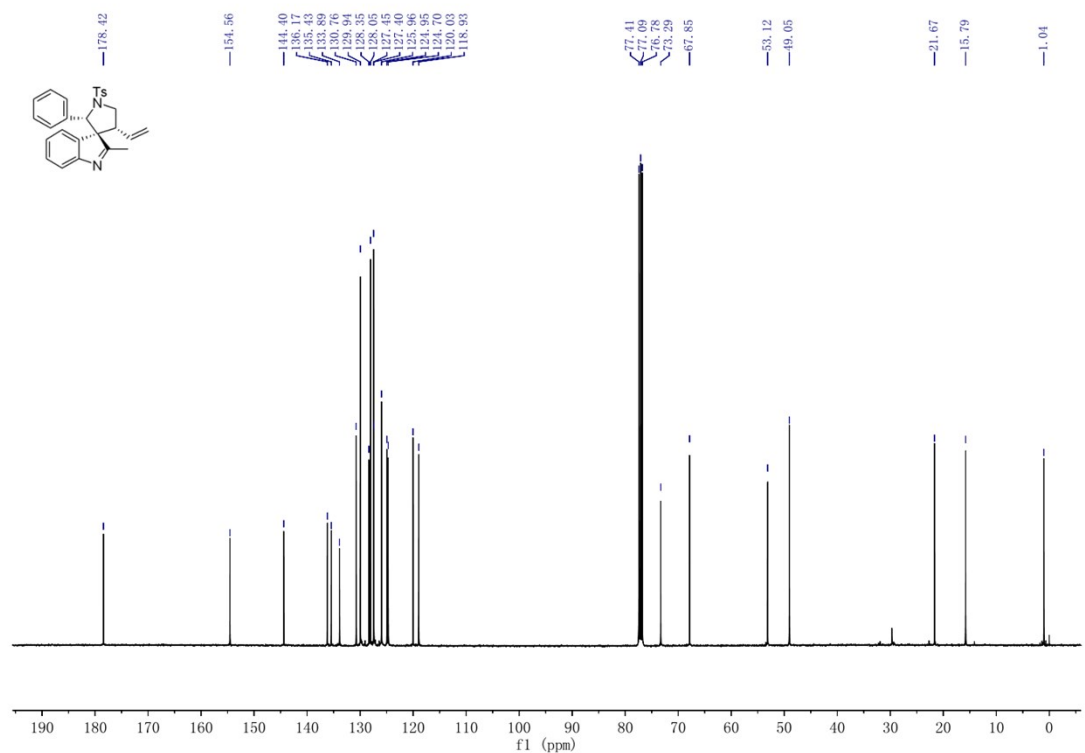

### (2'S,3S,4'R)-2-methyl-2'-(o-tolyl)-1'-tosyl-4'-vinylspiro[indole-3,3'-pyrrolidine]

(3b)

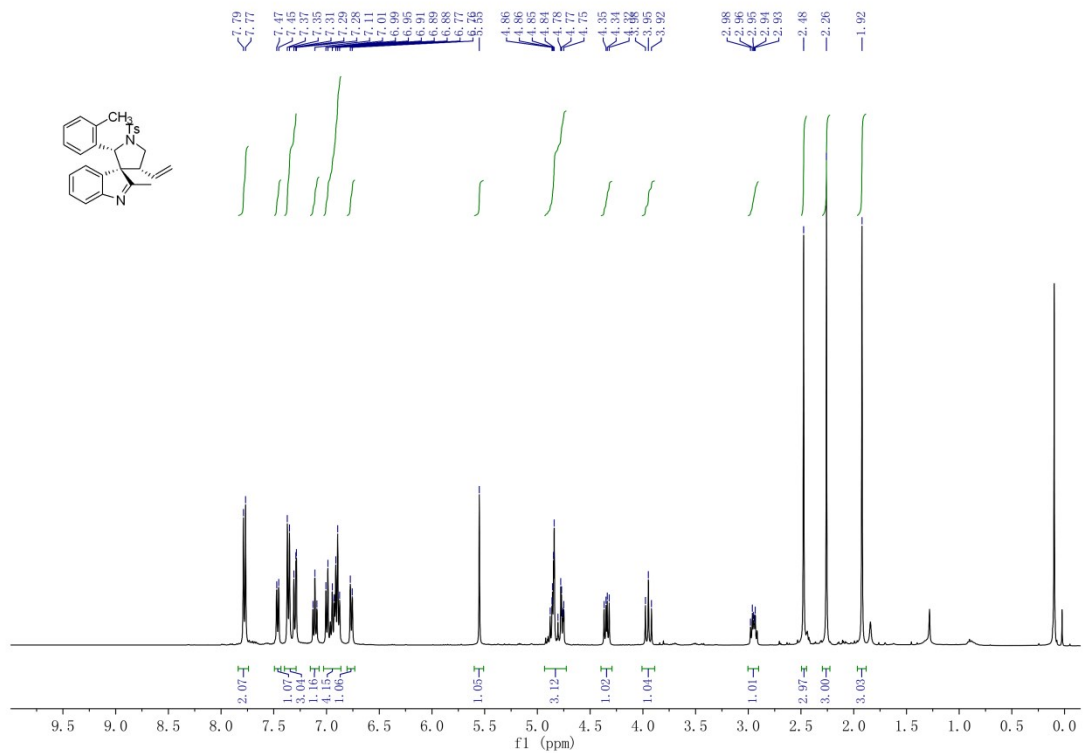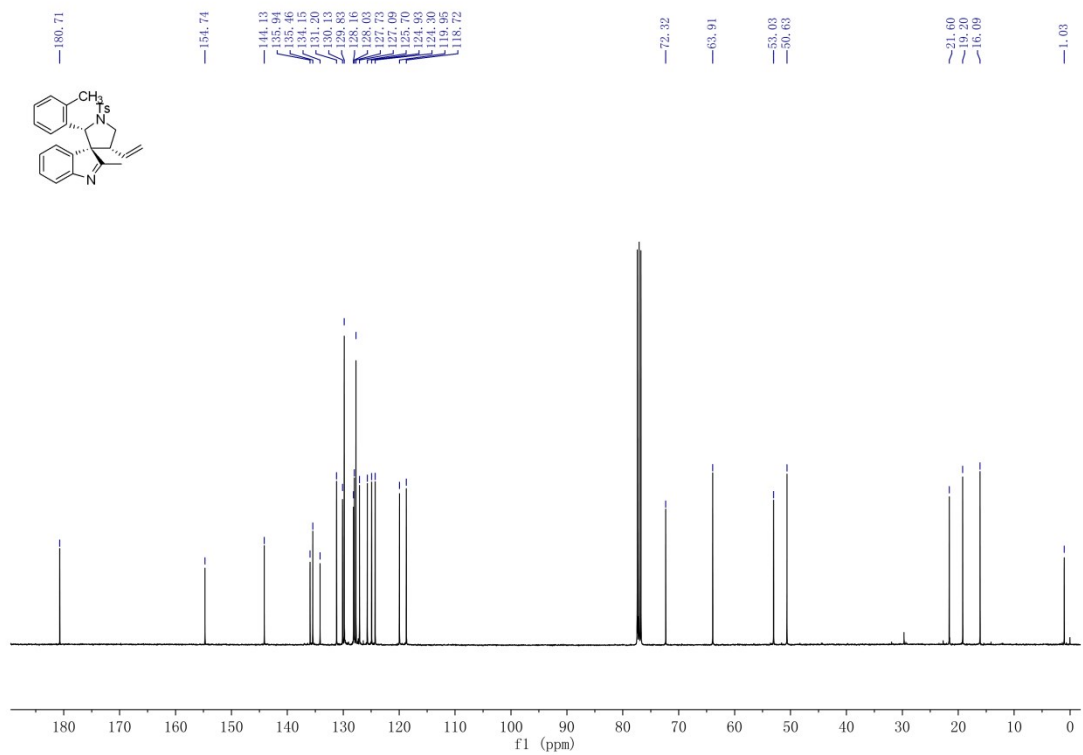

**(2'R,3S,4'R)-2'-(2-methoxyphenyl)-2-methyl-1'-tosyl-4'-vinylspiro[indole-3,3'-pyrrolidine] (3c)**

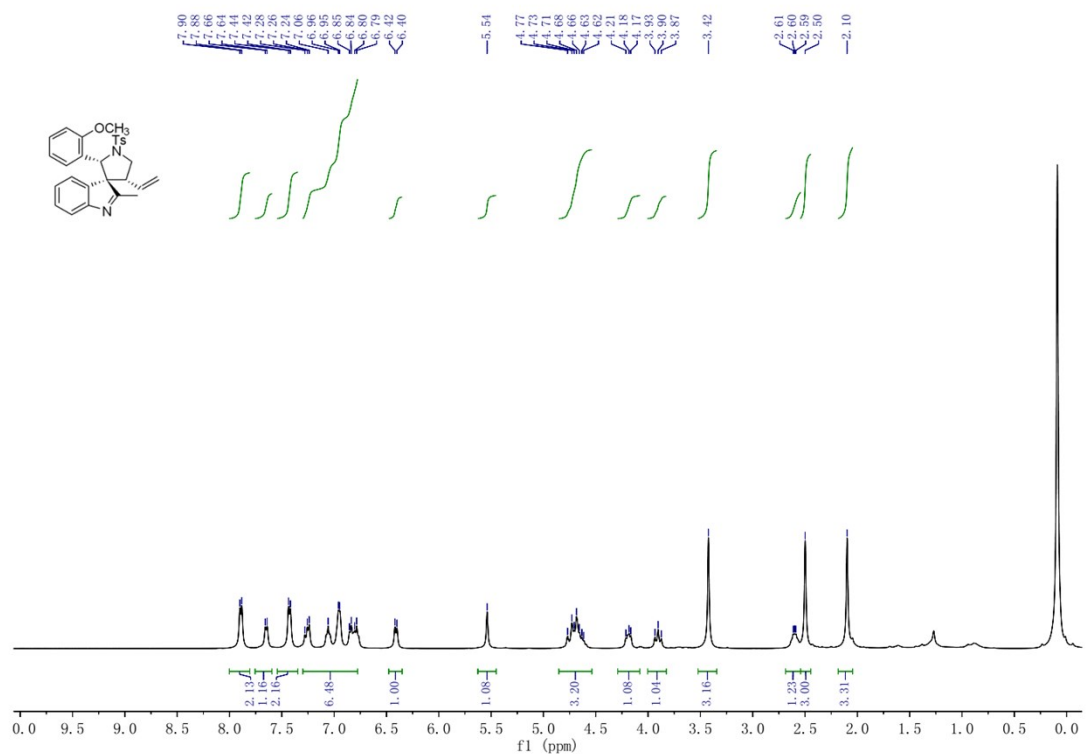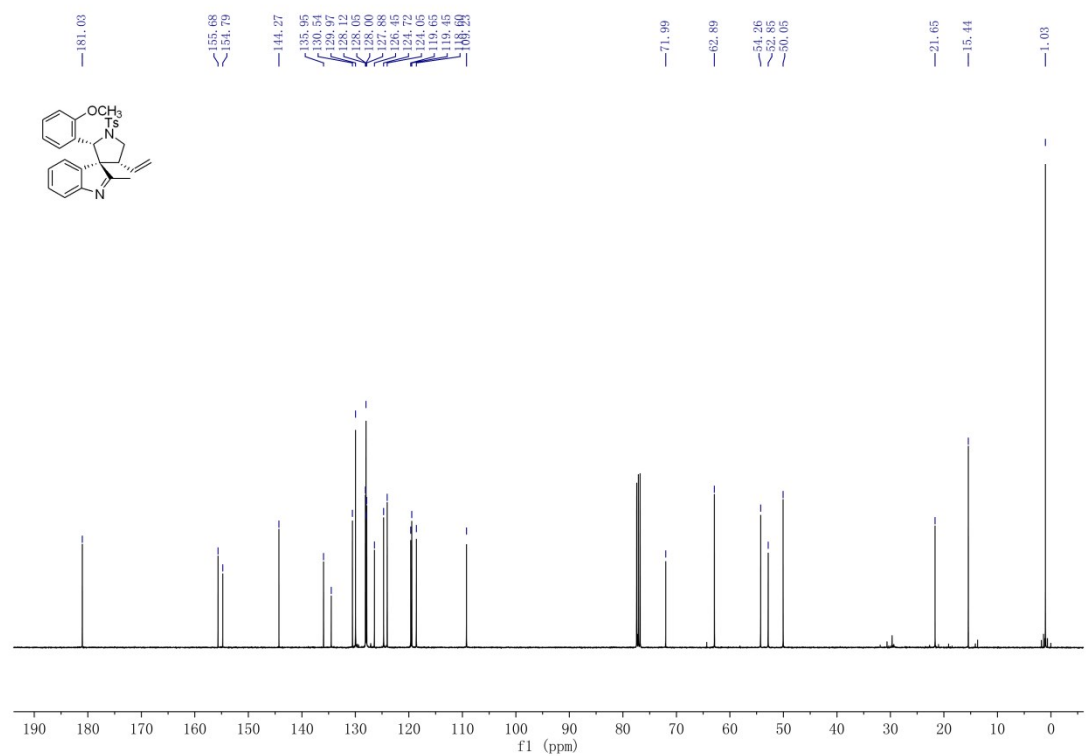

**(2'R,3S,4'R)-2'-(2-chlorophenyl)-2-methyl-1'-tosyl-4'-vinylspiro[indole-3,3'-pyrrolidine] (3d)**

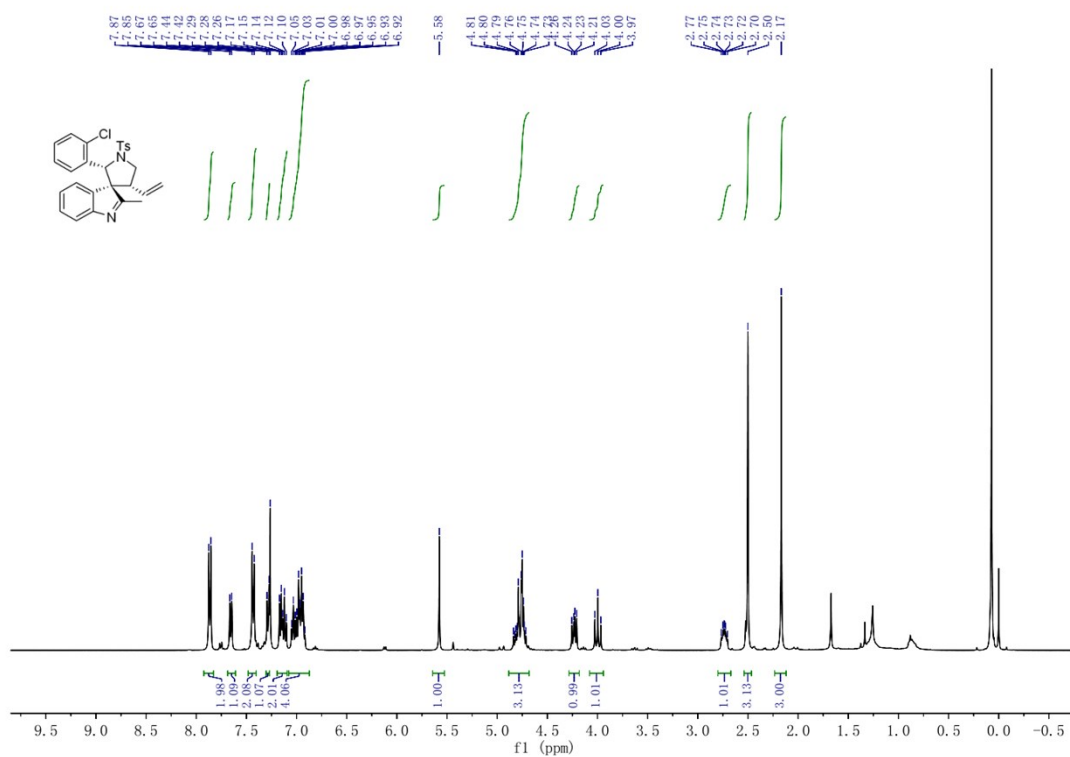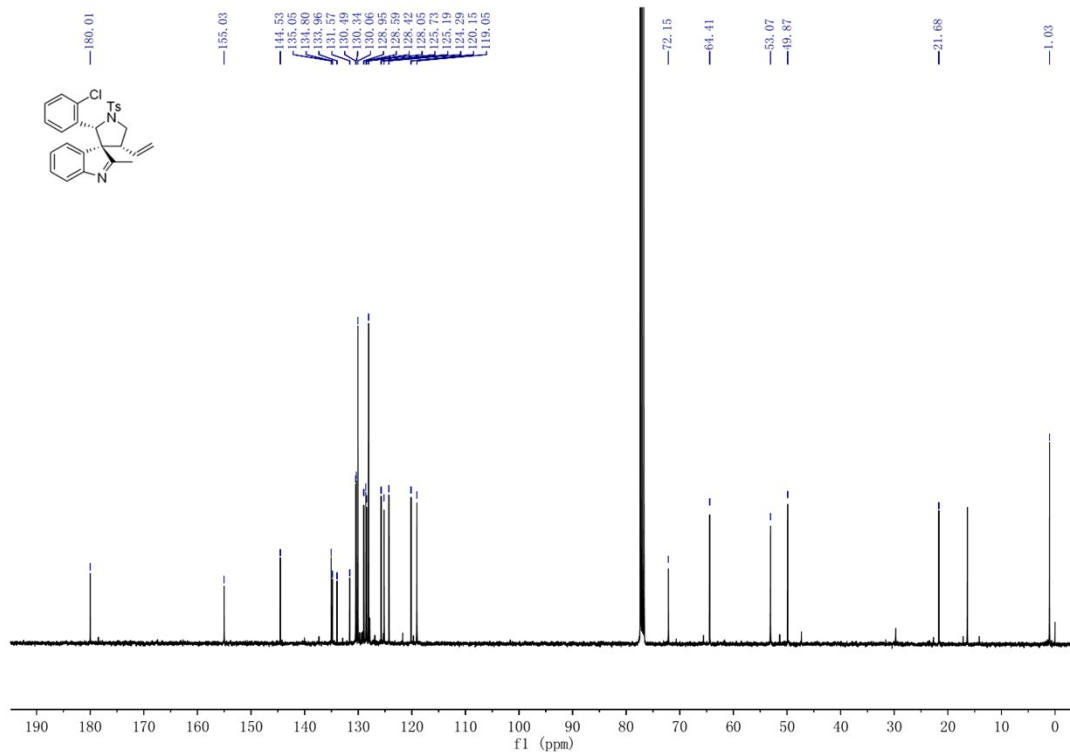

**(2'R,3S,4'R)-2'-(2-bromophenyl)-2-methyl-1'-tosyl-4'-vinylspiro[indole-3,3'-pyrrolidine] (3e)**

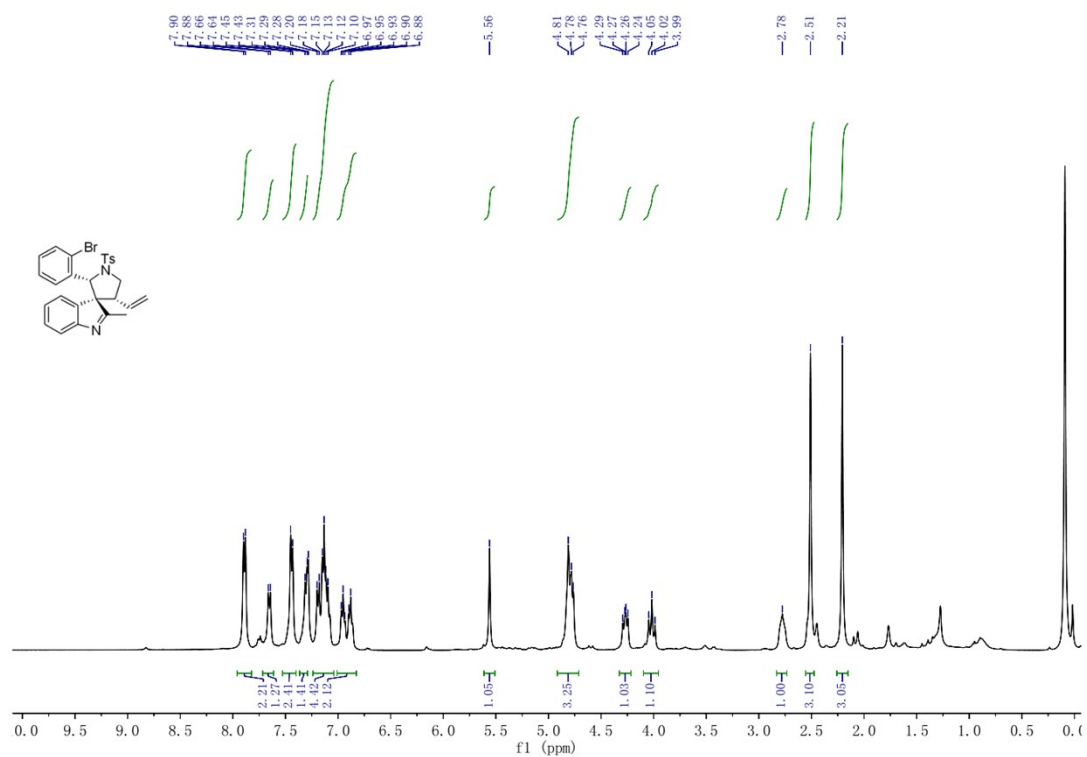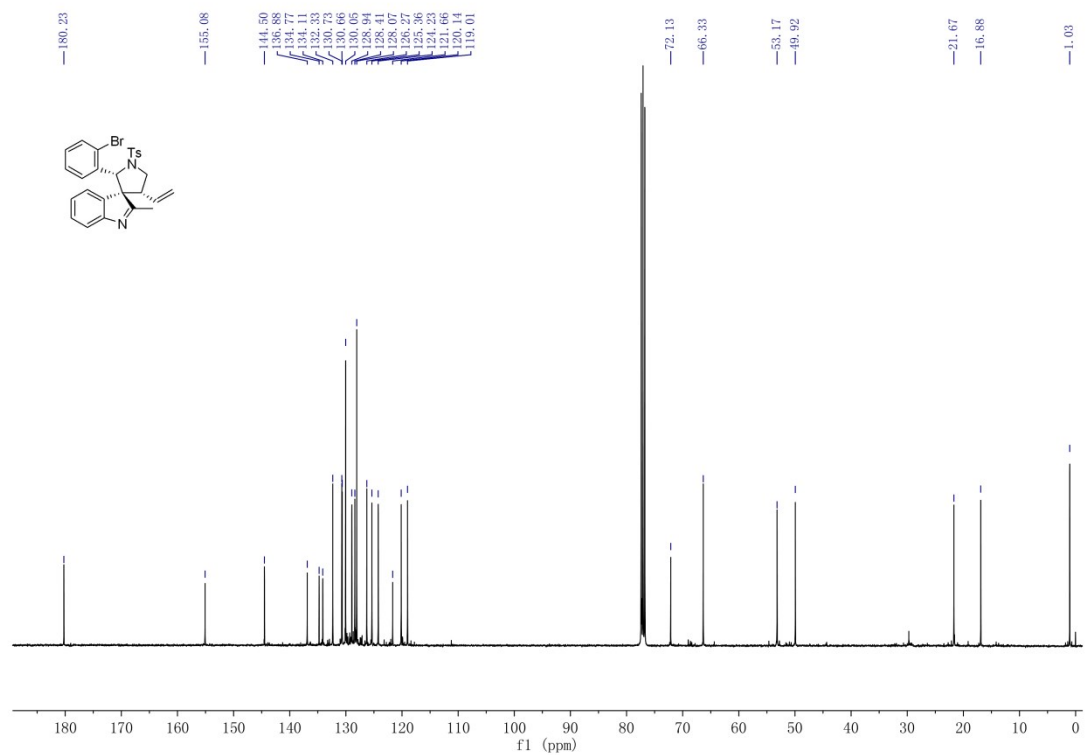

**(2'S,3S,4'R)-2-methyl-1'-tosyl-2'-(2-(trifluoromethyl)phenyl)-4'-vinylspiro[indole-3,3'-pyrrolidine] (3f)**

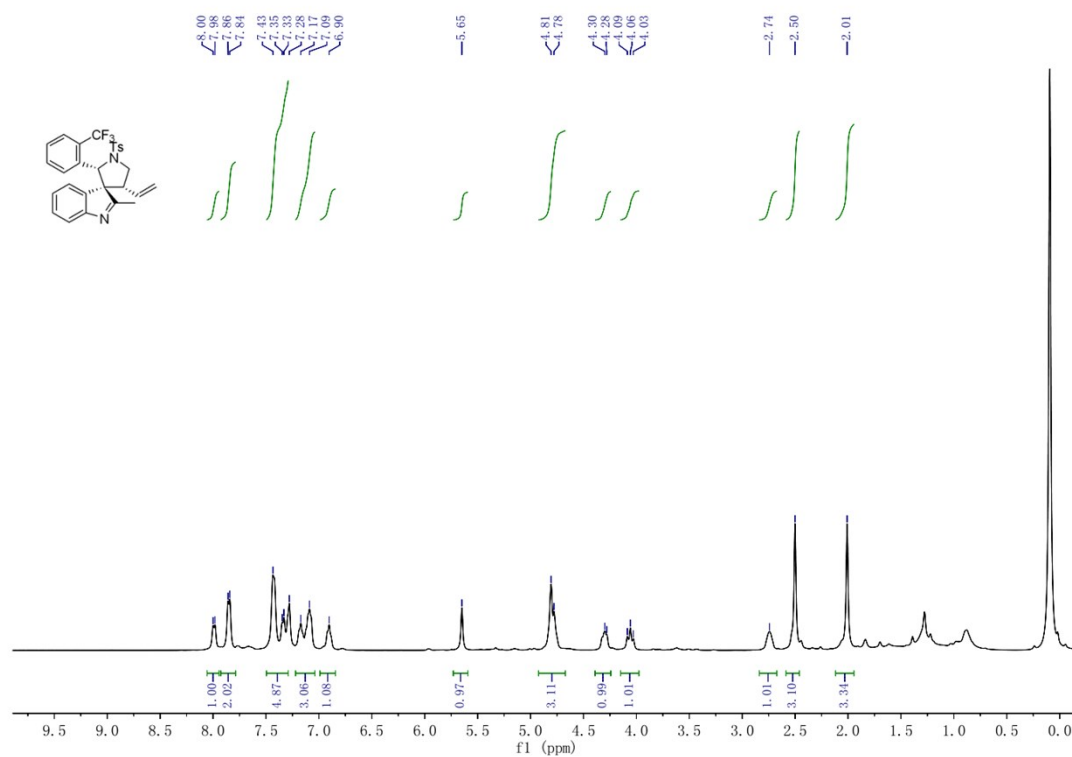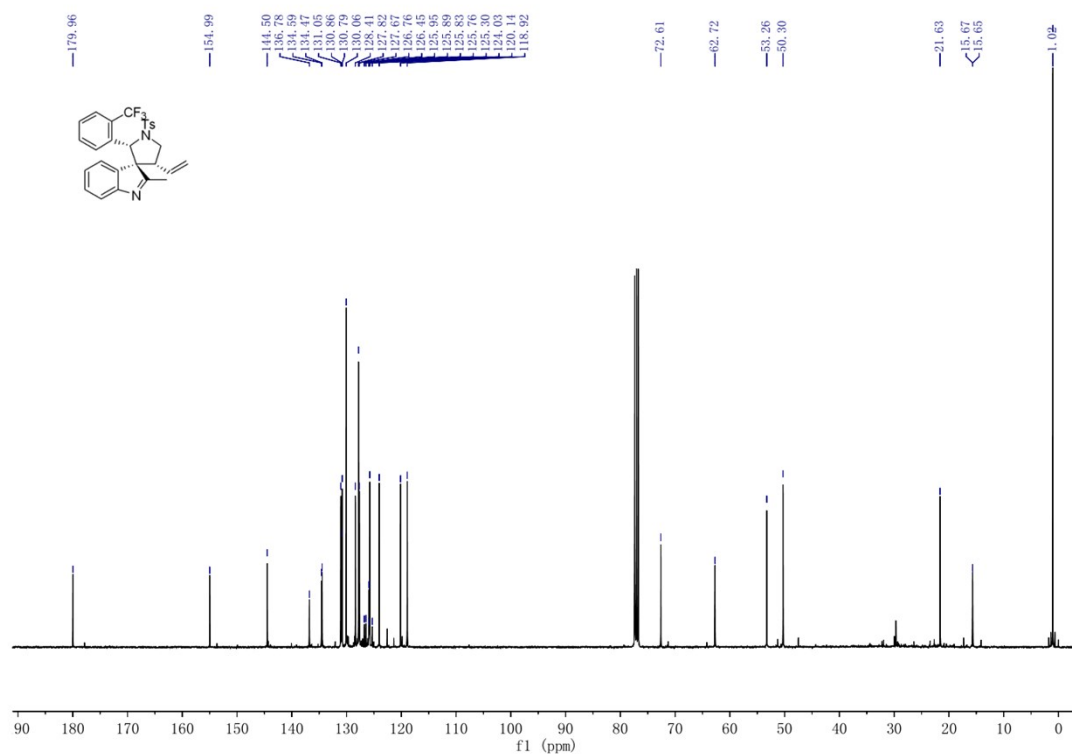



**(2'S,3S,4'R)-2-methyl-2'-(m-tolyl)-1'-tosyl-4'-vinylspiro[indole-3,3'-pyrrolidine]**  
**(3g)**

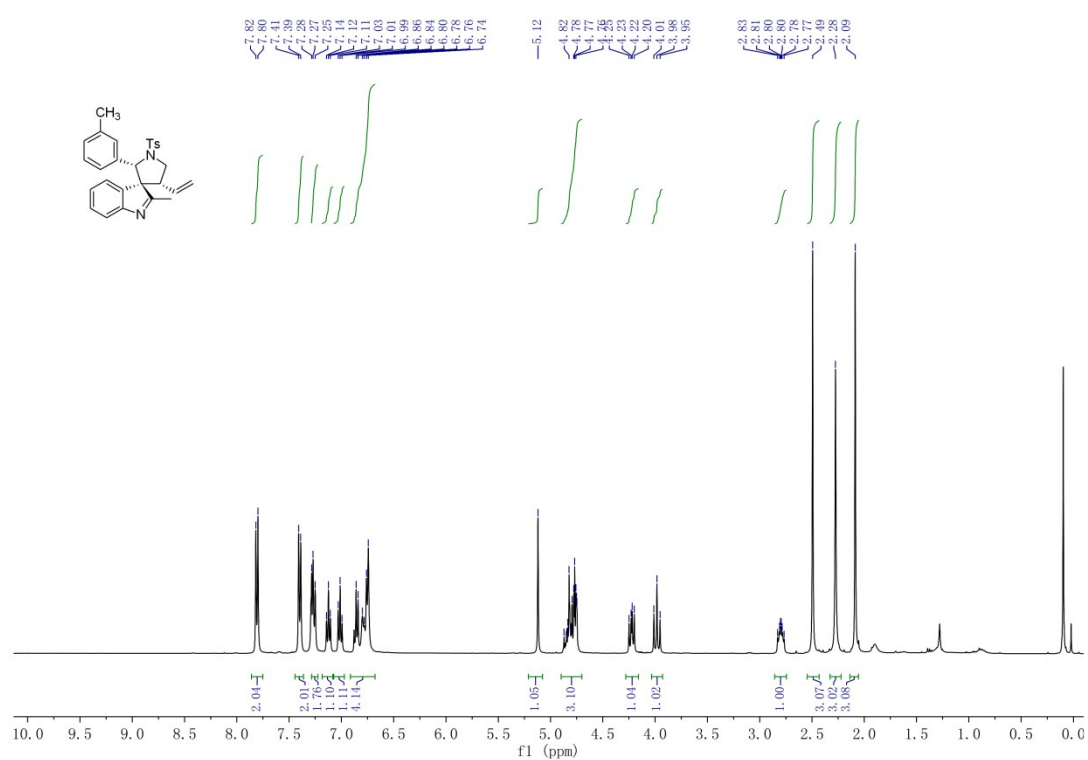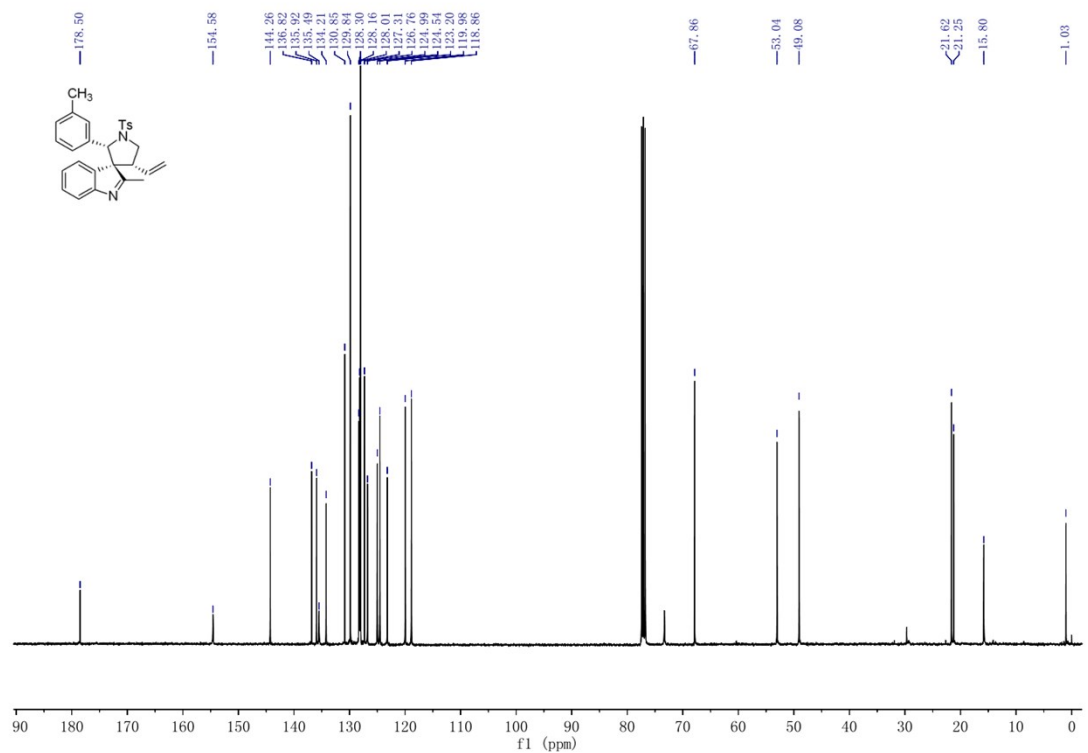

**(2'S,3S,4'R)-2'-(3-methoxyphenyl)-2-methyl-1'-tosyl-4'-vinylspiro[indole-3,3'-pyrrolidine] (3h)**

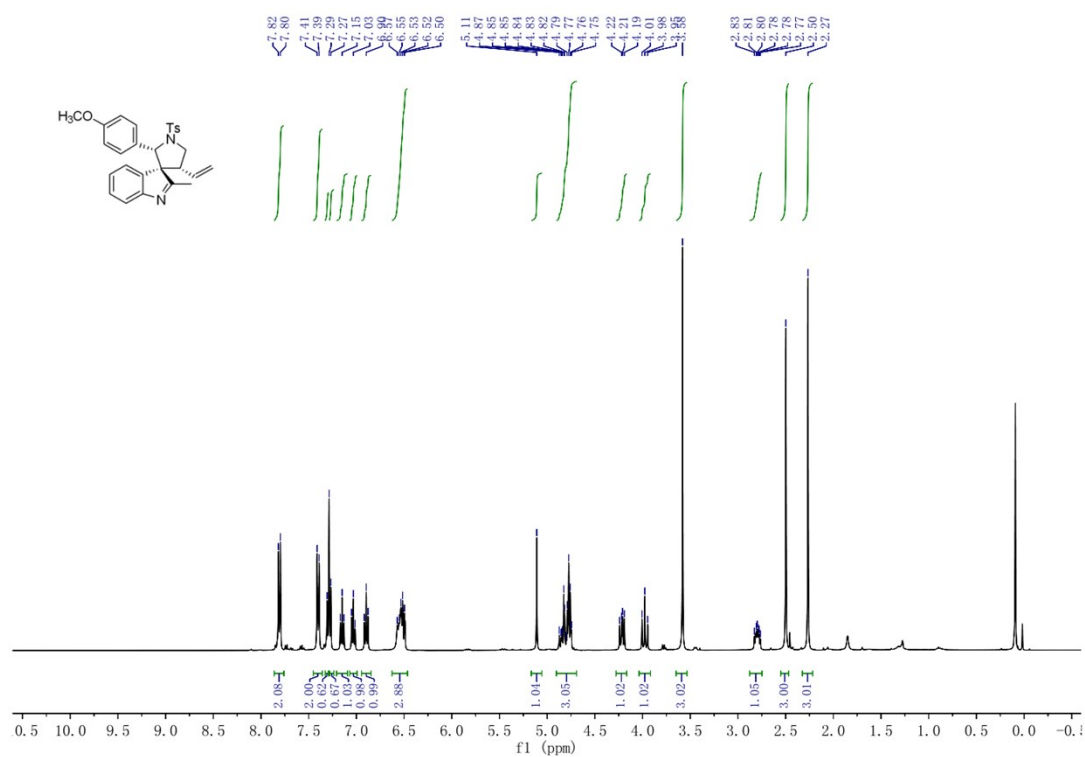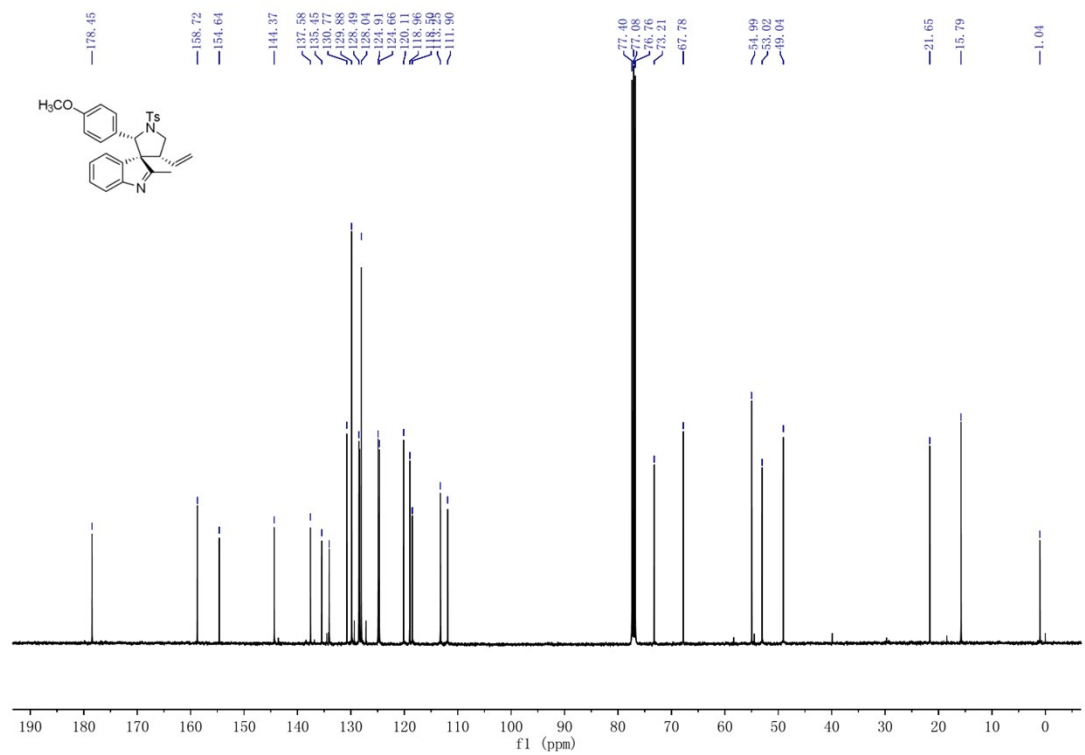

**(2'S,3S,4'R)-2'-(3-chlorophenyl)-2-methyl-1'-tosyl-4'-vinylspiro[indole-3,3'-pyrrolidine] (3i)**

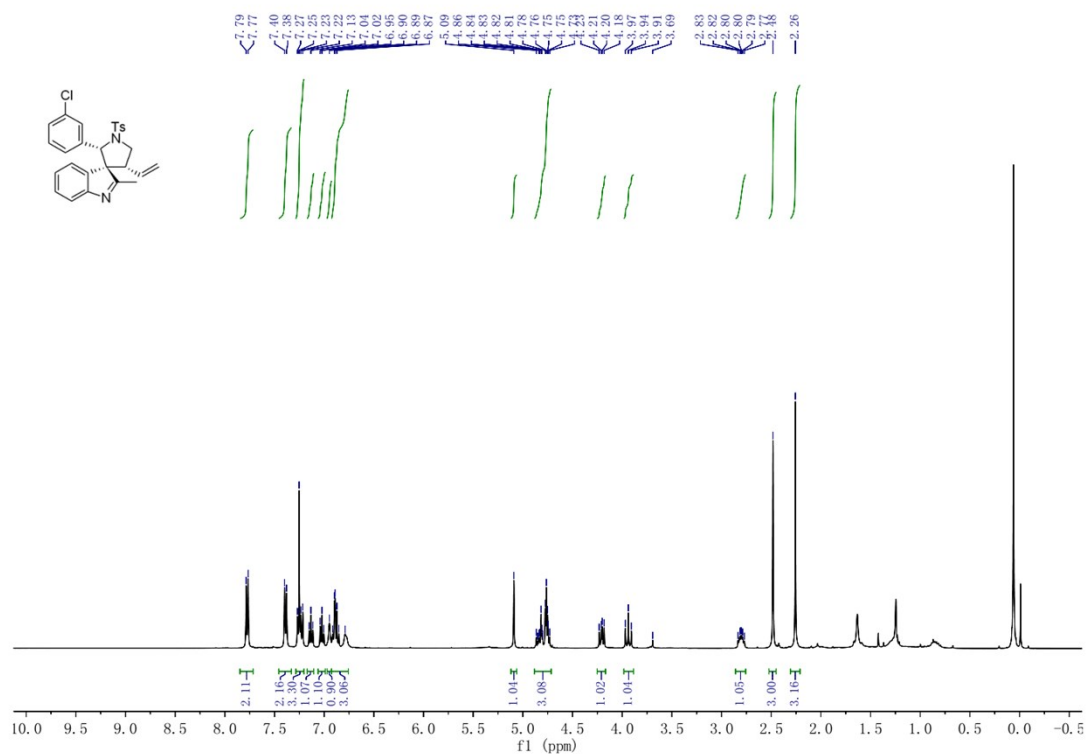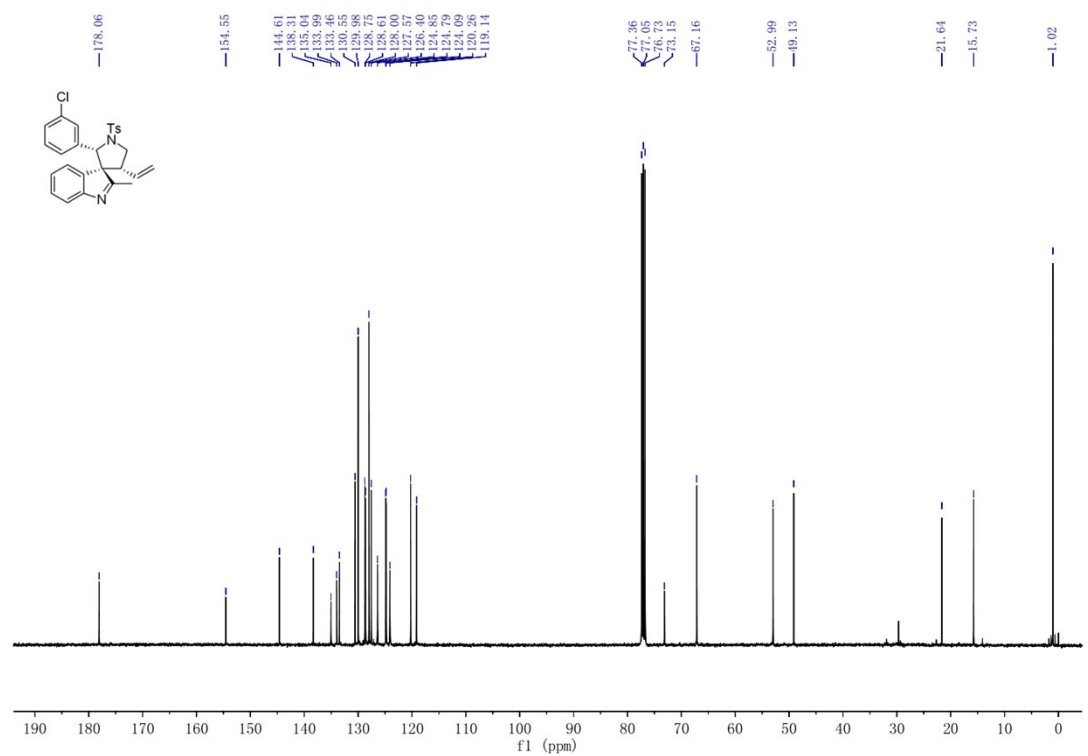

**(2'S,3S,4'R)-2-methyl-1'-tosyl-2'-(3-(trifluoromethyl)phenyl)-4'-vinylspiro[indole-3,3'-pyrrolidine] (3j)**

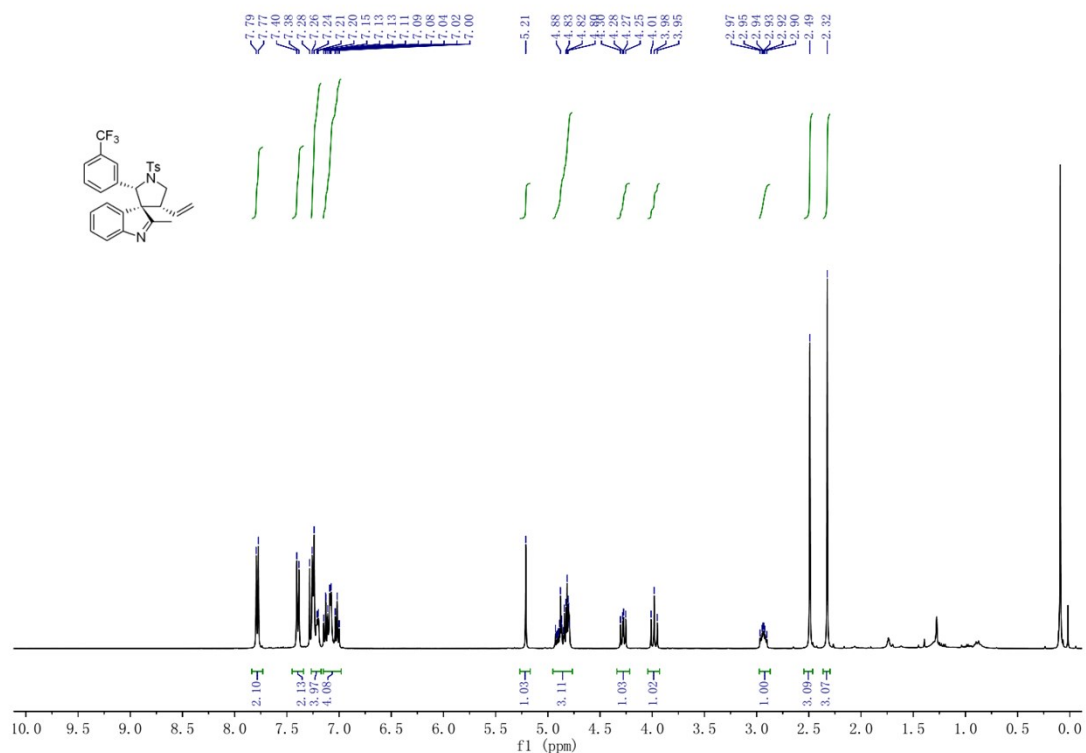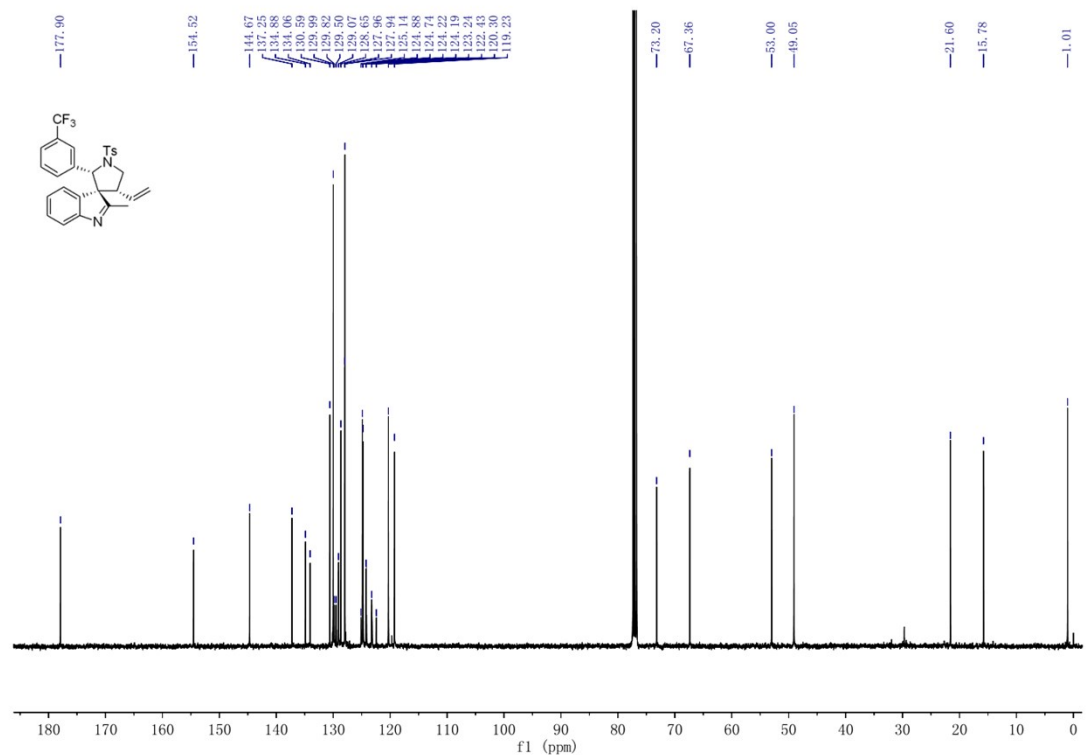

**(2'S,3S,4'R)-2-methyl-2'-(p-tolyl)-1'-tosyl-4'-vinylspiro[indole-3,3'-pyrrolidine]**

**(3k)**

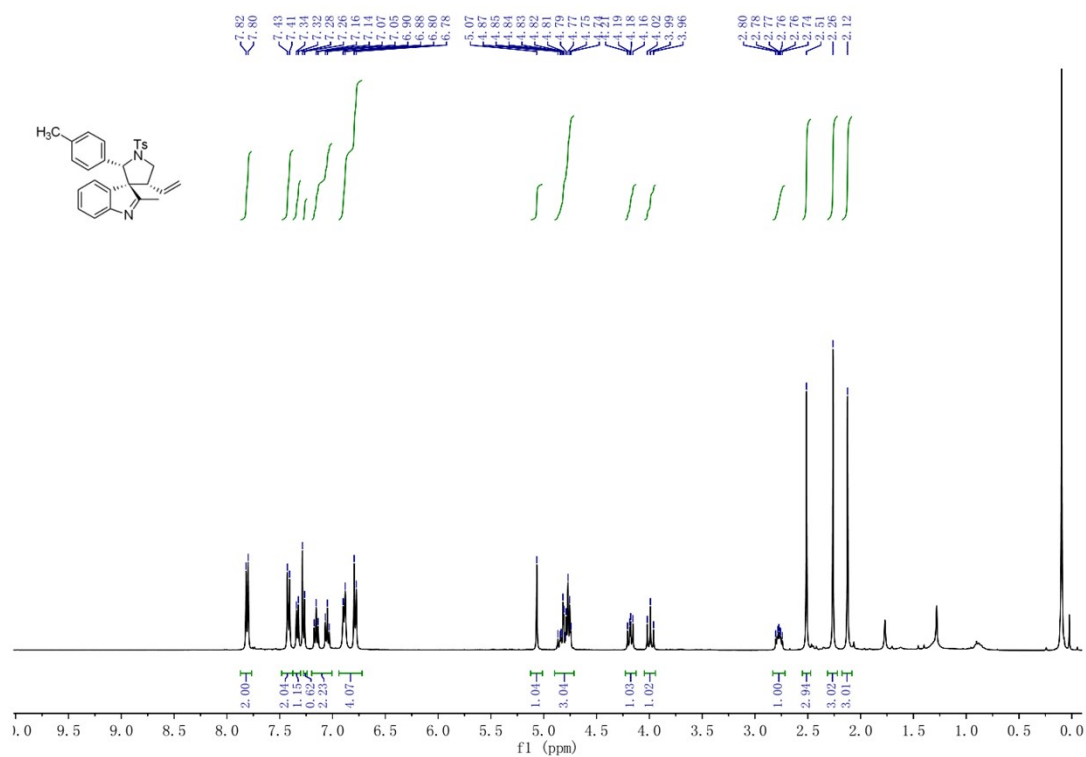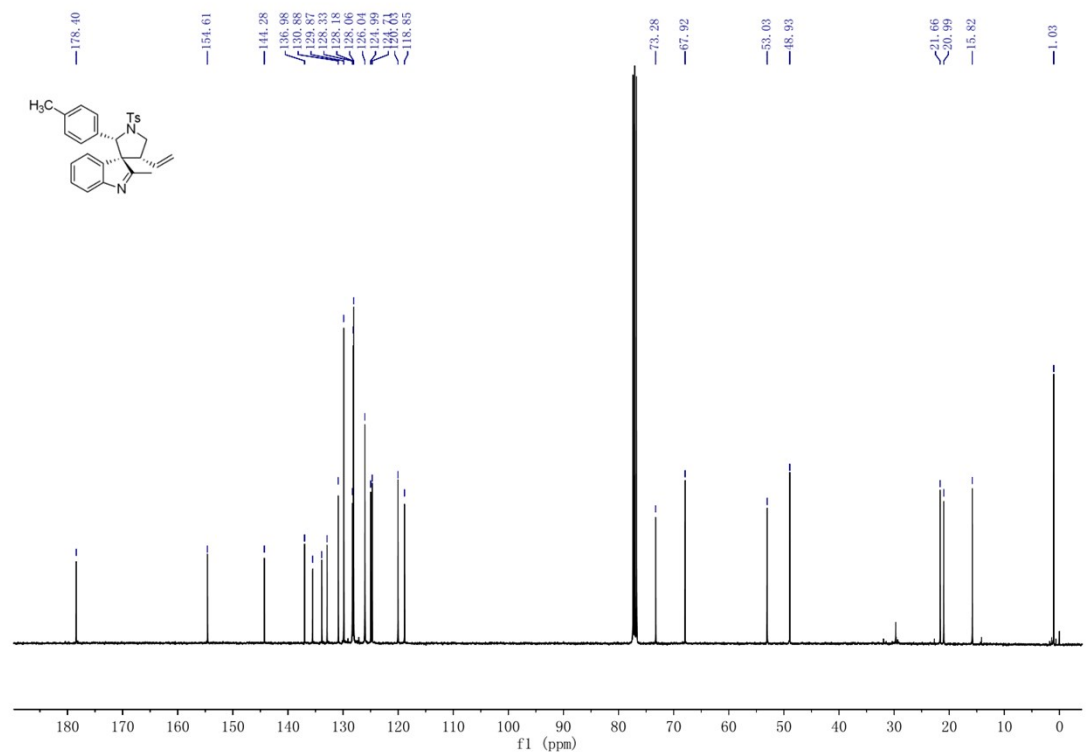

**(2'S,3S,4'R)-2'-(4-(tert-butyl)phenyl)-2-methyl-1'-tosyl-4'-vinylspiro[indole-3,3'-pyrrolidine] (3l)**

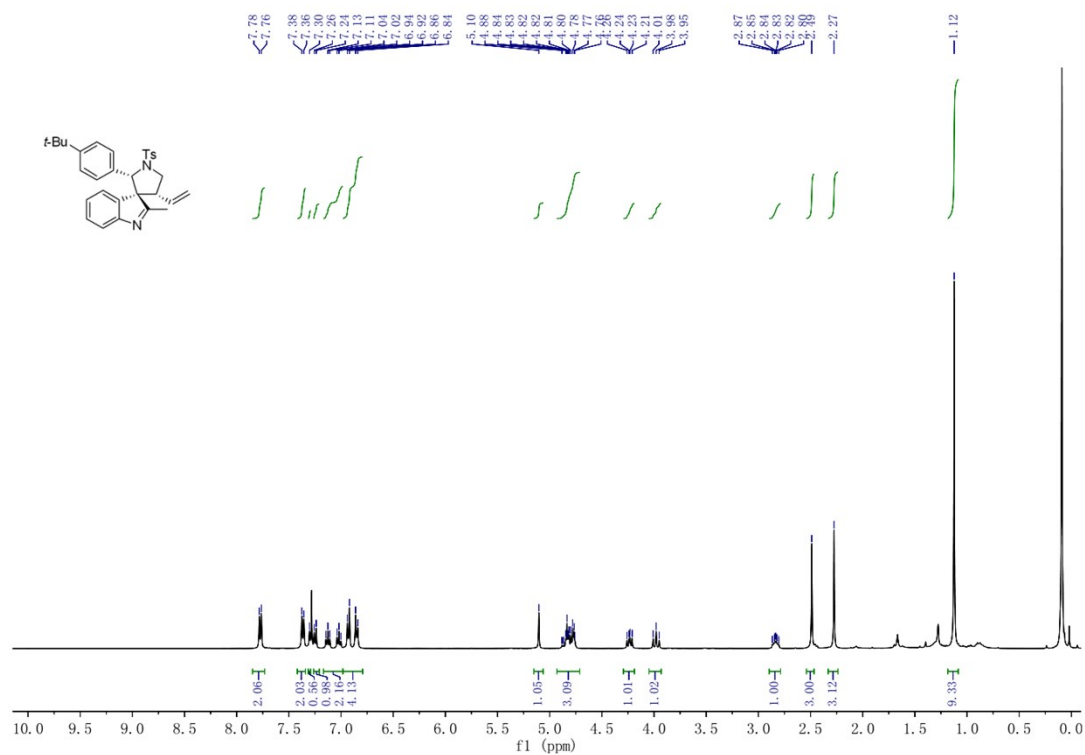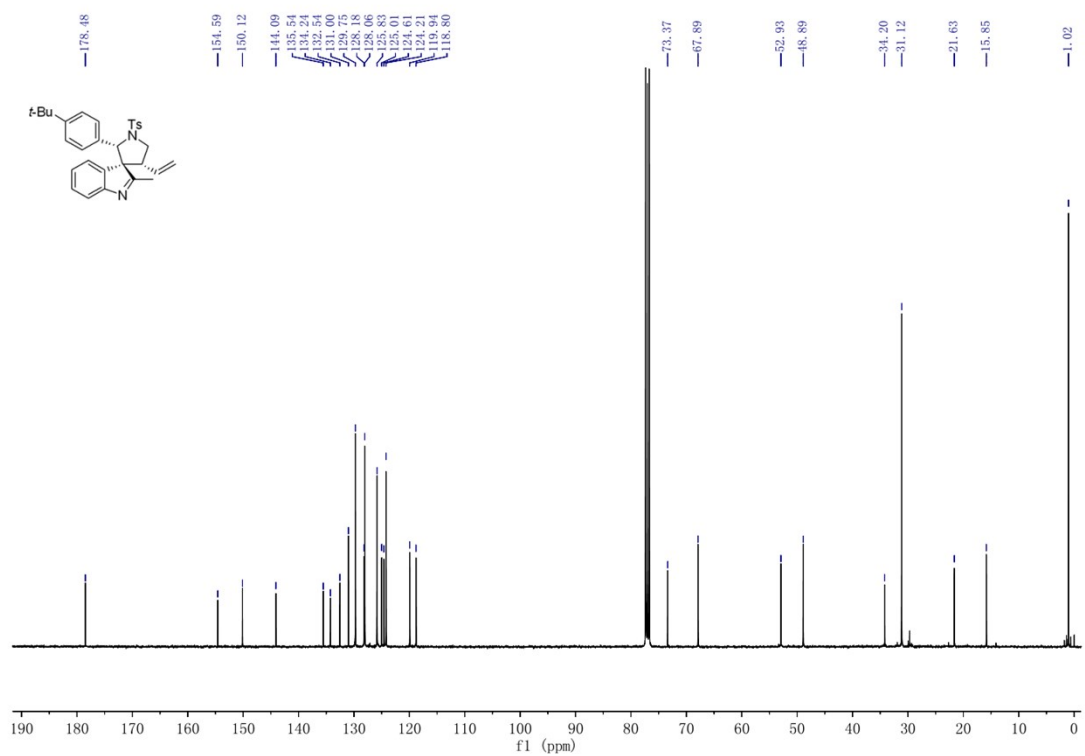

**(2'S,3S,4'R)-2'-(4-methoxyphenyl)-2-methyl-1'-tosyl-4'-vinylspiro[indole-3,3'-pyrrolidine] (3m)**

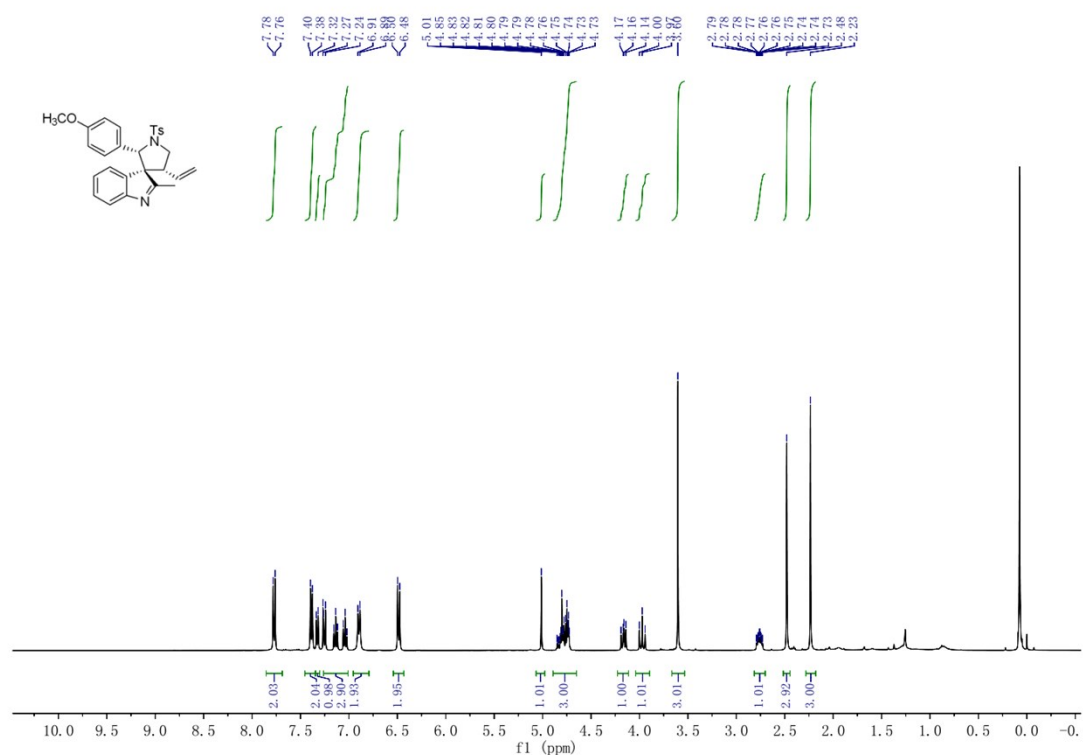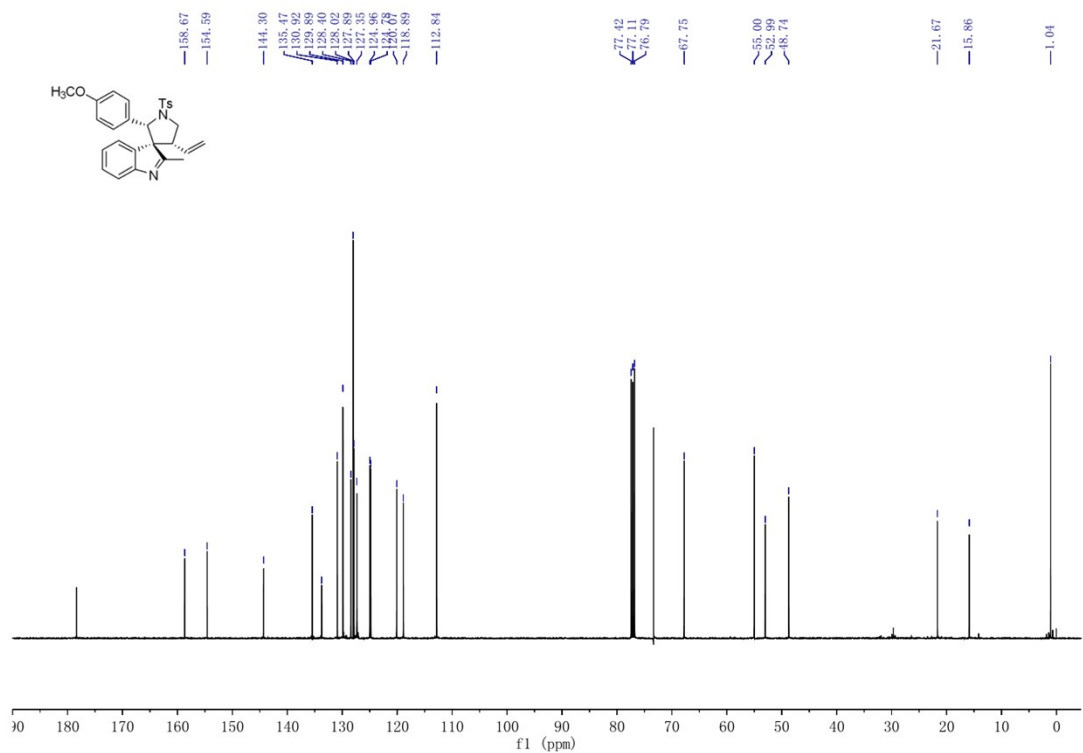

**(2'S,3S,4'R)-2'-(4-fluorophenyl)-2-methyl-1'-tosyl-4'-vinylspiro[indole-3,3'-pyrrolidine] (3n)**

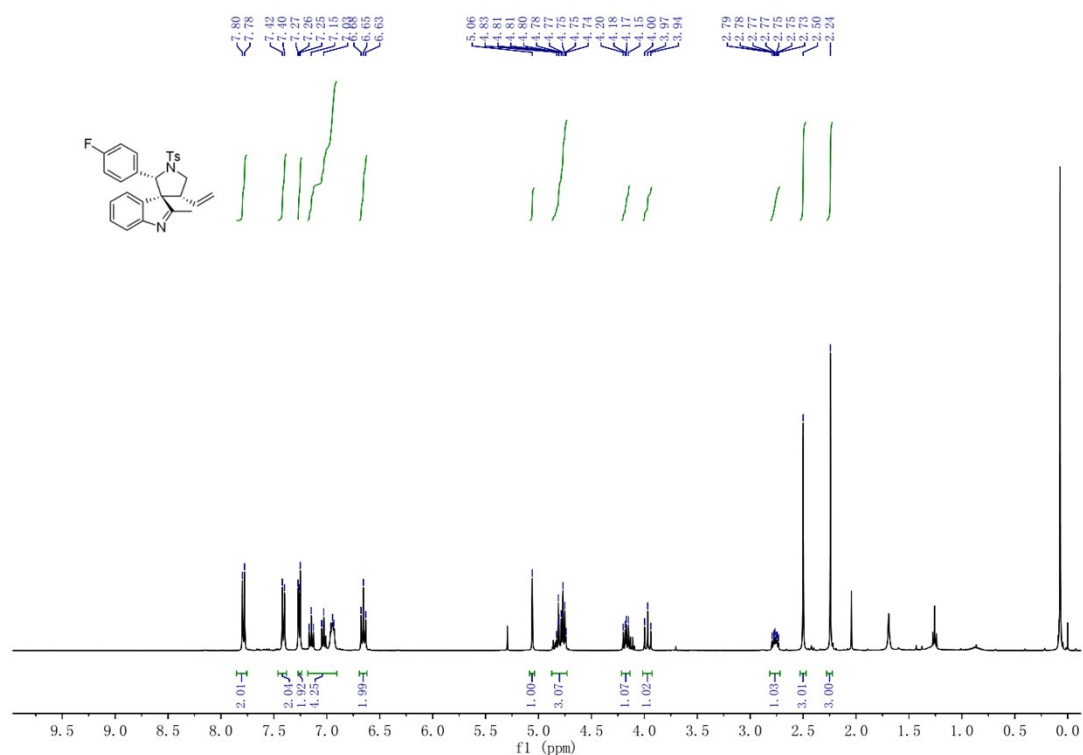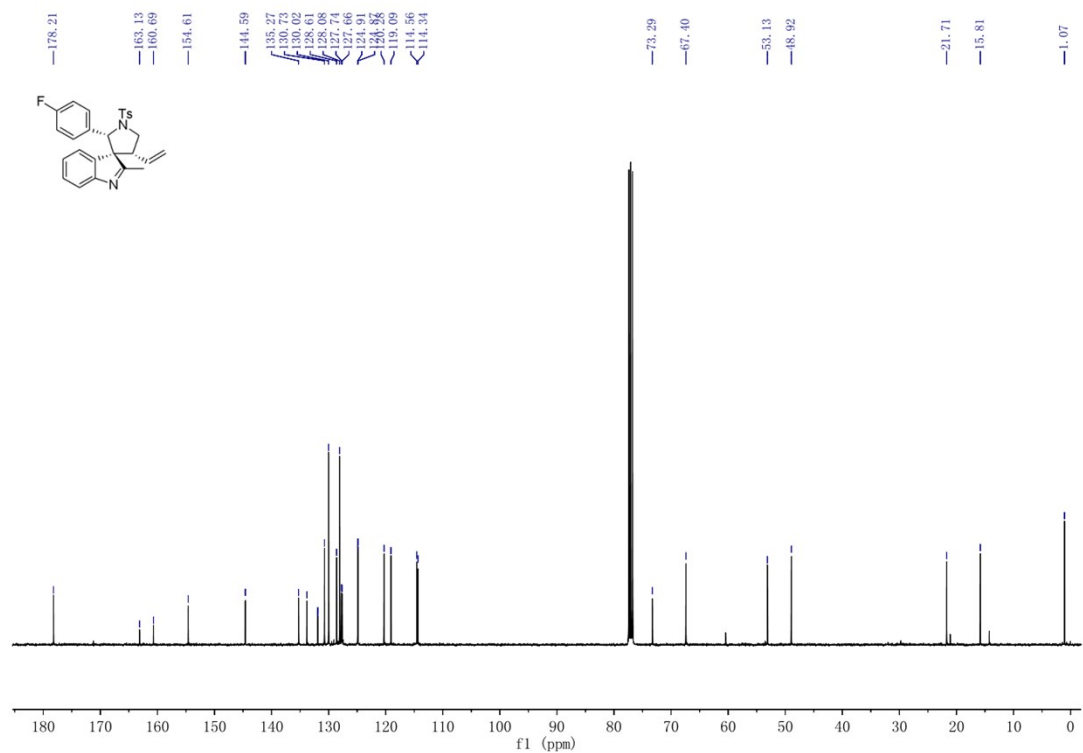



**(2'S,3S,4'R)-2'-(4-chlorophenyl)-2-methyl-1'-tosyl-4'-vinylspiro[indole-3,3'-pyrrolidine] (3o)**

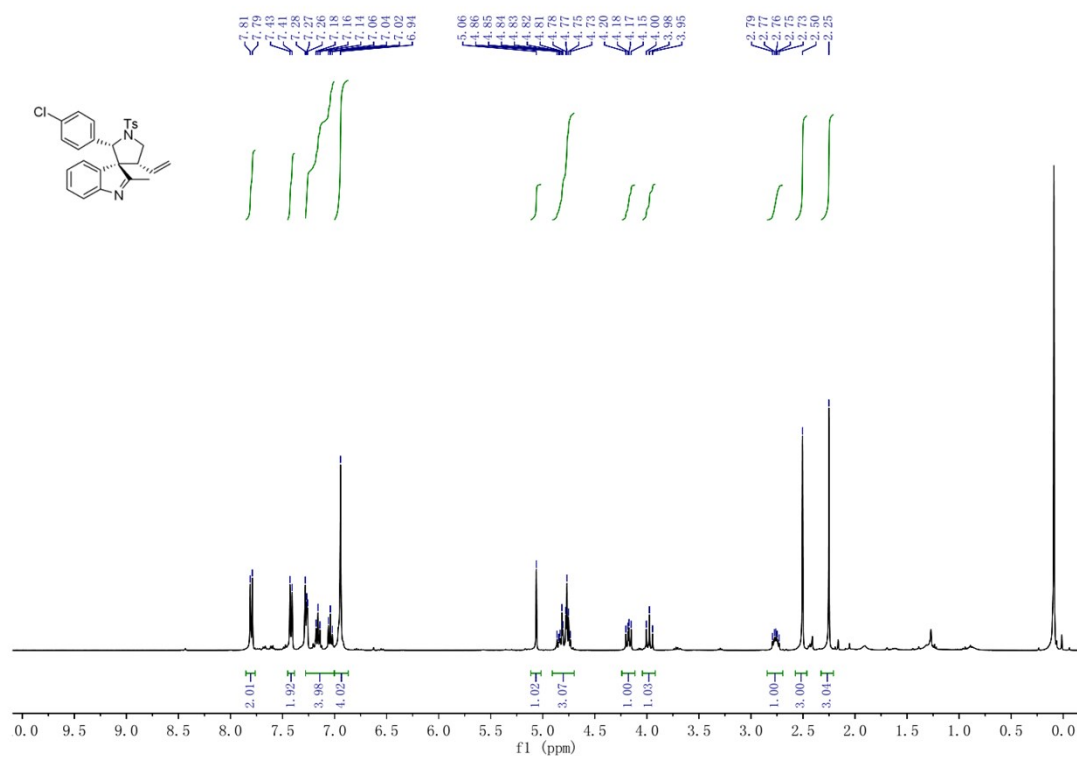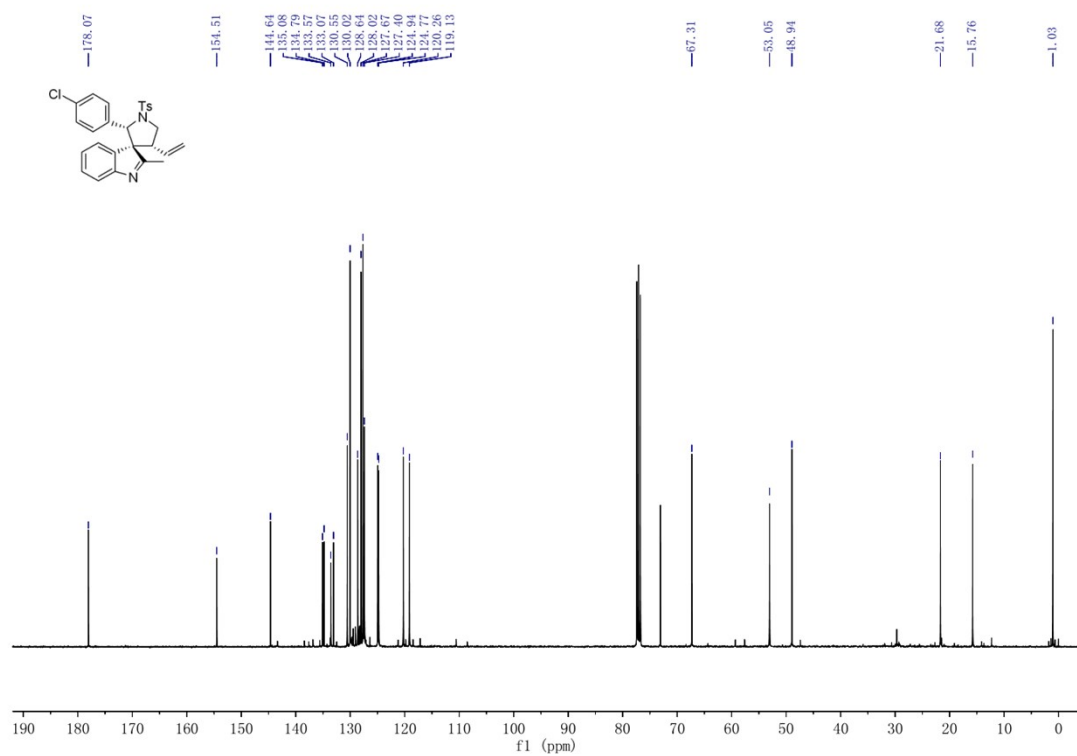

**(2'S,3S,4'R)-2'-(4-bromophenyl)-2-methyl-1'-tosyl-4'-vinylspiro[indole-3,3'-pyrrolidine] (3p)**

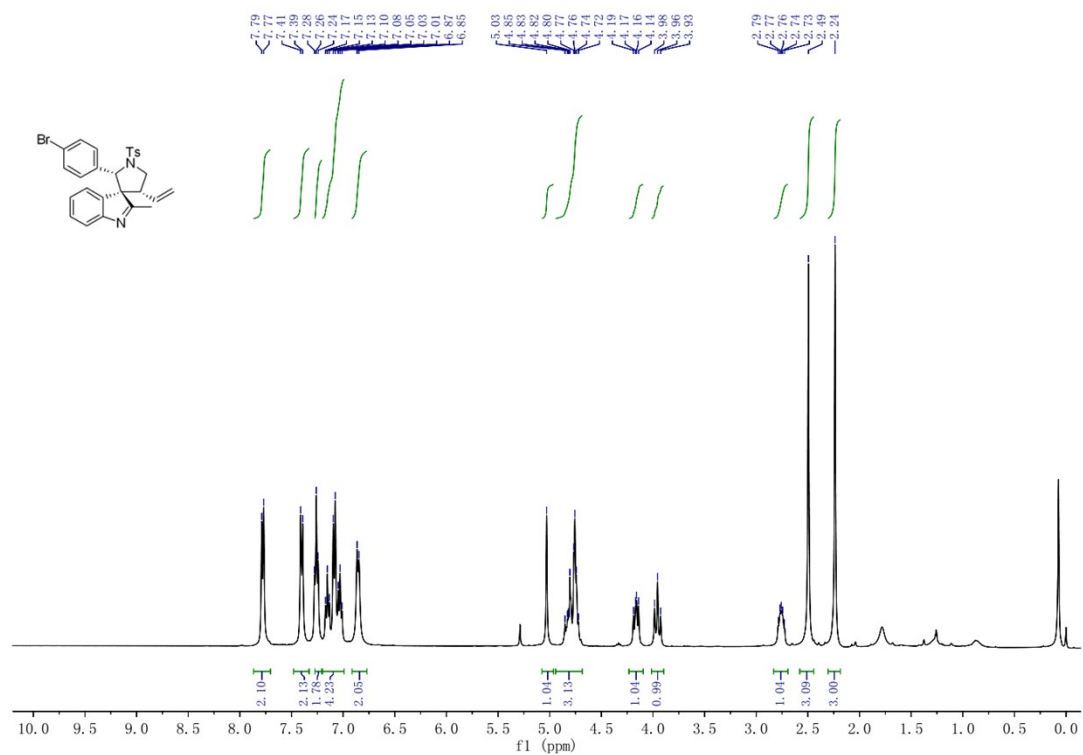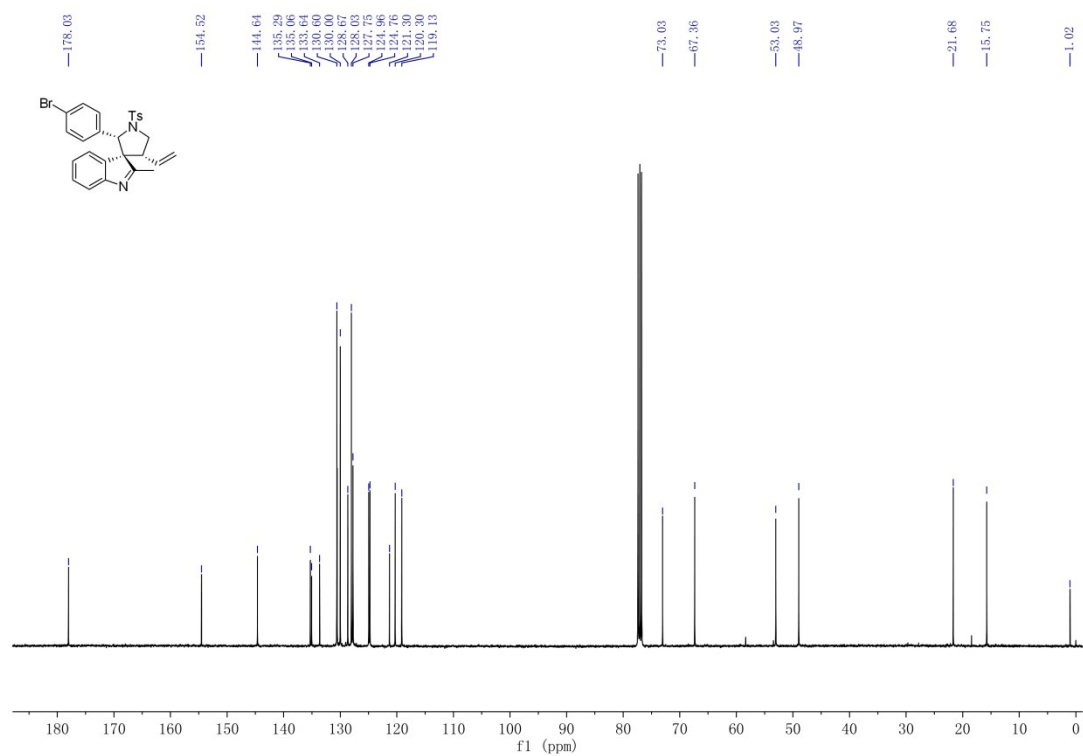

**(2'S,3S,4'R)-2-methyl-2'-(naphthalen-2-yl)-1'-tosyl-4'-vinylspiro[indole-3,3'-pyrrolidine] (3q)**

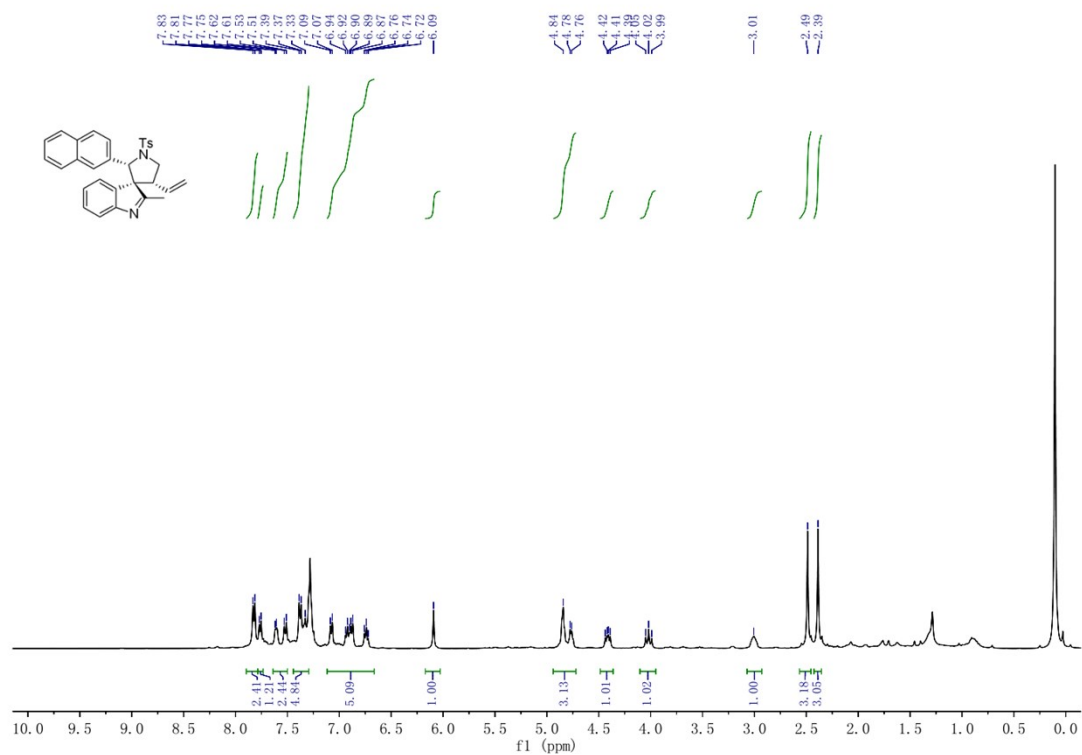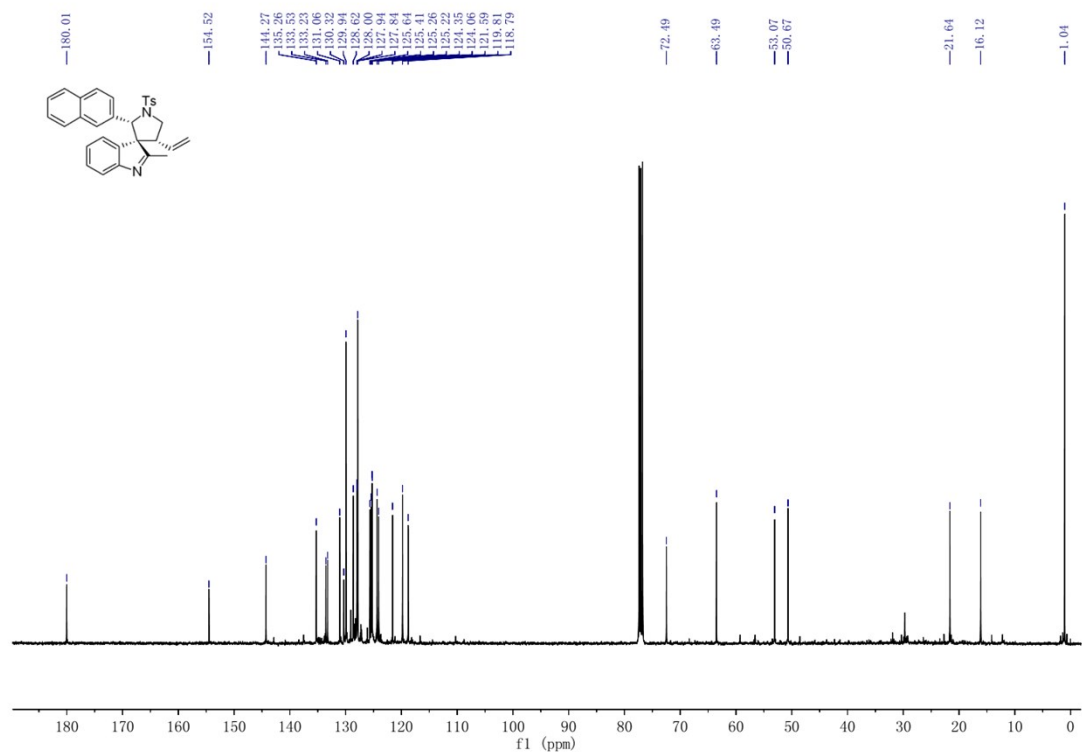

**(2'S,3S,4'R)-2,5-dimethyl-2'-phenyl-1'-tosyl-4'-vinylspiro[indole-3,3'-pyrrolidine]**  
**(3r)**

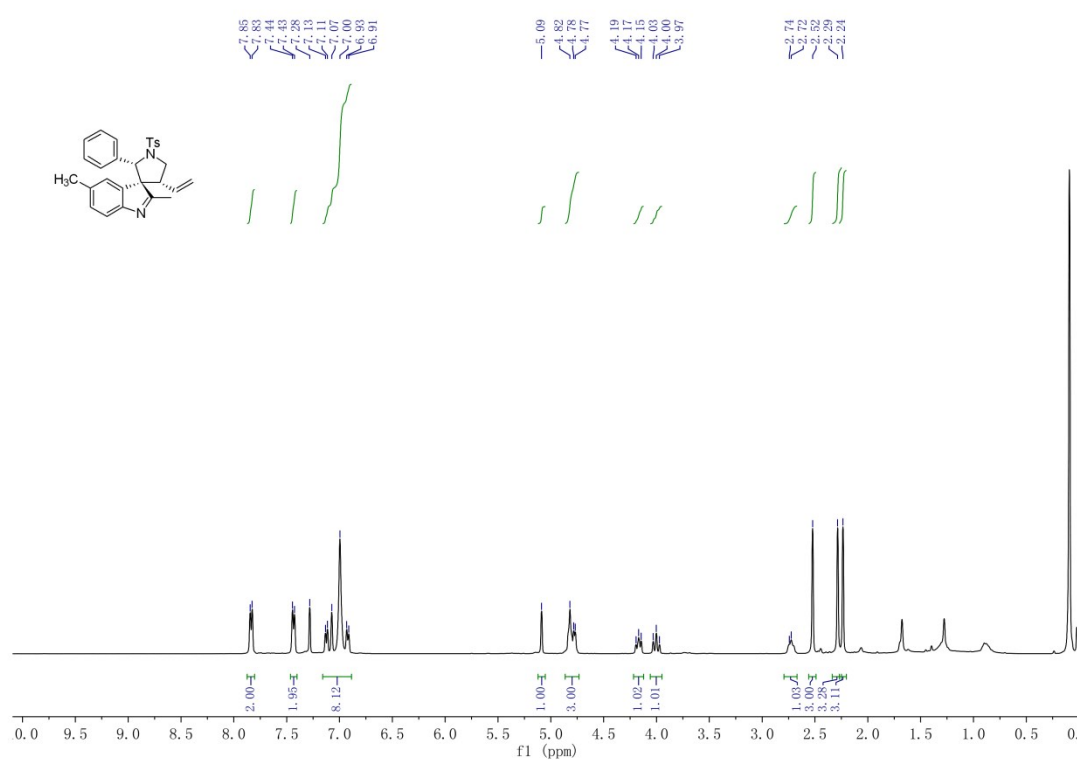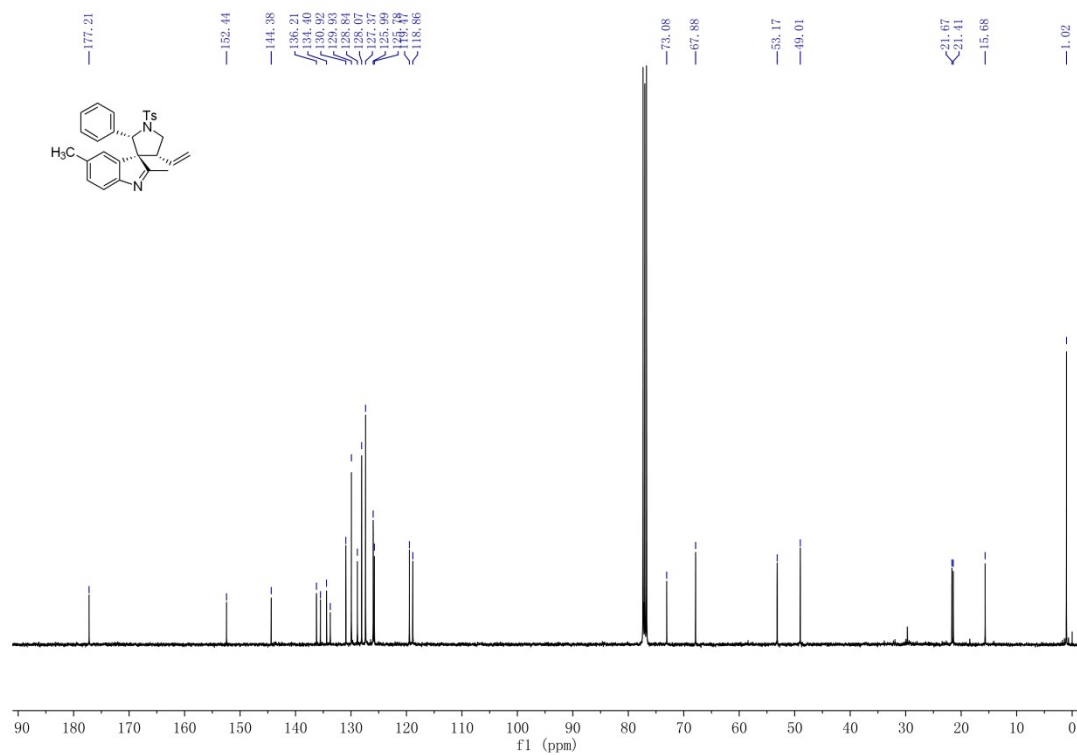

**(2'S,3S,4'R)-5-methoxy-2-methyl-2'-phenyl-1'-tosyl-4'-vinylspiro[indole-3,3'-pyrrolidine] (3s)**

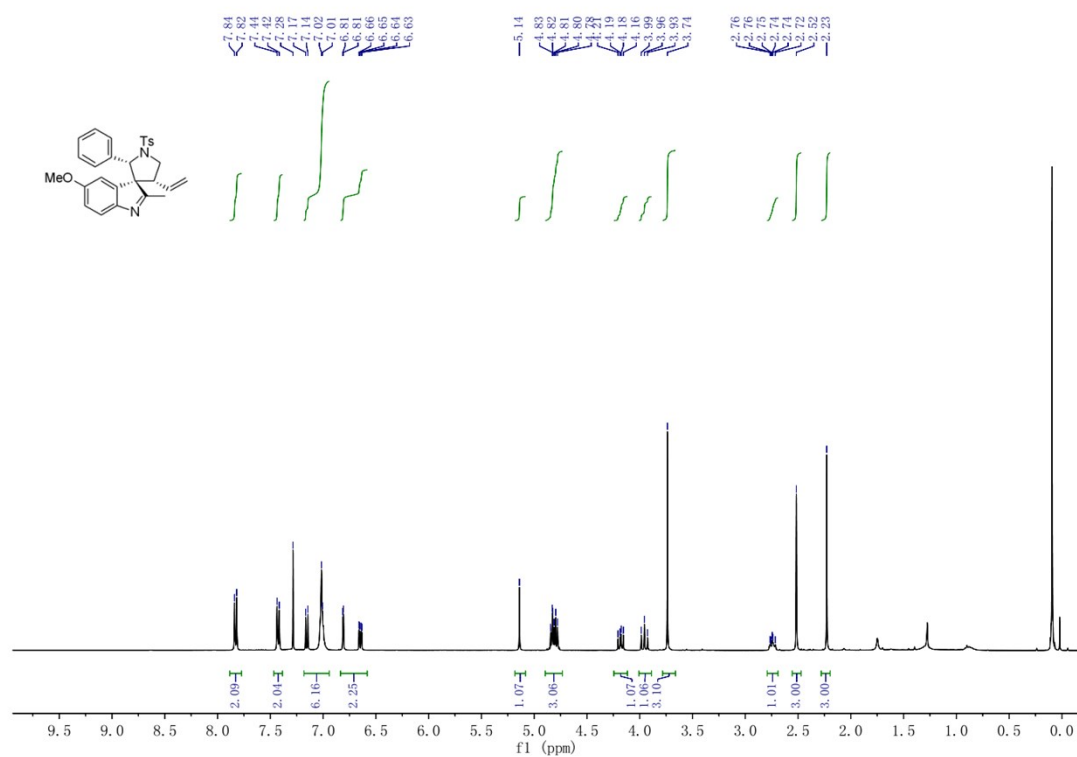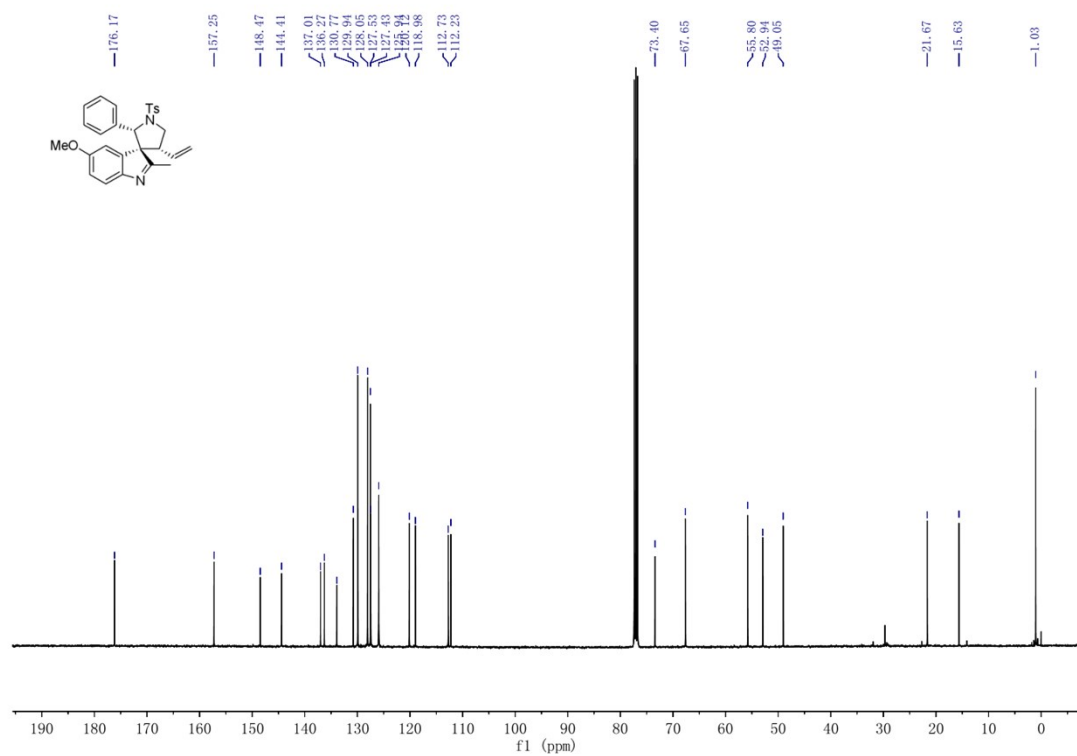

**(2'S,3S,4'R)-5-fluoro-2-methyl-2'-phenyl-1'-tosyl-4'-vinylspiro[indole-3,3'-pyrrolidine] (3t)**

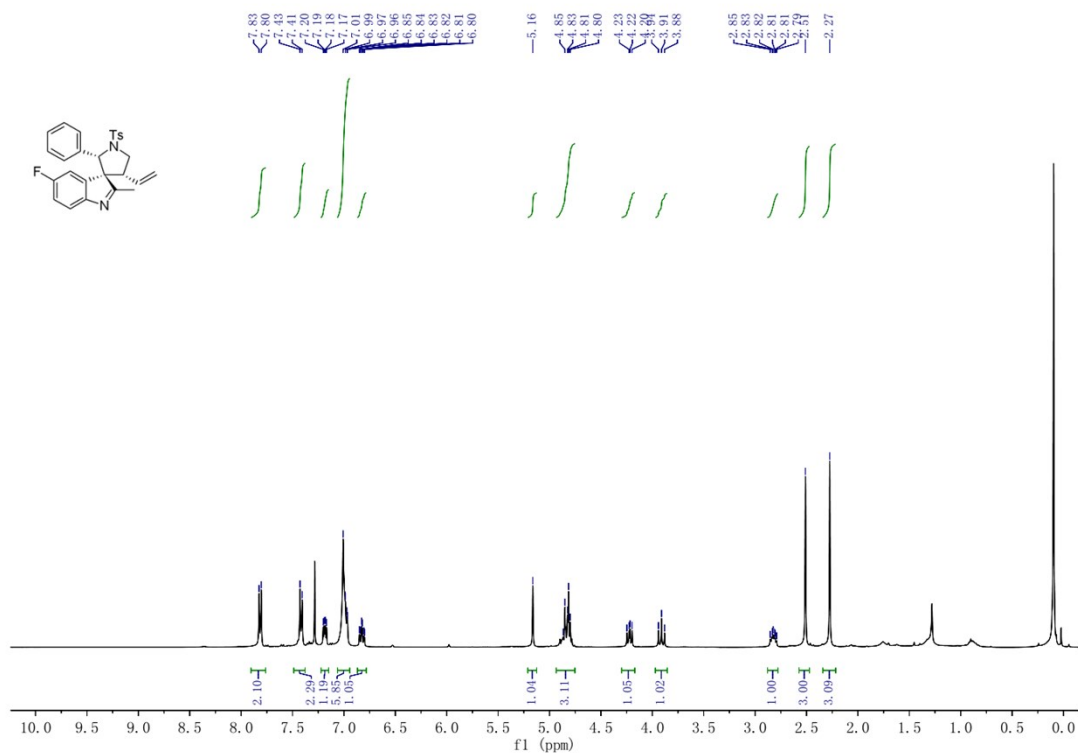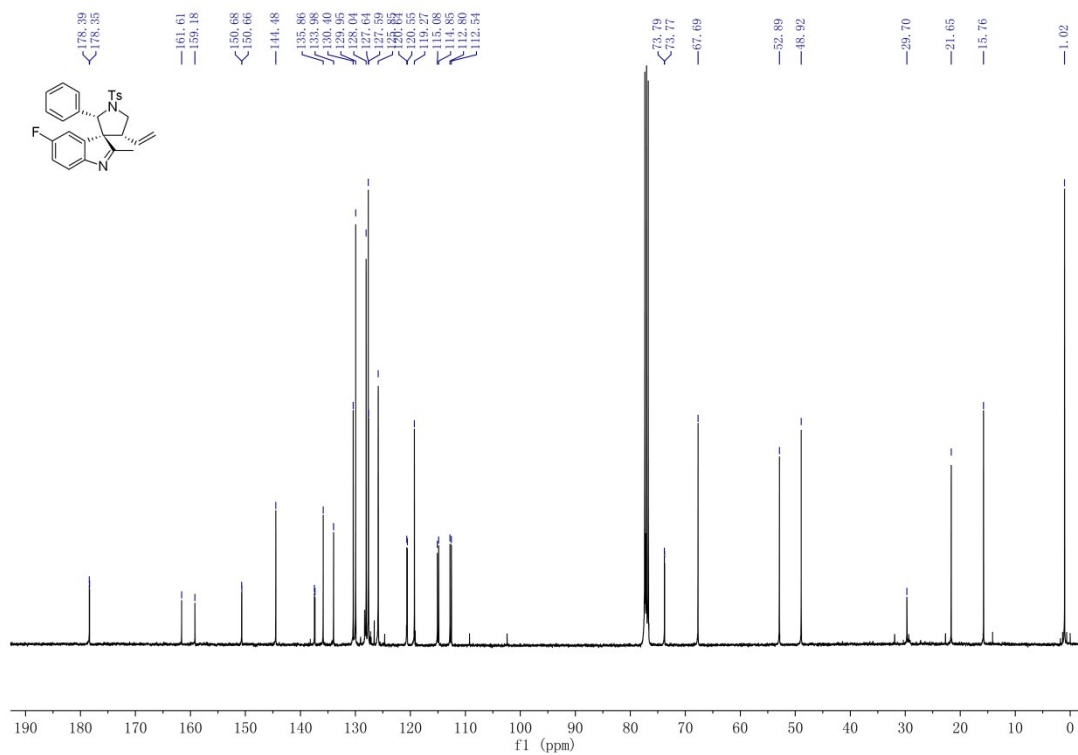

**(2'S,3S,4'R)-5-chloro-2-methyl-2'-phenyl-1'-tosyl-4'-vinylspiro[indole-3,3'-pyrrolidine] (3u)**

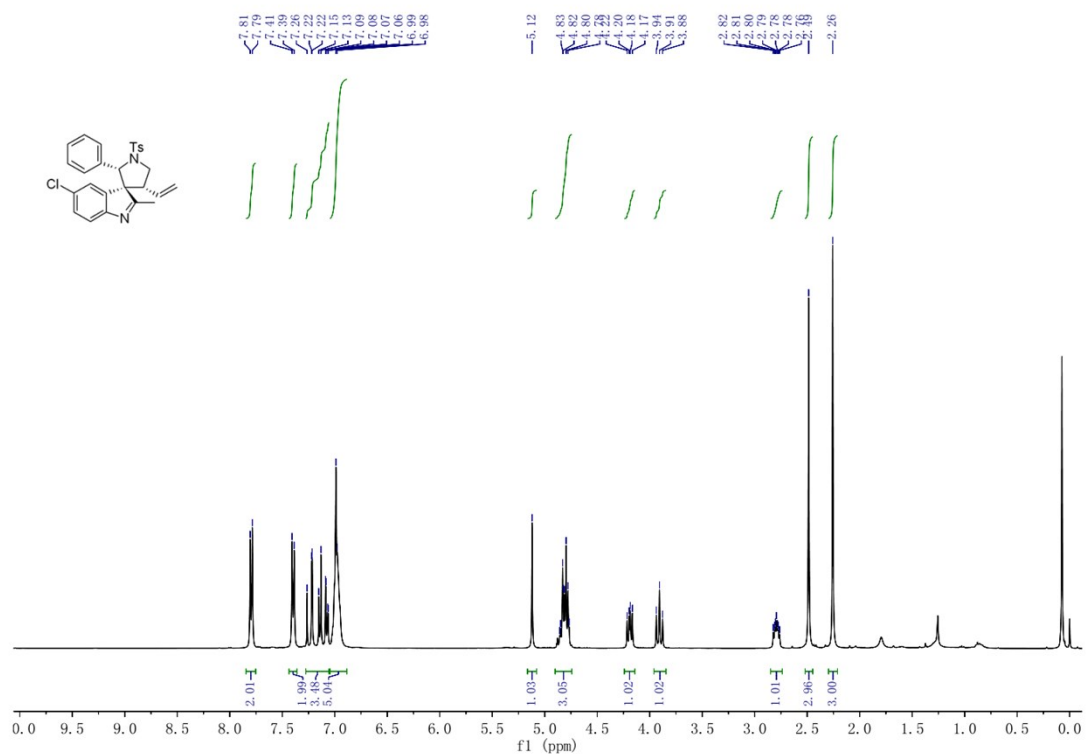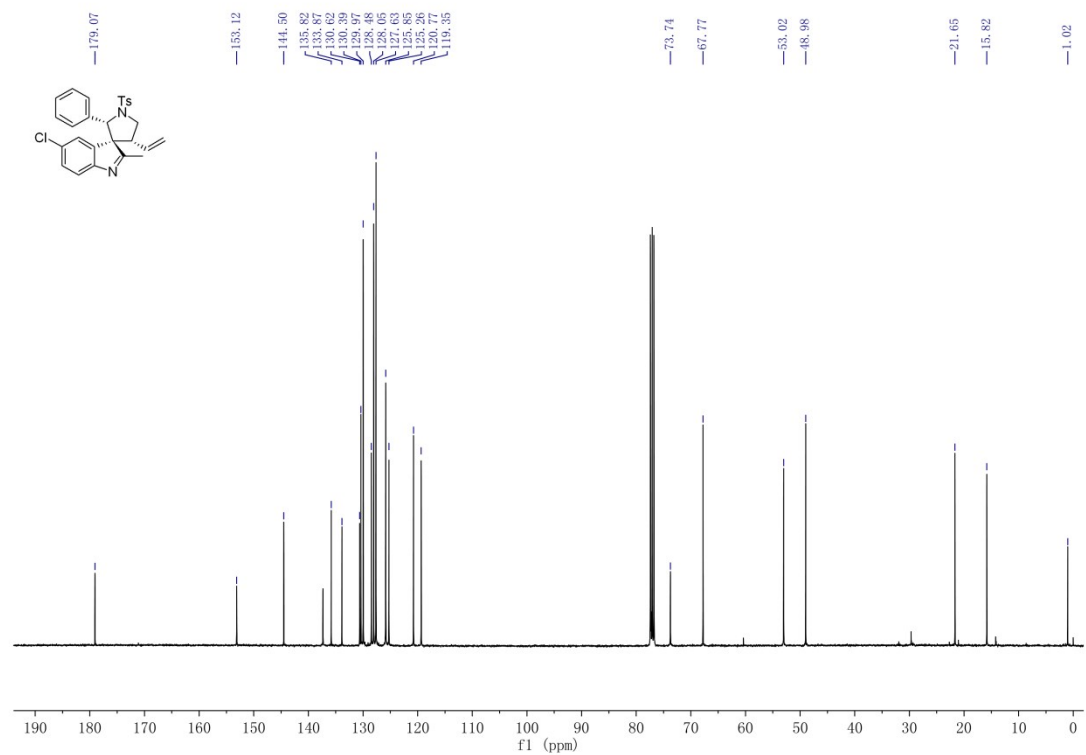

**(2'S,3S,4'R)-5-bromo-2-methyl-2'-phenyl-1'-tosyl-4'-vinylspiro[indole-3,3'-pyrrolidine] (3v)**

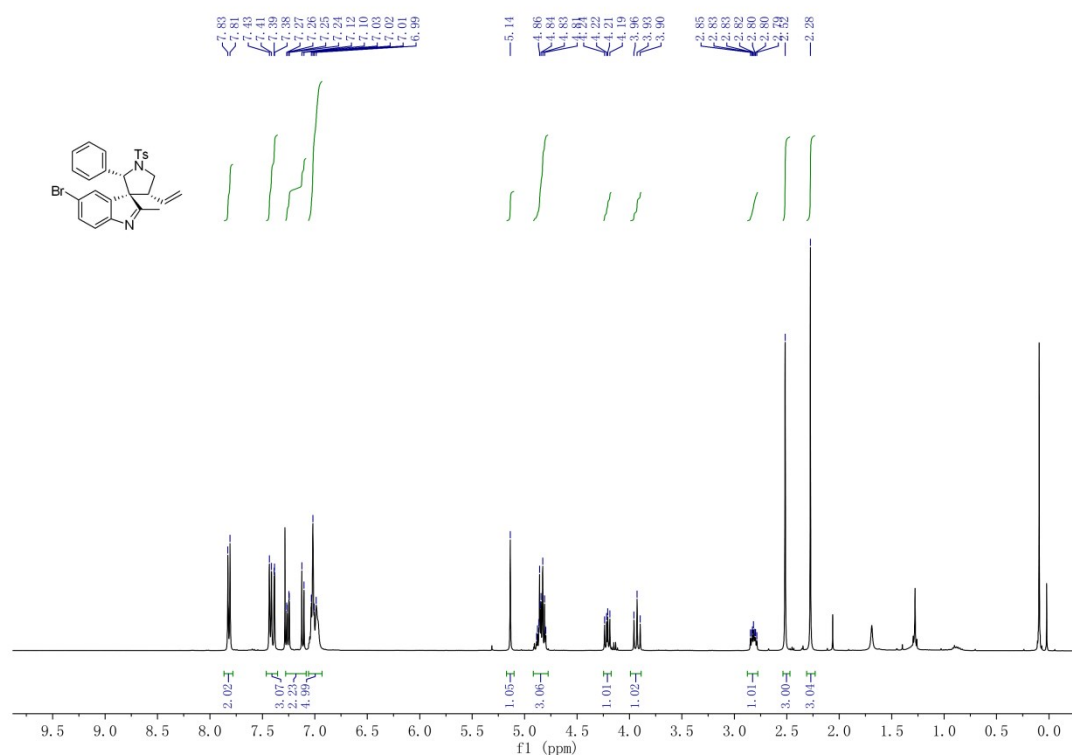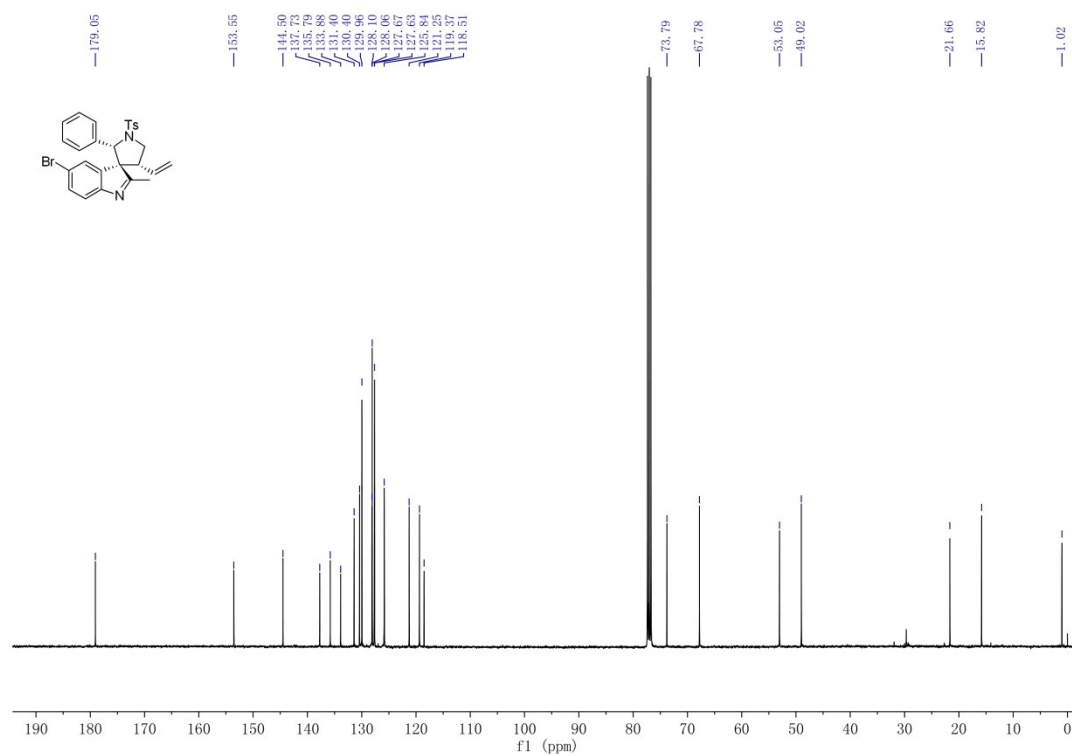



**(2'S,3S,4'R)-6-fluoro-2-methyl-2'-phenyl-1'-tosyl-4'-vinylspiro[indole-3,3'-pyrrolidine] (3w)**

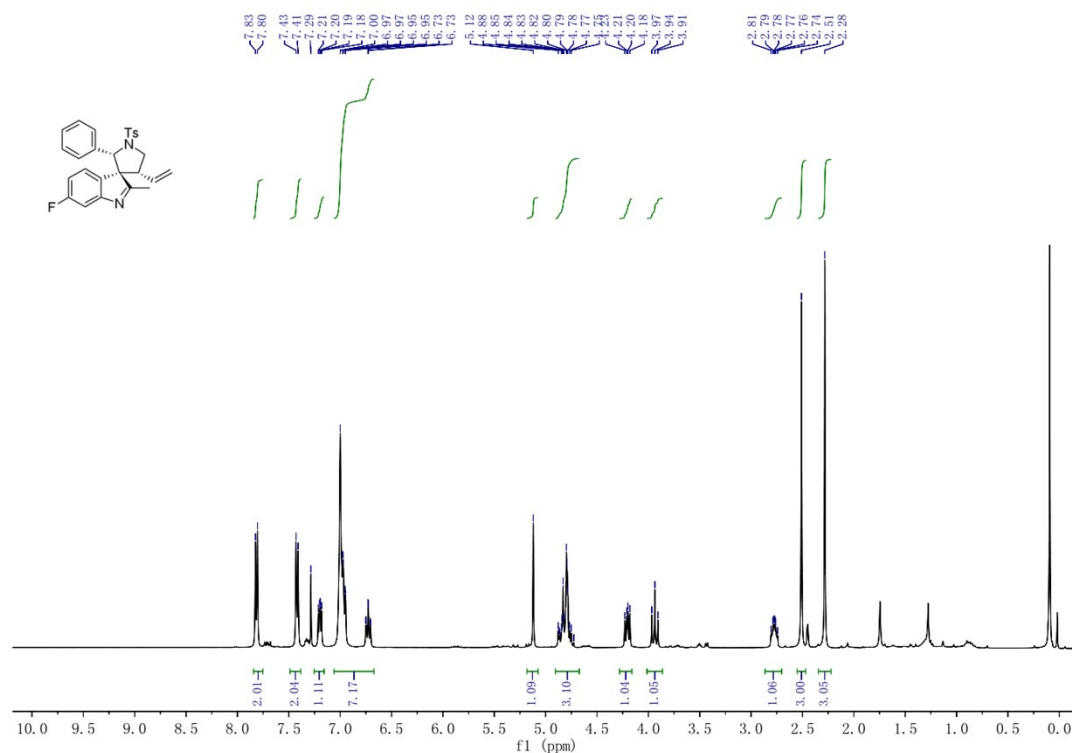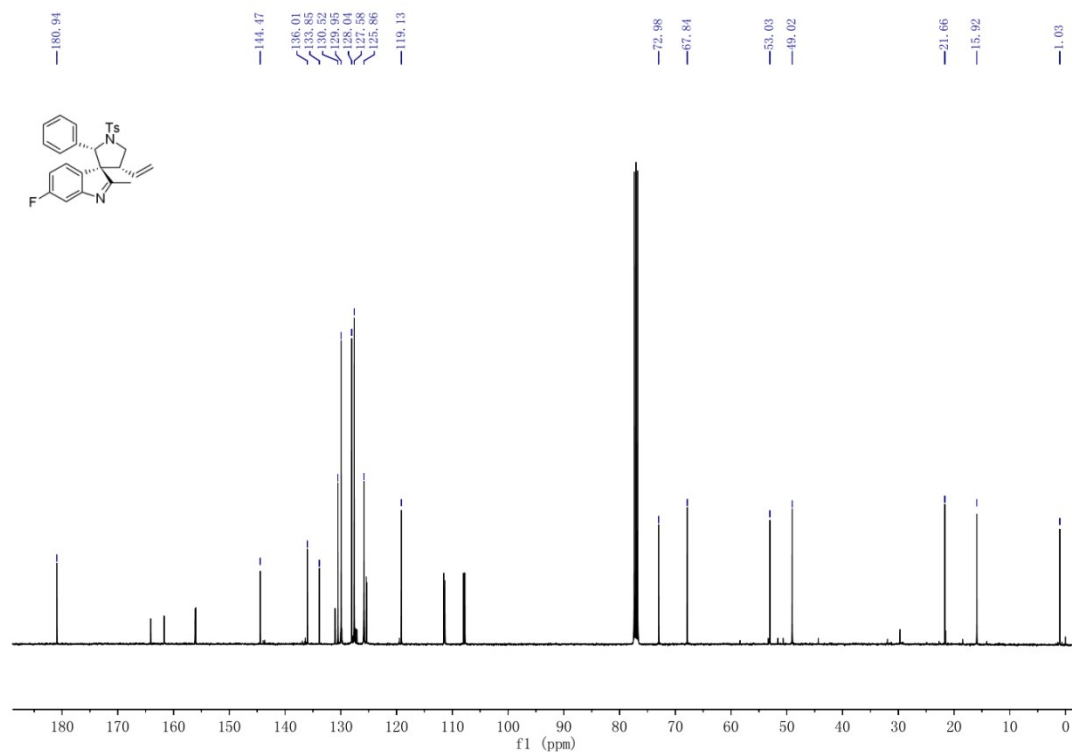

**(2'S,3S,4'R)-2-ethyl-2'-phenyl-1'-tosyl-4'-vinylspiro[indole-3,3'-pyrrolidine] (3x)**

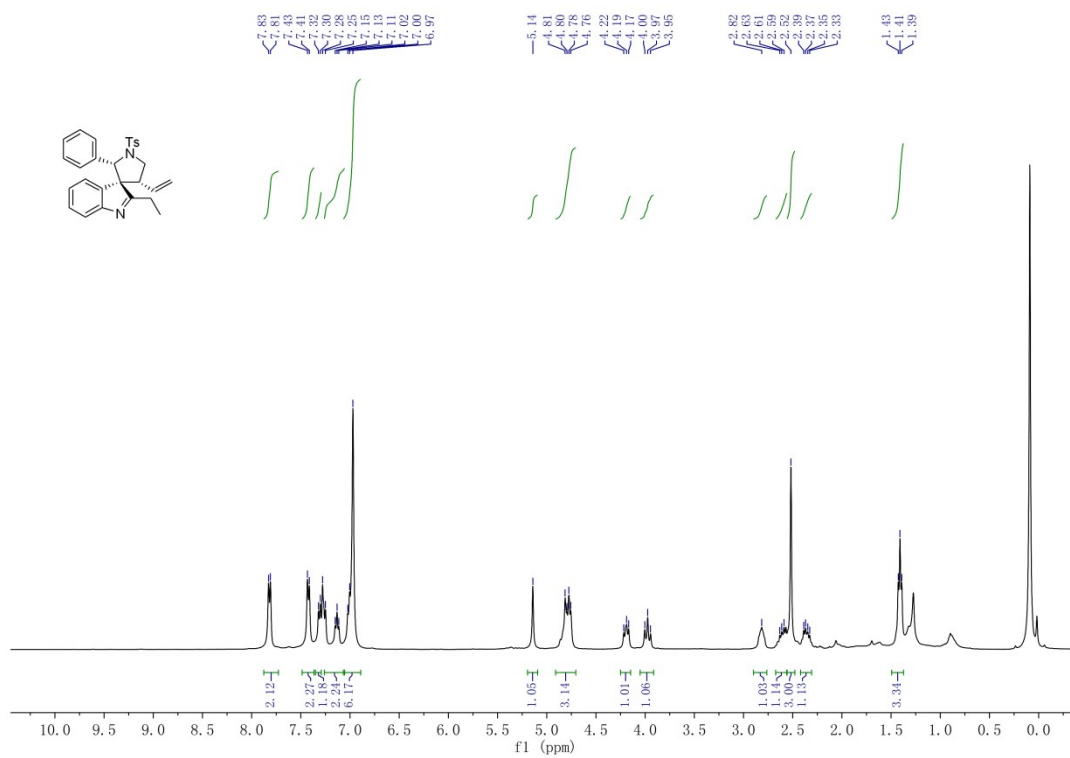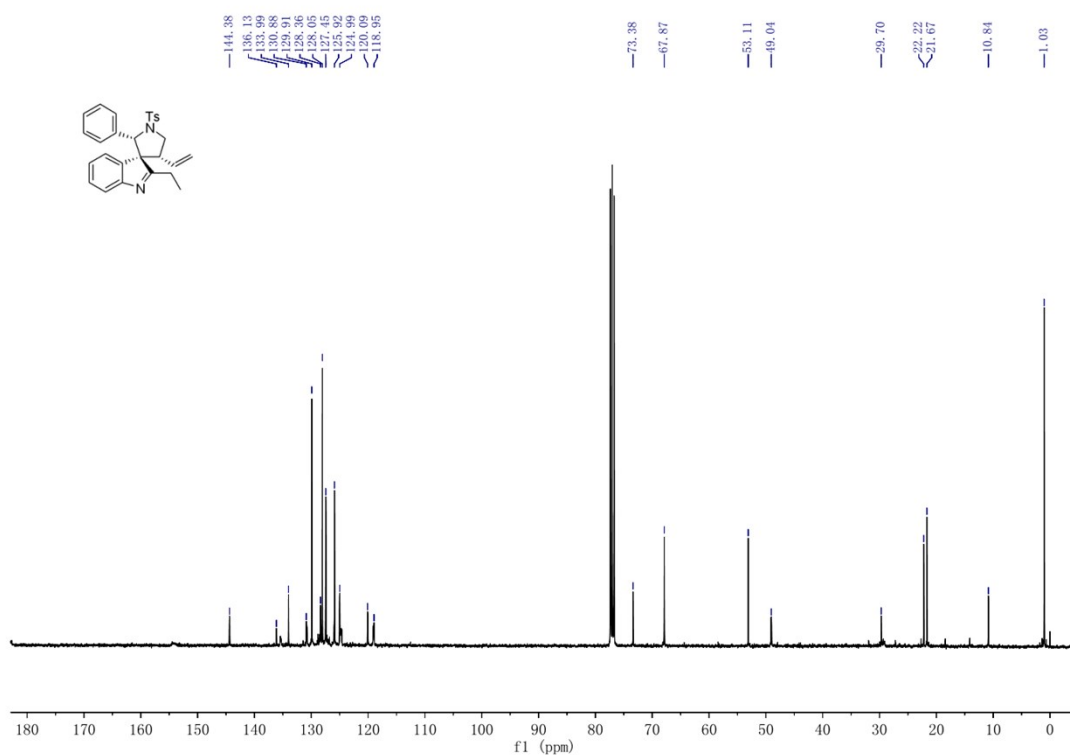

**(2'S,3S,4'R)-2'-phenyl-2-(prop-1-yn-1-yl)-1'-tosyl-4'-vinylspiro[indole-3,3'-pyrrolidine] (3y)**

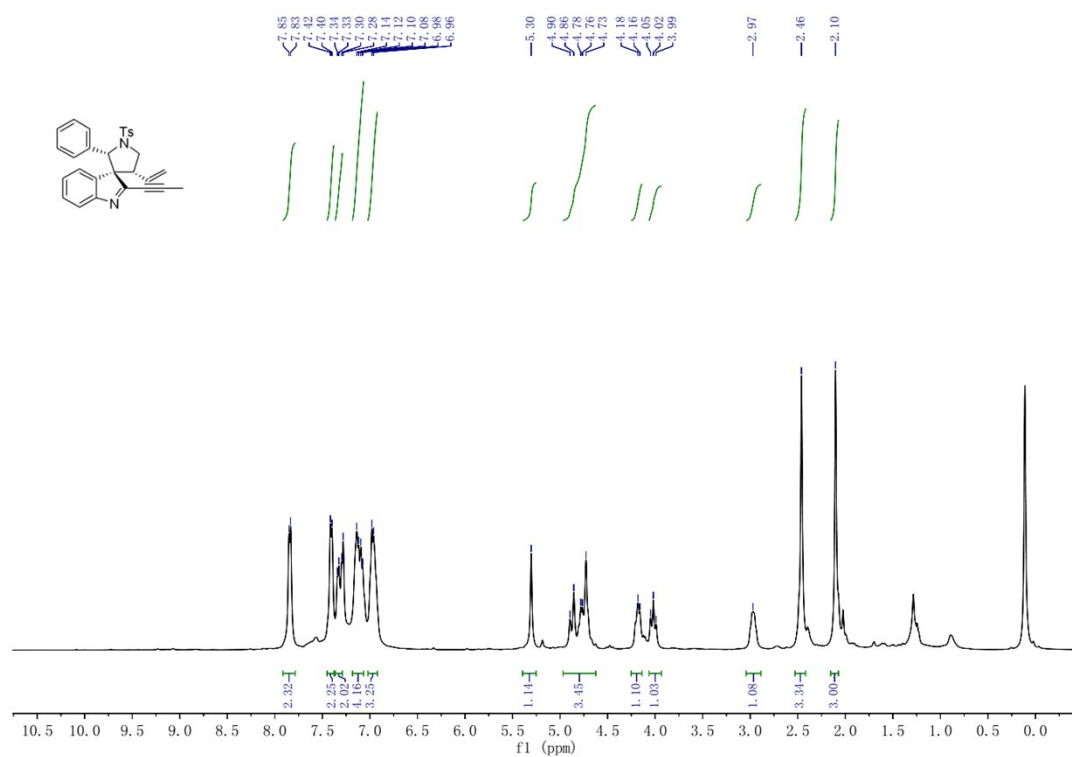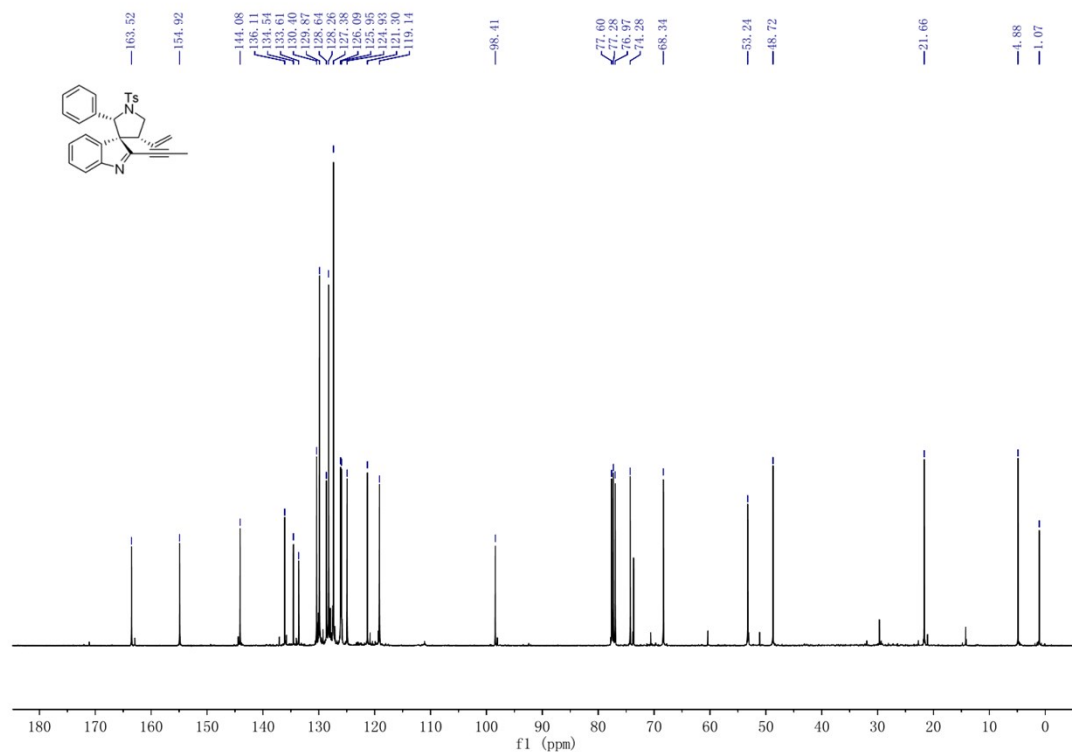

**(2'S,3S,4'R)-2'-phenyl-1'-tosyl-4'-vinylspiro[indole-3,3'-pyrrolidine] (3z)**

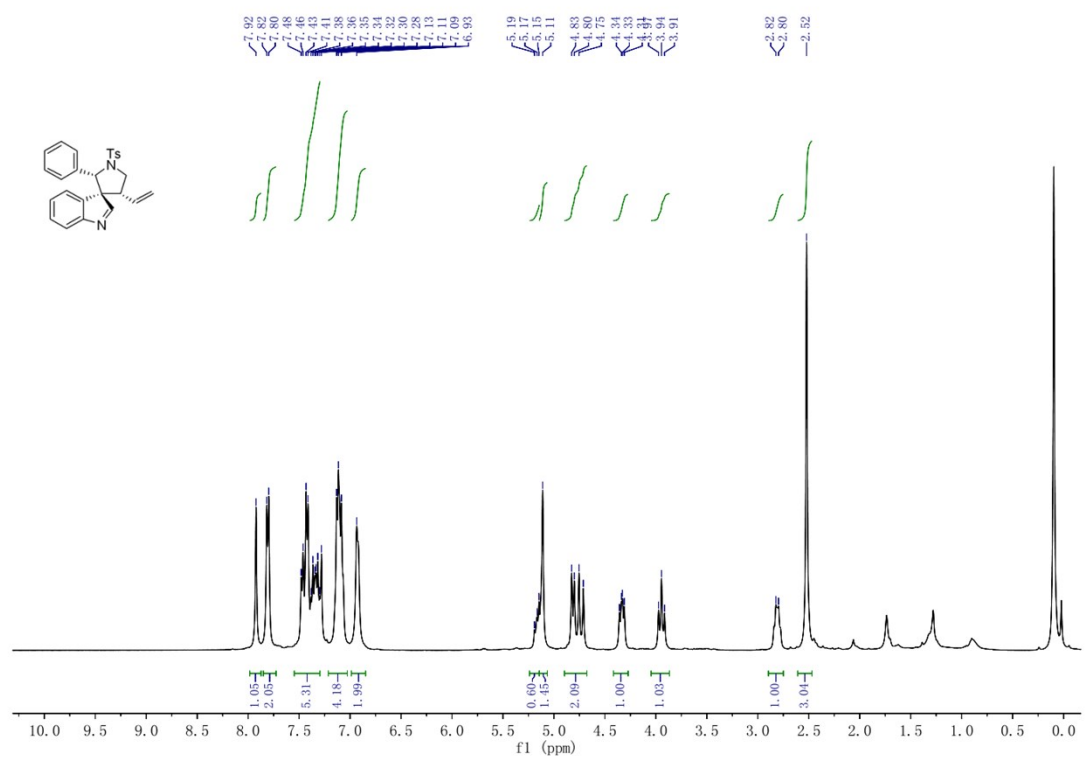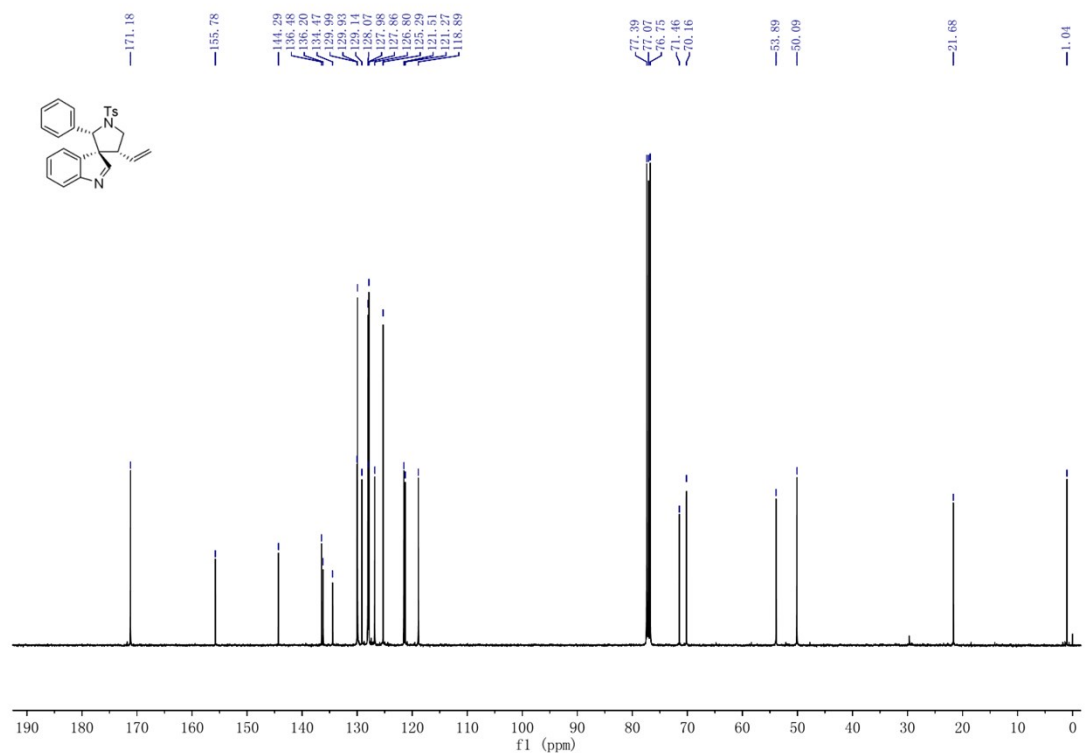

**(1S,4S)-1-phenyl-2-tosyl-4-vinyl-2,3,4,5-tetrahydro-1H-pyrido[4,3-b]indole (5z)**

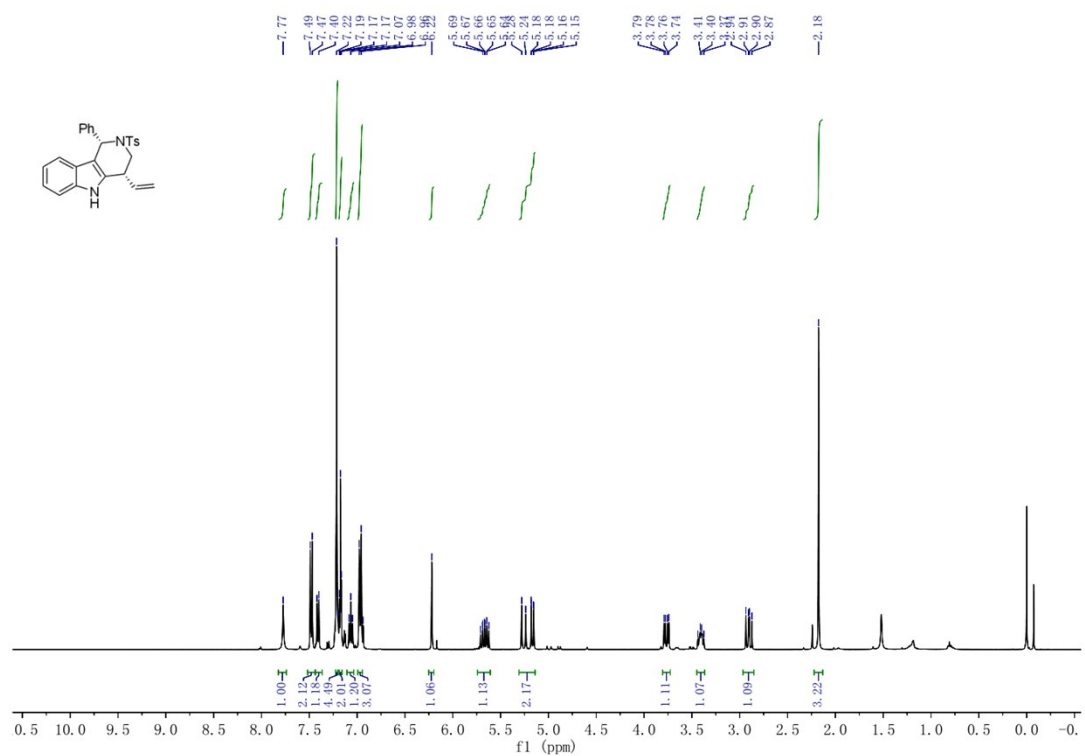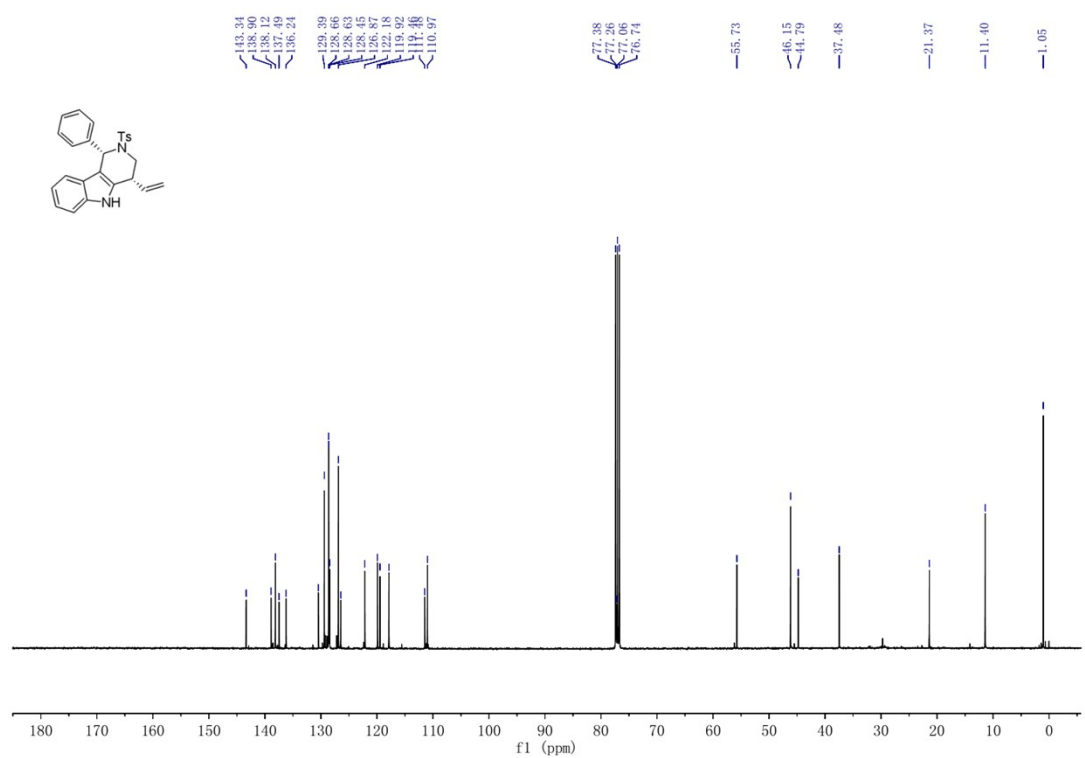



**(2'S,3S,4'R)-2,4'-dimethyl-2'-phenyl-1'-tosyl-4'-vinylspiro[indole-3,3'-pyrrolidine]**  
**(6a)**

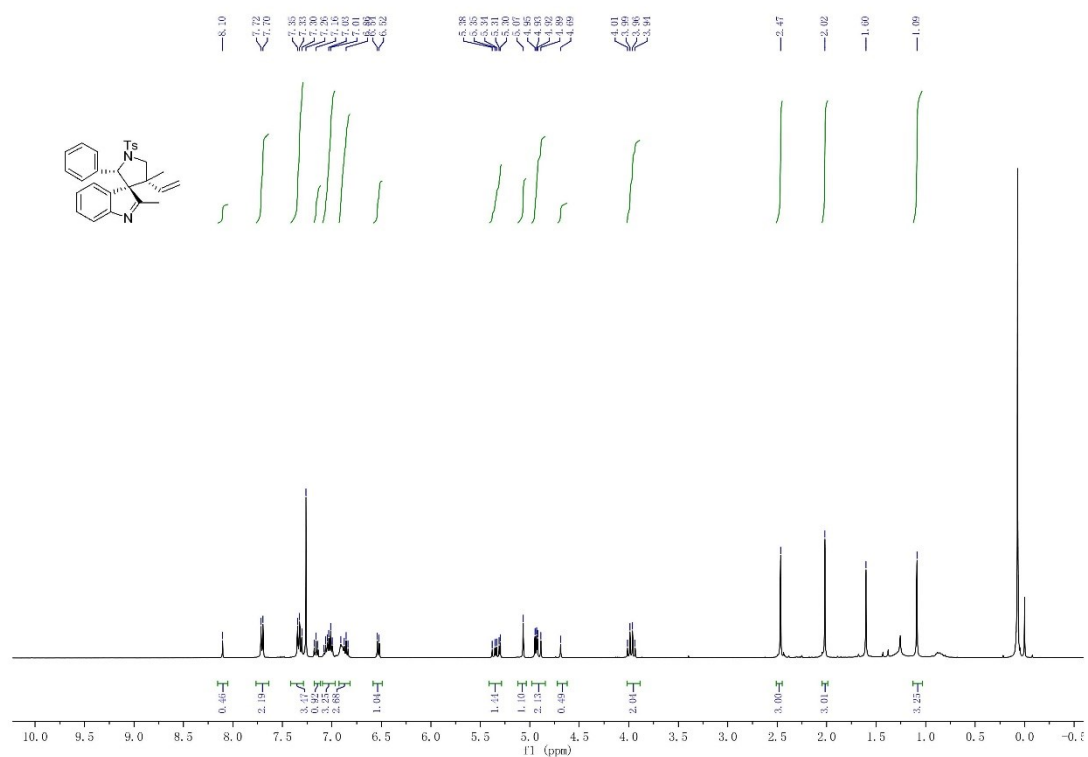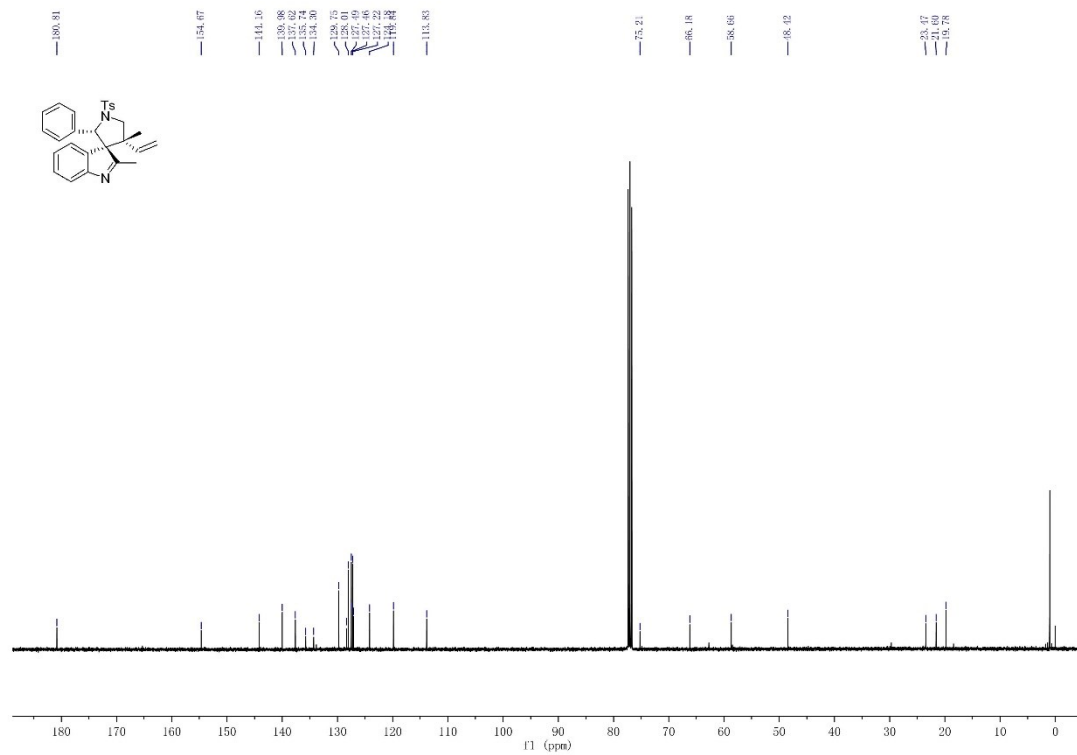

## 6.HPLC spectra of the products

### HPLC of 3a

Conditions: Chiralpak IC column, 20% IPA in hexane,  $v = 1.0$  mL/min,  $\lambda = 254$  nm

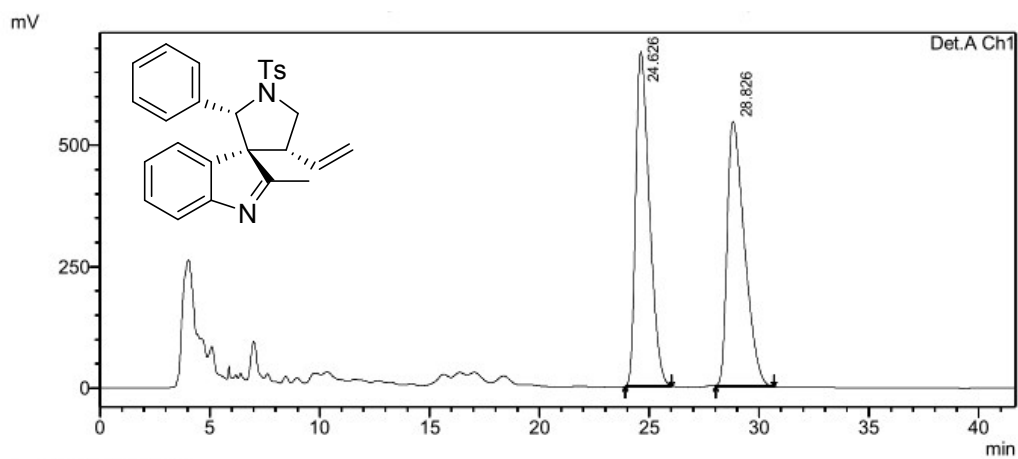

1 Det.A Ch1/254nm

PeakTable

Detector A Ch1 254nm

| Peak# | Ret. Time | Area     | Height  | Area %  |
|-------|-----------|----------|---------|---------|
| 1     | 24.626    | 30114362 | 690088  | 50.206  |
| 2     | 28.826    | 29866777 | 546317  | 49.794  |
| Total |           | 59981139 | 1236405 | 100.000 |

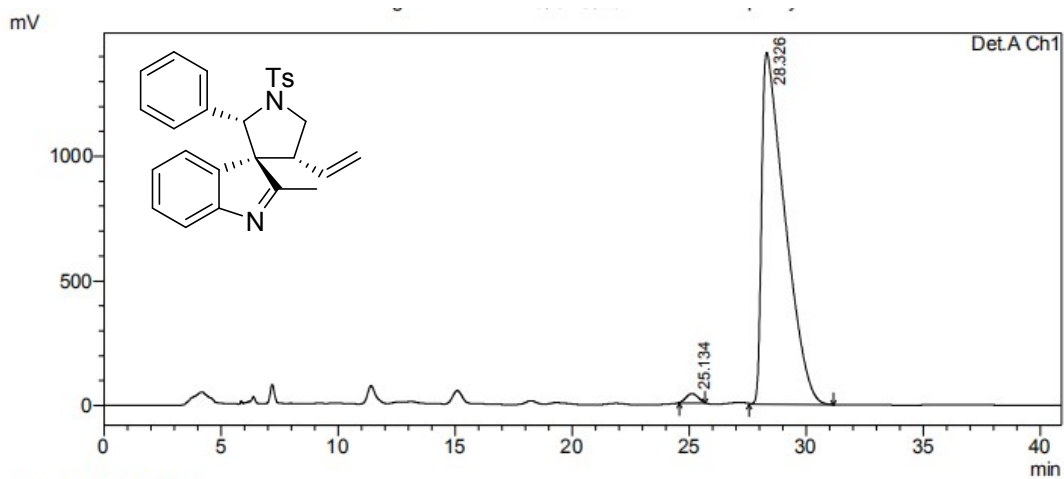

1 Det.A Ch1/254nm

PeakTable

Detector A Ch1 254nm

| Peak# | Ret. Time | Area     | Height  | Area %  |
|-------|-----------|----------|---------|---------|
| 1     | 25.134    | 1421449  | 38584   | 1.437   |
| 2     | 28.326    | 97477769 | 1411768 | 98.563  |
| Total |           | 98899218 | 1450352 | 100.000 |



## HPLC of 3b

Conditions: Chiralpak IC column, 20% IPA in hexane,  $v= 1.0$  mL/min,  $\lambda=210$  nm

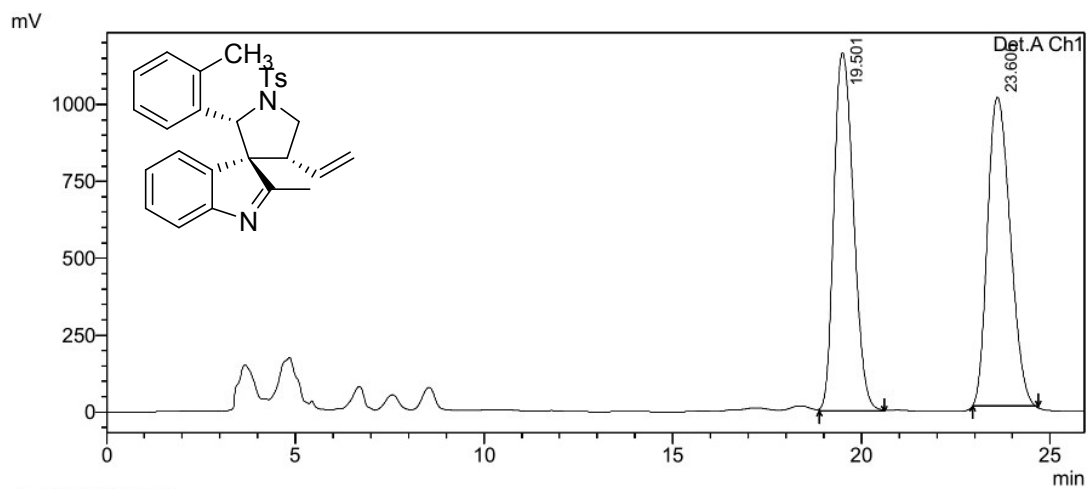

PeakTable

Detector A Ch1 210nm

| Peak# | Ret. Time | Area     | Height  | Area %  |
|-------|-----------|----------|---------|---------|
| 1     | 19.501    | 42109086 | 1164491 | 50.005  |
| 2     | 23.605    | 42099972 | 1004570 | 49.995  |
| Total |           | 84209057 | 2169062 | 100.000 |

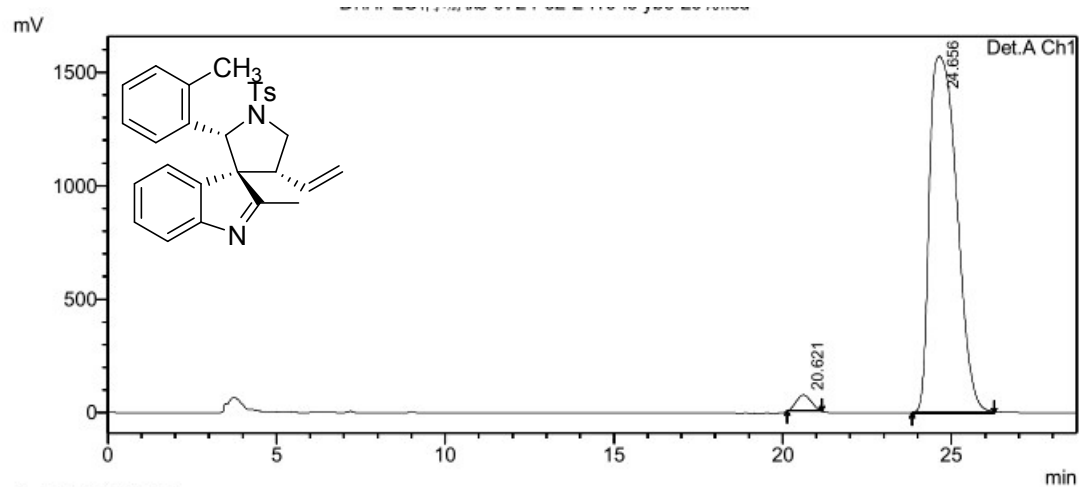

PeakTable

Detector A Ch1 210nm

| Peak# | Ret. Time | Area     | Height  | Area %  |
|-------|-----------|----------|---------|---------|
| 1     | 20.621    | 2101997  | 69713   | 2.319   |
| 2     | 24.656    | 88521663 | 1569456 | 97.681  |
| Total |           | 90623659 | 1639169 | 100.000 |

### HPLC of 3c

Conditions: Chiralpak IC column, 20% IPA in hexane,  $v = 1.0$  mL/min,  $\lambda = 210$  nm

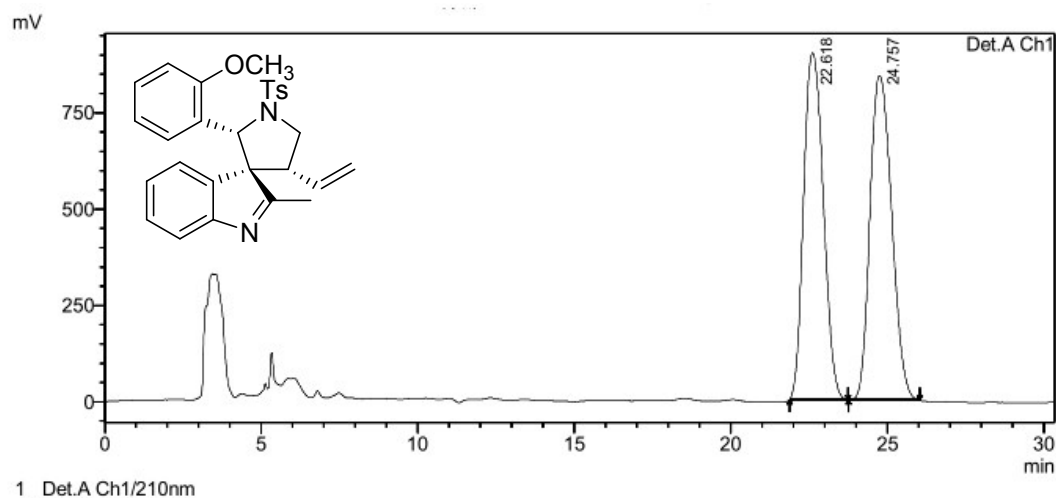

PeakTable

| Peak# | Ret. Time | Area     | Height  | Area %  |
|-------|-----------|----------|---------|---------|
| 1     | 22.618    | 39503821 | 899816  | 49.340  |
| 2     | 24.757    | 40560179 | 841008  | 50.660  |
| Total |           | 80064000 | 1740825 | 100.000 |

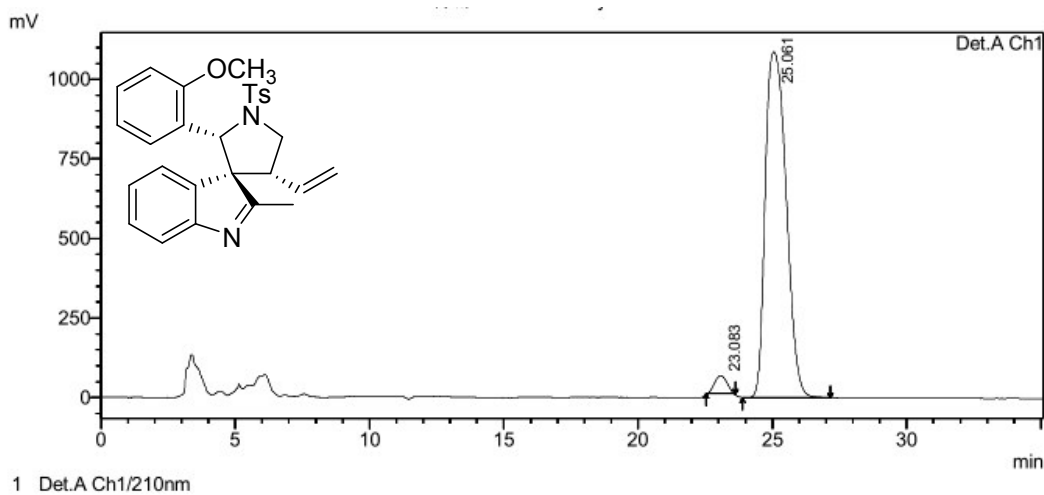

PeakTable

| Peak# | Ret. Time | Area     | Height  | Area %  |
|-------|-----------|----------|---------|---------|
| 1     | 23.083    | 1767715  | 56492   | 2.916   |
| 2     | 25.061    | 58851743 | 1087002 | 97.084  |
| Total |           | 60619457 | 1143493 | 100.000 |

## HPLC of 3d

Conditions: Chiralpak IC column, 20% IPA in hexane,  $v = 1.0 \text{ mL/min}$ ,  $\lambda = 210 \text{ nm}$

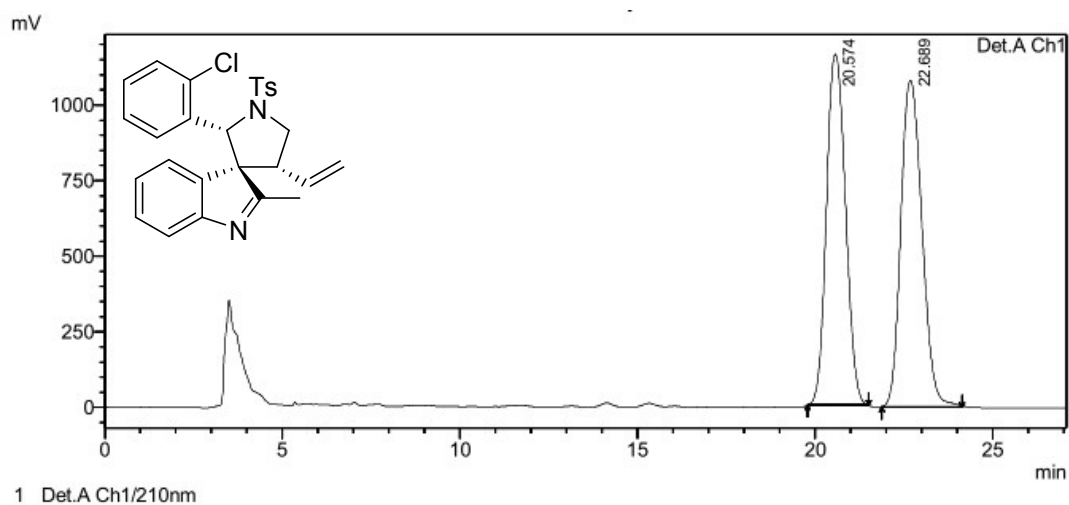

PeakTable

| Detector A Ch1 210nm |           |          |         |         |
|----------------------|-----------|----------|---------|---------|
| Peak#                | Ret. Time | Area     | Height  | Area %  |
| 1                    | 20.574    | 43329262 | 1159719 | 49.168  |
| 2                    | 22.689    | 44796390 | 1080972 | 50.832  |
| Total                |           | 88125651 | 2240691 | 100.000 |

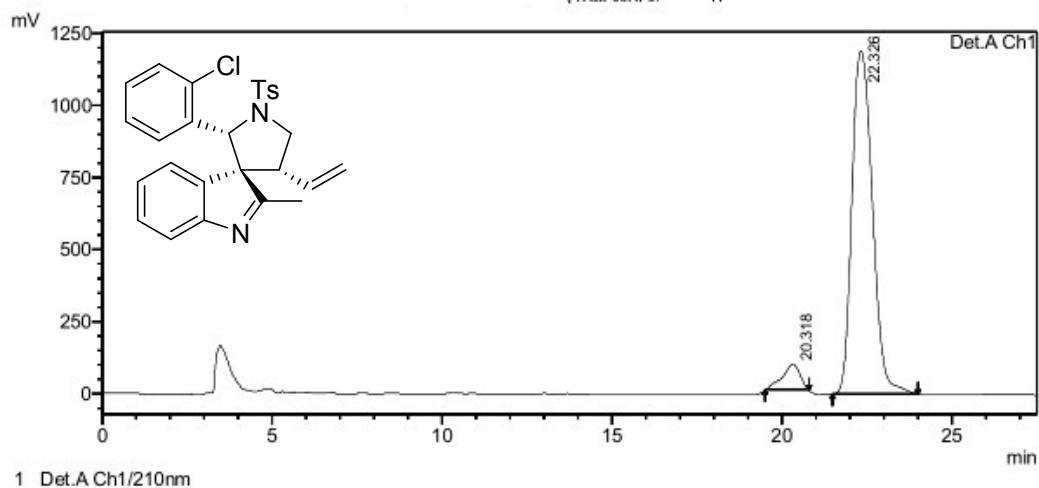

PeakTable

| Detector A Ch1 210nm |           |          |         |         |
|----------------------|-----------|----------|---------|---------|
| Peak#                | Ret. Time | Area     | Height  | Area %  |
| 1                    | 20.318    | 3221992  | 88366   | 6.065   |
| 2                    | 22.326    | 49898614 | 1189319 | 93.935  |
| Total                |           | 53120606 | 1277685 | 100.000 |

## HPLC of 3e

Conditions: Chiralpak IC column, 20% IPA in hexane,  $v = 1.0 \text{ mL/min}$ ,  $\lambda = 210 \text{ nm}$

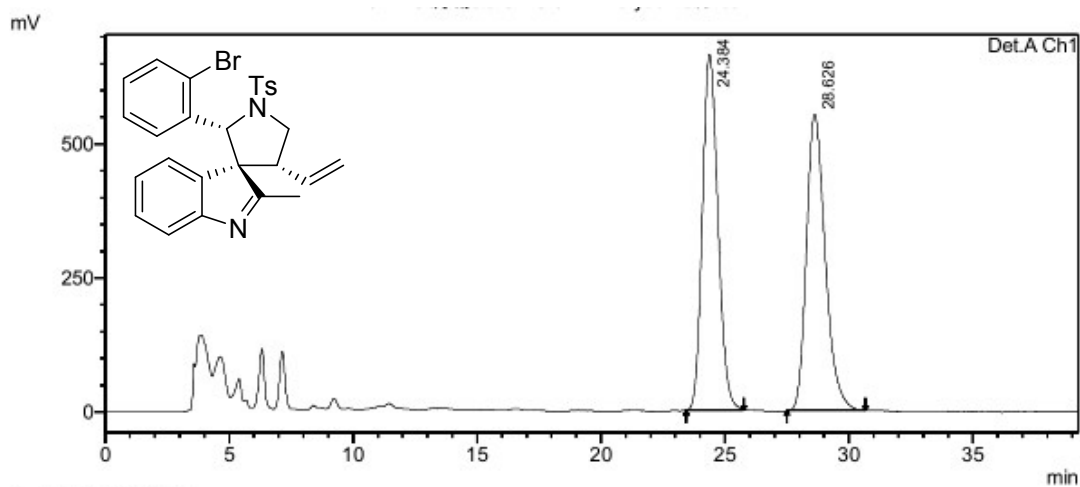

PeakTable

| Peak# | Ret. Time | Area     | Height  | Area %  |
|-------|-----------|----------|---------|---------|
| 1     | 24.384    | 29051191 | 663839  | 49.923  |
| 2     | 28.626    | 29140902 | 552519  | 50.077  |
| Total |           | 58192093 | 1216358 | 100.000 |

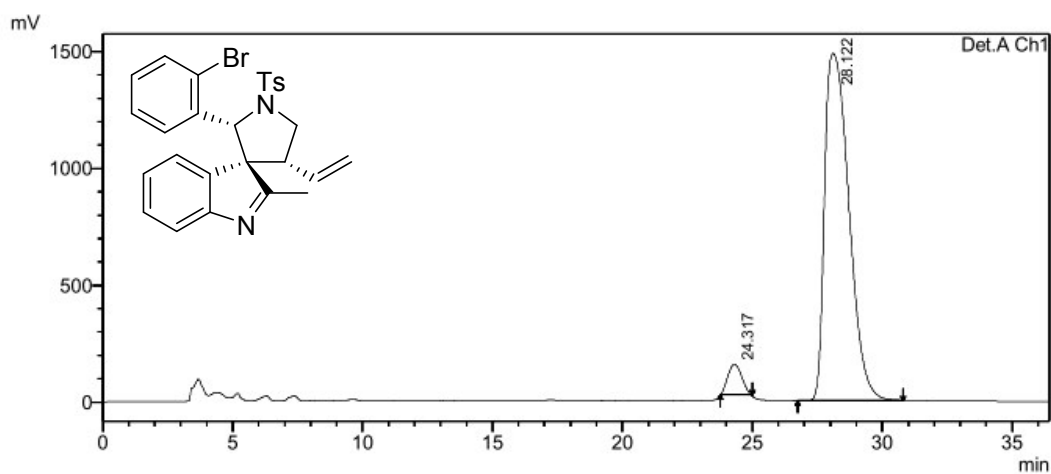

PeakTable

| Peak# | Ret. Time | Area      | Height  | Area %  |
|-------|-----------|-----------|---------|---------|
| 1     | 24.317    | 4688227   | 128789  | 4.624   |
| 2     | 28.122    | 96693321  | 1486342 | 95.376  |
| Total |           | 101381548 | 1615131 | 100.000 |

## HPLC of 3f

Conditions: Chiralpak IC column, 20% IPA in hexane,  $v = 1.0$  mL/min,  $\lambda = 210$  nm

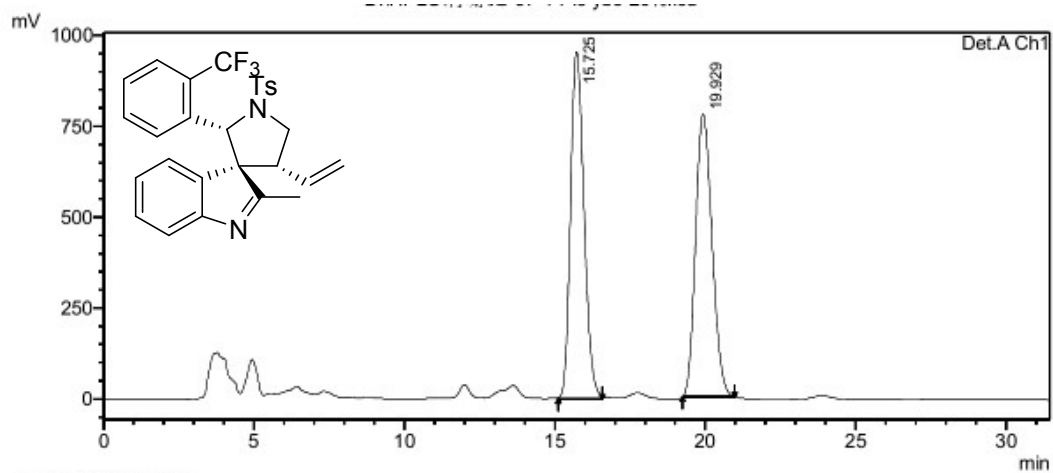

PeakTable

| Peak# | Ret. Time | Area     | Height  | Area %  |
|-------|-----------|----------|---------|---------|
| 1     | 15.725    | 29866506 | 954027  | 50.203  |
| 2     | 19.929    | 29624998 | 777828  | 49.797  |
| Total |           | 59491504 | 1731856 | 100.000 |

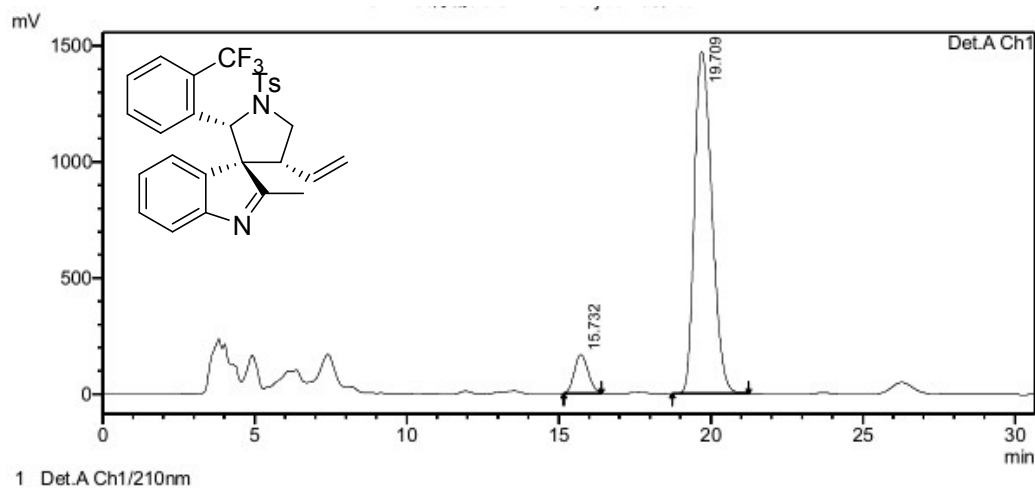

PeakTable

| Peak# | Ret. Time | Area     | Height  | Area %  |
|-------|-----------|----------|---------|---------|
| 1     | 15.732    | 5341977  | 167249  | 8.334   |
| 2     | 19.709    | 58753623 | 1472433 | 91.666  |
| Total |           | 64095600 | 1639682 | 100.000 |

## HPLC of 3g

Conditions: Chiralpak IC column, 20% IPA in hexane,  $v = 1.0$  mL/min,  $\lambda = 210$  nm

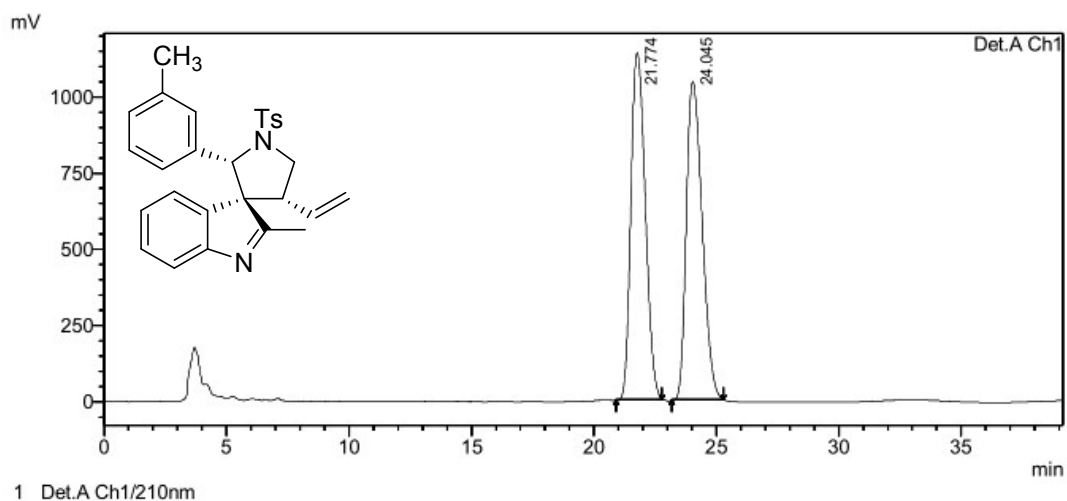

PeakTable

| Peak# | Ret. Time | Area     | Height  | Area %  |
|-------|-----------|----------|---------|---------|
| 1     | 21.774    | 46279659 | 1136345 | 49.562  |
| 2     | 24.045    | 47098272 | 1042700 | 50.438  |
| Total |           | 93377931 | 2179045 | 100.000 |

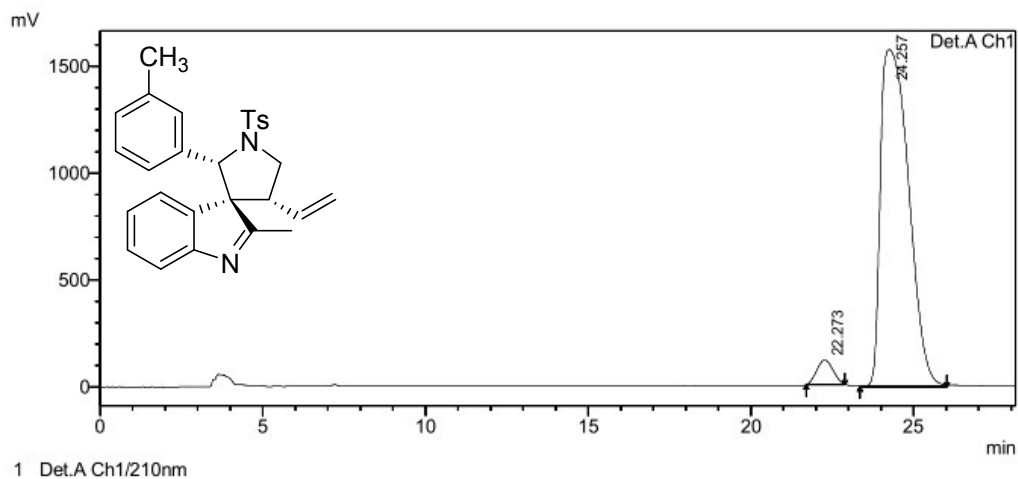

PeakTable

| Peak# | Ret. Time | Area     | Height  | Area %  |
|-------|-----------|----------|---------|---------|
| 1     | 22.273    | 4052899  | 115333  | 4.096   |
| 2     | 24.257    | 94899013 | 1575689 | 95.904  |
| Total |           | 98951912 | 1691022 | 100.000 |

## HPLC of 3h

Conditions: Chiralpak IC column, 20% IPA in hexane,  $v = 1.0 \text{ mL/min}$ ,  $\lambda = 210 \text{ nm}$

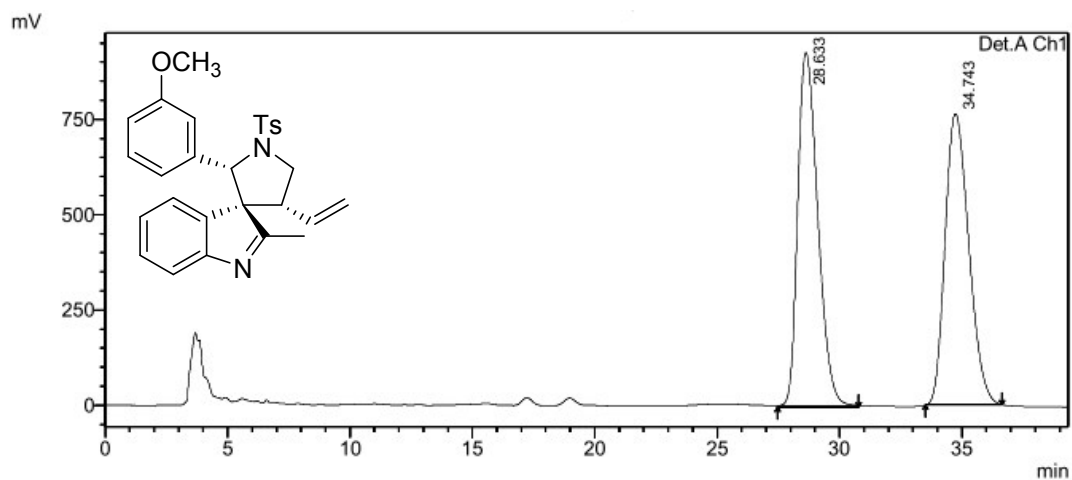

Detector A Ch1 210nm

PeakTable

| Peak# | Ret. Time | Area      | Height  | Area %  |
|-------|-----------|-----------|---------|---------|
| 1     | 28.633    | 52943986  | 928305  | 50.710  |
| 2     | 34.743    | 51461503  | 763822  | 49.290  |
| Total |           | 104405489 | 1692127 | 100.000 |

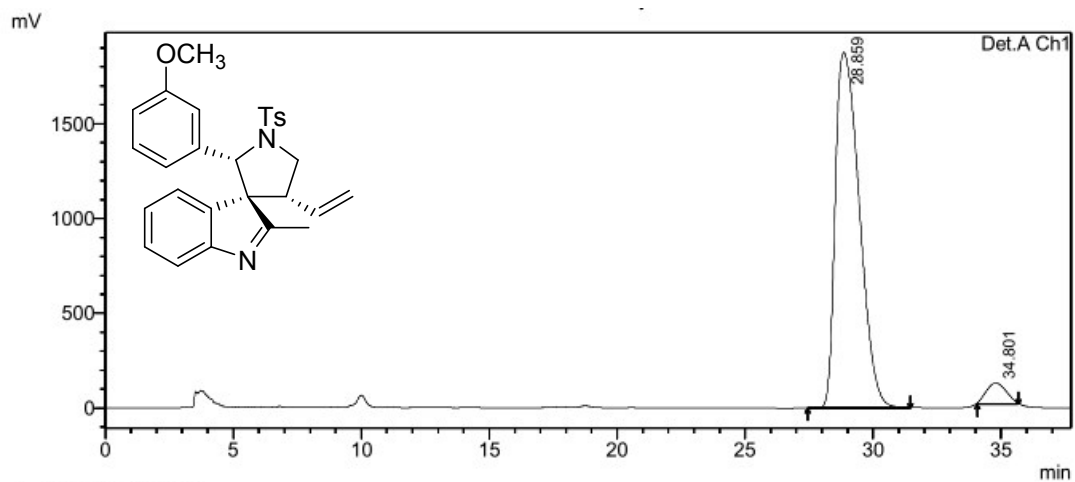

Detector A Ch1 210nm

PeakTable

| Peak# | Ret. Time | Area      | Height  | Area %  |
|-------|-----------|-----------|---------|---------|
| 1     | 28.859    | 122436390 | 1874729 | 95.270  |
| 2     | 34.801    | 6078593   | 110584  | 4.730   |
| Total |           | 128514983 | 1985312 | 100.000 |

## HPLC of 3i

Conditions: Chiralpak IC column, 20% IPA in hexane,  $v = 1.0 \text{ mL/min}$ ,  $\lambda = 210 \text{ nm}$

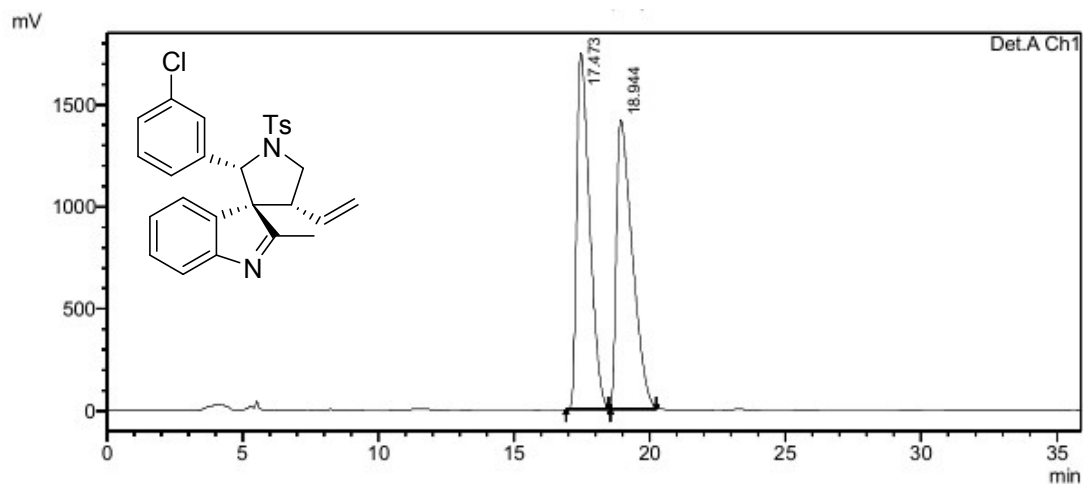

1 Det.A Ch1/254nm

PeakTable

| Peak# | Ret. Time | Area      | Height  | Area %  |
|-------|-----------|-----------|---------|---------|
| 1     | 17.473    | 57894113  | 1745569 | 49.864  |
| 2     | 18.944    | 58210135  | 1417944 | 50.136  |
| Total |           | 116104248 | 3163514 | 100.000 |

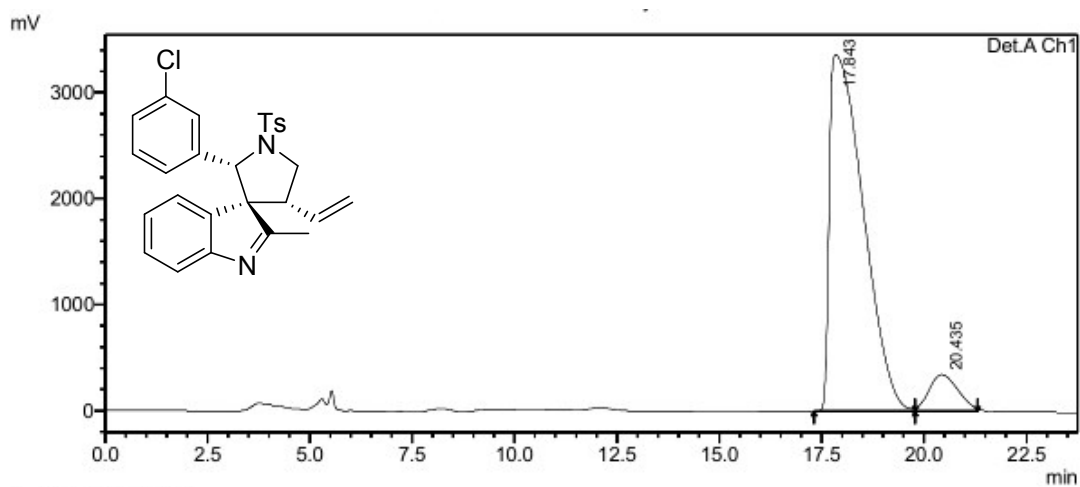

1 Det.A Ch1/254nm

PeakTable

| Peak# | Ret. Time | Area      | Height  | Area %  |
|-------|-----------|-----------|---------|---------|
| 1     | 17.843    | 193159229 | 3363115 | 91.911  |
| 2     | 20.435    | 16999578  | 343964  | 8.089   |
| Total |           | 210158808 | 3707079 | 100.000 |



## HPLC of 3j

Conditions: Chiralpak IC column, 20% IPA in hexane,  $v = 1.0$  mL/min,  $\lambda = 210$  nm

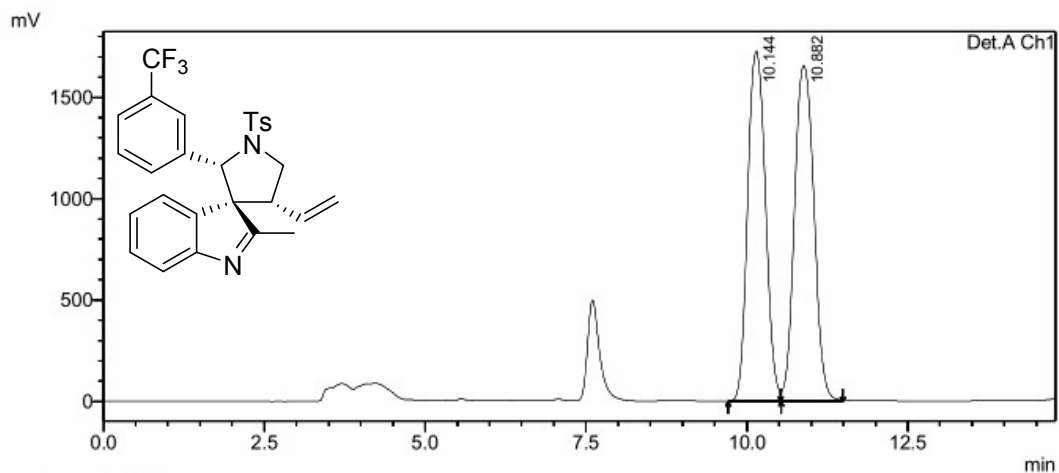

PeakTable

| Detector A Ch1 210nm |           |          |         |         |
|----------------------|-----------|----------|---------|---------|
| Peak#                | Ret. Time | Area     | Height  | Area %  |
| 1                    | 10.144    | 33701022 | 1726893 | 49.181  |
| 2                    | 10.882    | 34822908 | 1656056 | 50.819  |
| Total                |           | 68523930 | 3382949 | 100.000 |

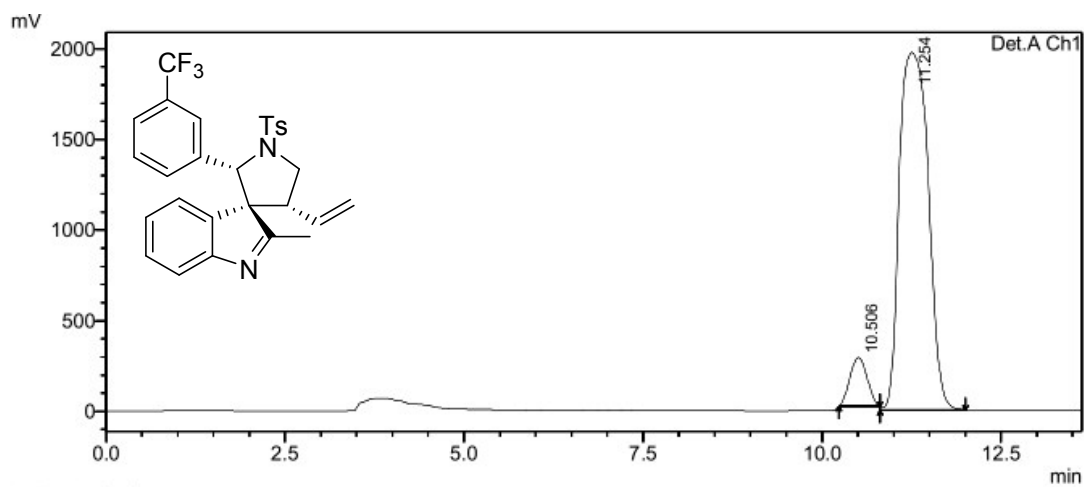

PeakTable

| Detector A Ch1 210nm |           |          |         |         |
|----------------------|-----------|----------|---------|---------|
| Peak#                | Ret. Time | Area     | Height  | Area %  |
| 1                    | 10.506    | 4474785  | 268360  | 7.465   |
| 2                    | 11.254    | 55464987 | 1973795 | 92.535  |
| Total                |           | 59939772 | 2242155 | 100.000 |

## HPLC of **3k**

Conditions: Chiralpak IC column, 20% IPA in hexane,  $v = 1.0$  mL/min,  $\lambda = 210$  nm

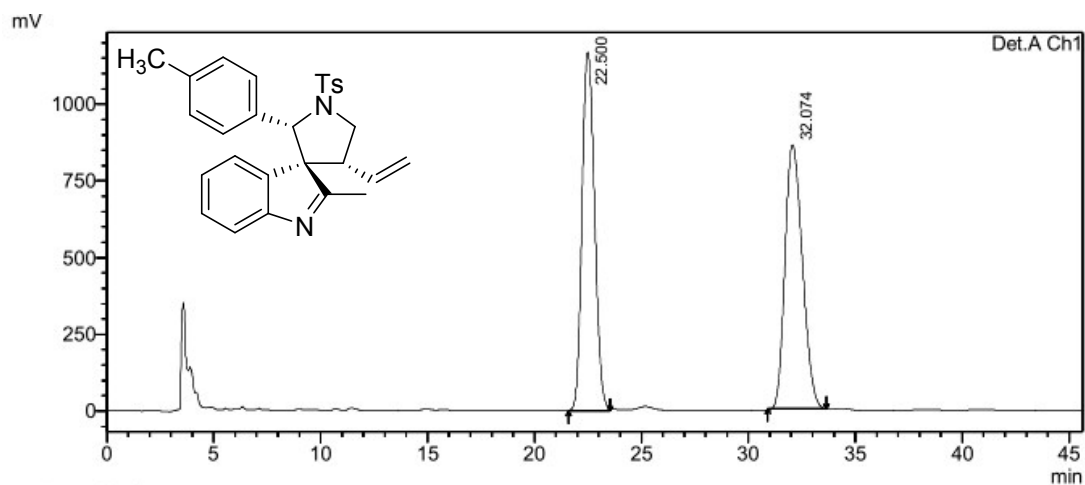

PeakTable

Detector A Ch1 210nm

| Peak# | Ret. Time | Area     | Height  | Area %  |
|-------|-----------|----------|---------|---------|
| 1     | 22.500    | 47660930 | 1167703 | 49.446  |
| 2     | 32.074    | 48728182 | 860740  | 50.554  |
| Total |           | 96389112 | 2028443 | 100.000 |

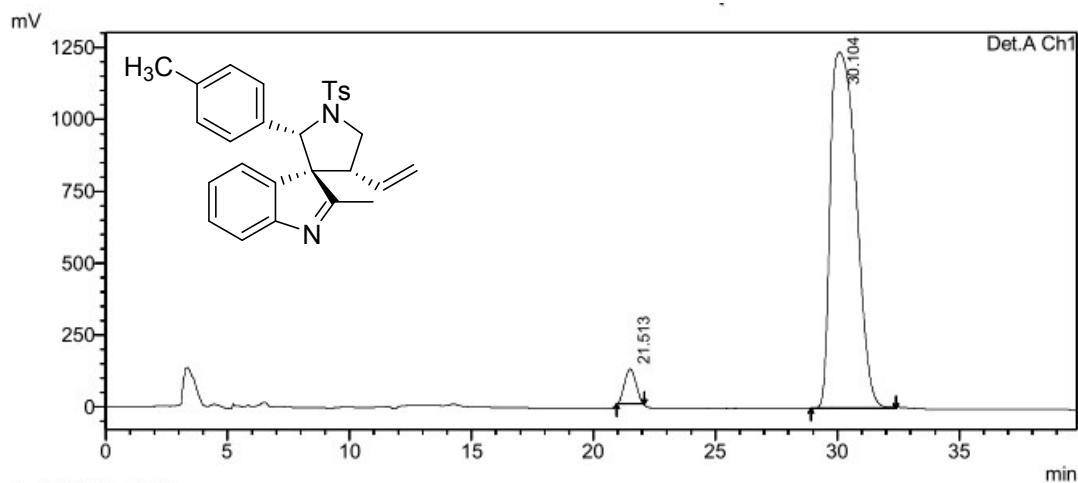

PeakTable

Detector A Ch1 210nm

| Peak# | Ret. Time | Area     | Height  | Area %  |
|-------|-----------|----------|---------|---------|
| 1     | 21.513    | 3932058  | 121540  | 4.142   |
| 2     | 30.104    | 90991659 | 1237564 | 95.858  |
| Total |           | 94923717 | 1359104 | 100.000 |

## HPLC of 31

Conditions: Chiralpak IC column, 20% IPA in hexane,  $v = 1.0 \text{ mL/min}$ ,  $\lambda = 210 \text{ nm}$

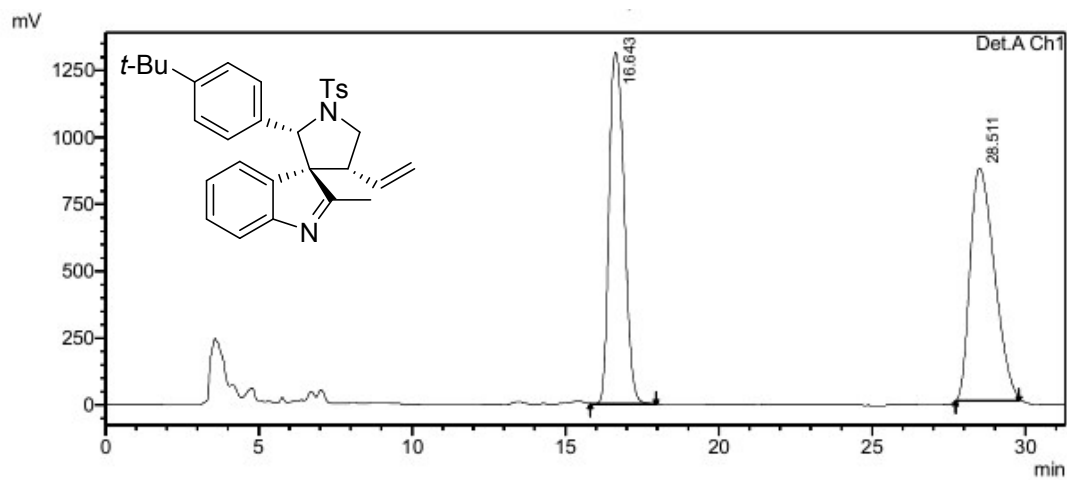

PeakTable

| Peak# | Ret. Time | Area     | Height  | Area %  |
|-------|-----------|----------|---------|---------|
| 1     | 16.643    | 44874381 | 1313744 | 48.226  |
| 2     | 28.511    | 48175728 | 869743  | 51.774  |
| Total |           | 93050109 | 2183488 | 100.000 |

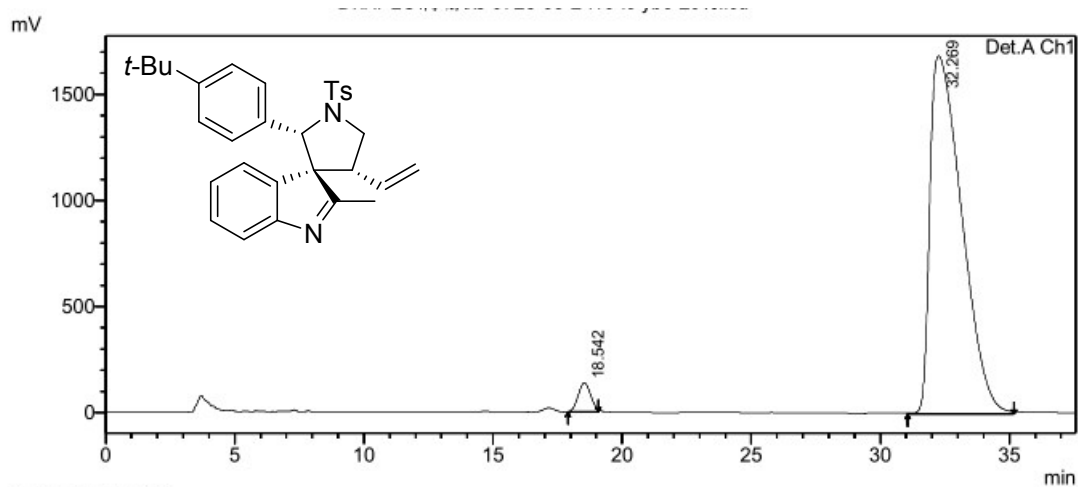

PeakTable

| Peak# | Ret. Time | Area      | Height  | Area %  |
|-------|-----------|-----------|---------|---------|
| 1     | 18.542    | 4626809   | 136714  | 3.100   |
| 2     | 32.269    | 144604180 | 1687510 | 96.900  |
| Total |           | 149230989 | 1824223 | 100.000 |

### HPLC of 3m

Conditions: Chiralpak IC column, 20% IPA in hexane,  $v = 1.0 \text{ mL/min}$ ,  $\lambda = 210 \text{ nm}$

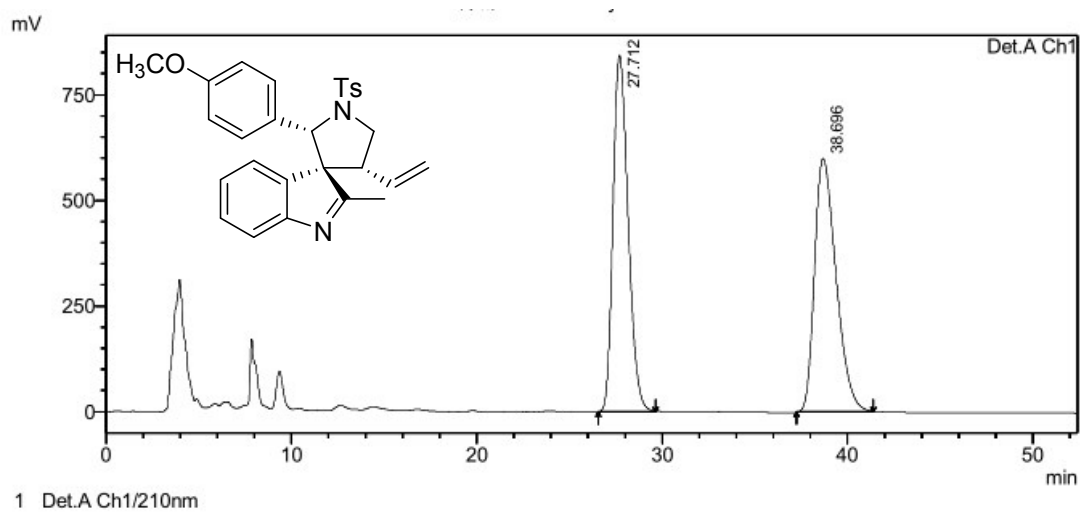

PeakTable

| Detector A Ch1 210nm |           |          |         |         |
|----------------------|-----------|----------|---------|---------|
| Peak#                | Ret. Time | Area     | Height  | Area %  |
| 1                    | 27.712    | 47925058 | 843967  | 49.735  |
| 2                    | 38.696    | 48436010 | 599801  | 50.265  |
| Total                |           | 96361068 | 1443768 | 100.000 |

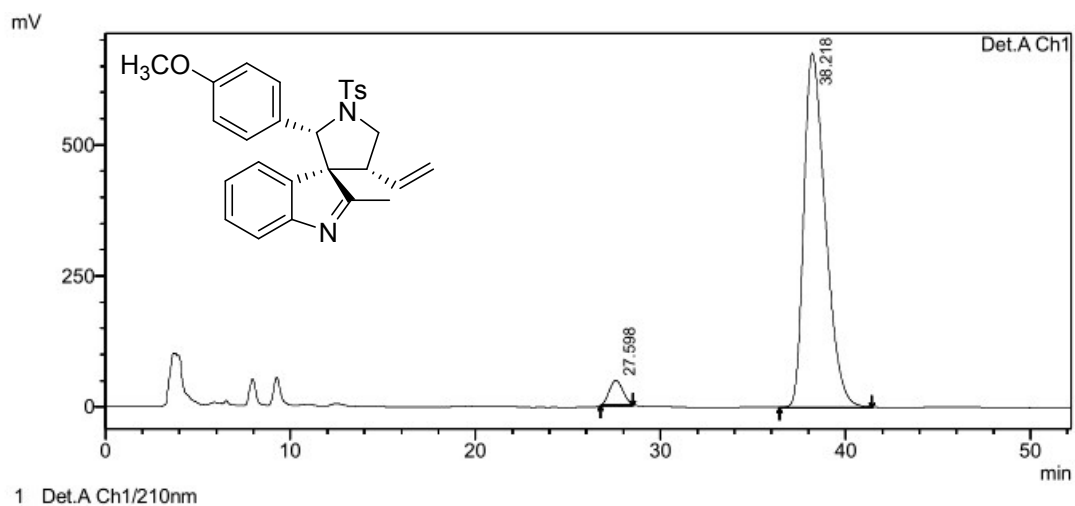

PeakTable

| Detector A Ch1 210nm |           |          |        |         |
|----------------------|-----------|----------|--------|---------|
| Peak#                | Ret. Time | Area     | Height | Area %  |
| 1                    | 27.598    | 2515143  | 48042  | 4.383   |
| 2                    | 38.218    | 54875351 | 676008 | 95.617  |
| Total                |           | 57390494 | 724050 | 100.000 |

## HPLC of 3n

Conditions: Chiralpak IC column, 20% IPA in hexane,  $v = 1.0$  mL/min,  $\lambda = 210$  nm

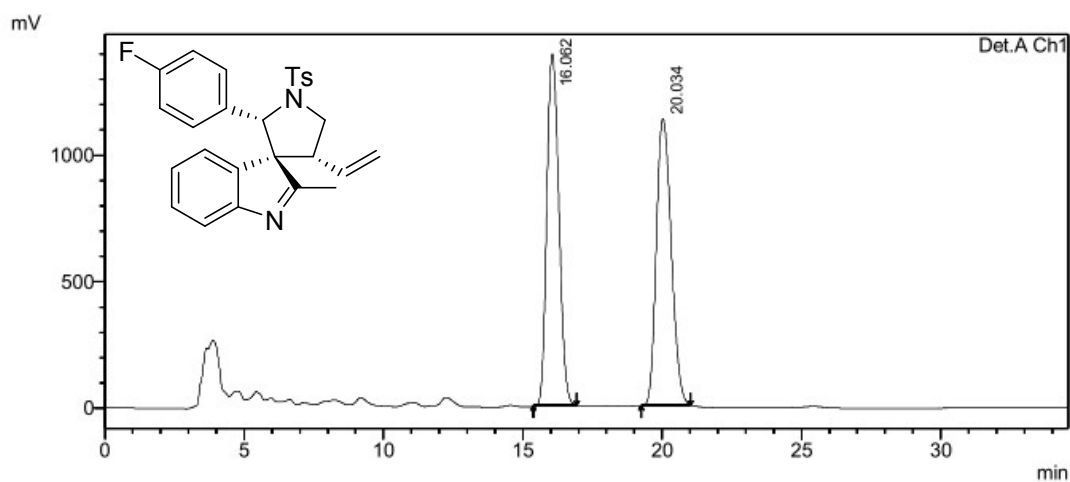

1 Det.A Ch1/210nm

PeakTable

Detector A Ch1 210nm

| Peak# | Ret. Time | Area     | Height  | Area %  |
|-------|-----------|----------|---------|---------|
| 1     | 16.062    | 41871064 | 1388181 | 49.764  |
| 2     | 20.034    | 42267688 | 1133925 | 50.236  |
| Total |           | 84138753 | 2522106 | 100.000 |

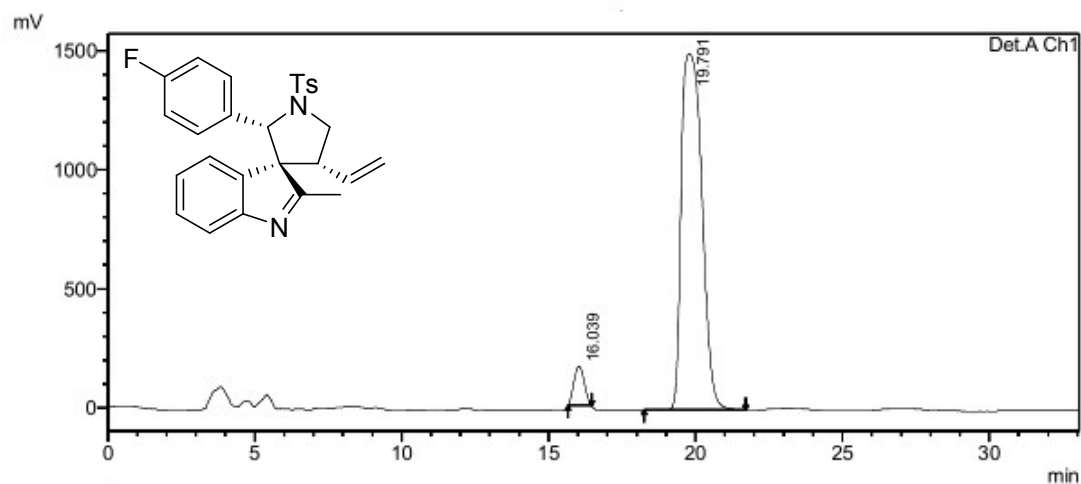

1 Det.A Ch1/210nm

PeakTable

Detector A Ch1 210nm

| Peak# | Ret. Time | Area     | Height  | Area %  |
|-------|-----------|----------|---------|---------|
| 1     | 16.039    | 4059218  | 164953  | 5.285   |
| 2     | 19.791    | 72746743 | 1495632 | 94.715  |
| Total |           | 76805960 | 1660584 | 100.000 |

### HPLC of 3o

Conditions: Chiralpak IC column, 20% IPA in hexane,  $v = 1.0 \text{ mL/min}$ ,  $\lambda = 210 \text{ nm}$

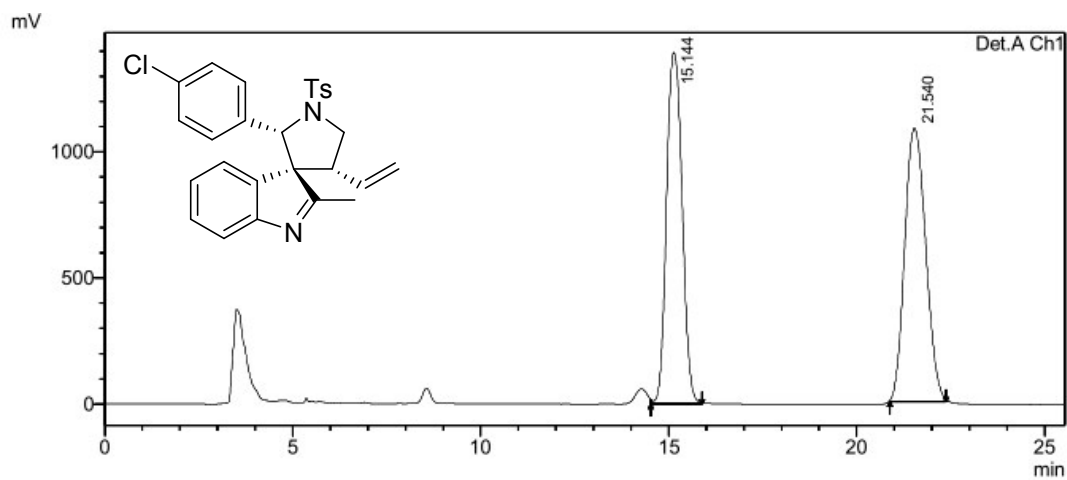

PeakTable

| Peak# | Ret. Time | Area     | Height  | Area %  |
|-------|-----------|----------|---------|---------|
| 1     | 15.144    | 40182968 | 1393065 | 48.850  |
| 2     | 21.540    | 42074441 | 1084914 | 51.150  |
| Total |           | 82257409 | 2477979 | 100.000 |

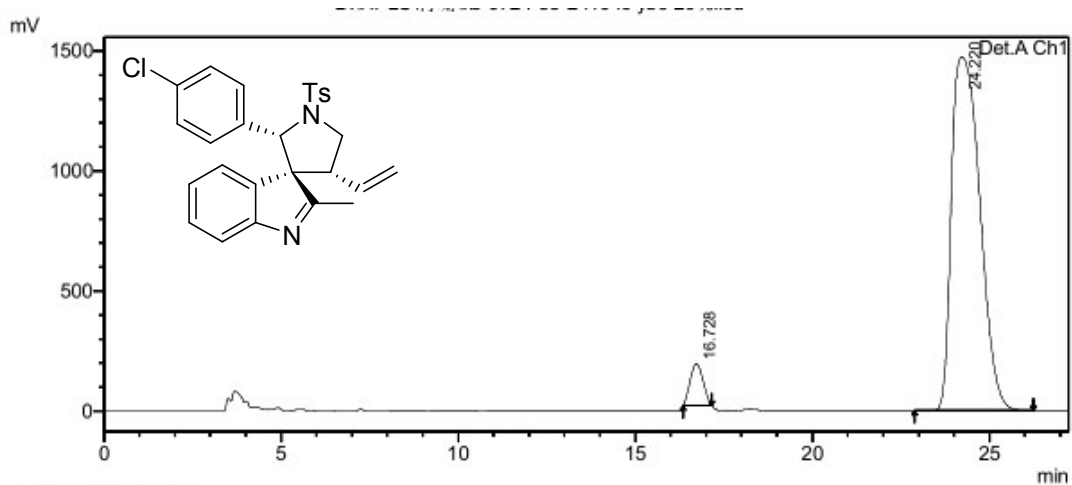

PeakTable

| Peak# | Ret. Time | Area     | Height  | Area %  |
|-------|-----------|----------|---------|---------|
| 1     | 16.728    | 4358554  | 172753  | 5.053   |
| 2     | 24.220    | 81891385 | 1472099 | 94.947  |
| Total |           | 86249939 | 1644852 | 100.000 |

## HPLC of 3p

Conditions: Chiralpak IC column, 20% IPA in hexane,  $v = 1.0$  mL/min,  $\lambda = 210$  nm

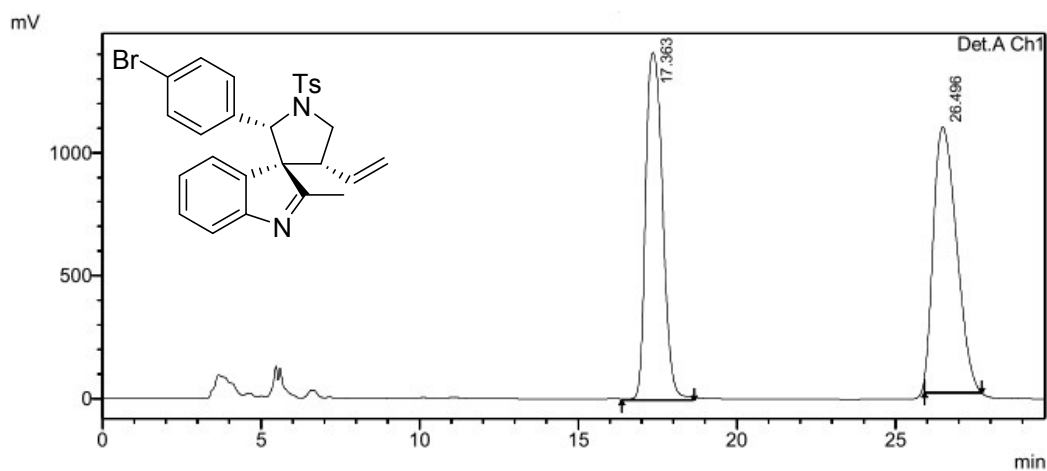

PeakTable

| Peak# | Ret. Time | Area      | Height  | Area %  |
|-------|-----------|-----------|---------|---------|
| 1     | 17.363    | 52582396  | 1411394 | 48.926  |
| 2     | 26.496    | 54890945  | 1079982 | 51.074  |
| Total |           | 107473342 | 2491376 | 100.000 |

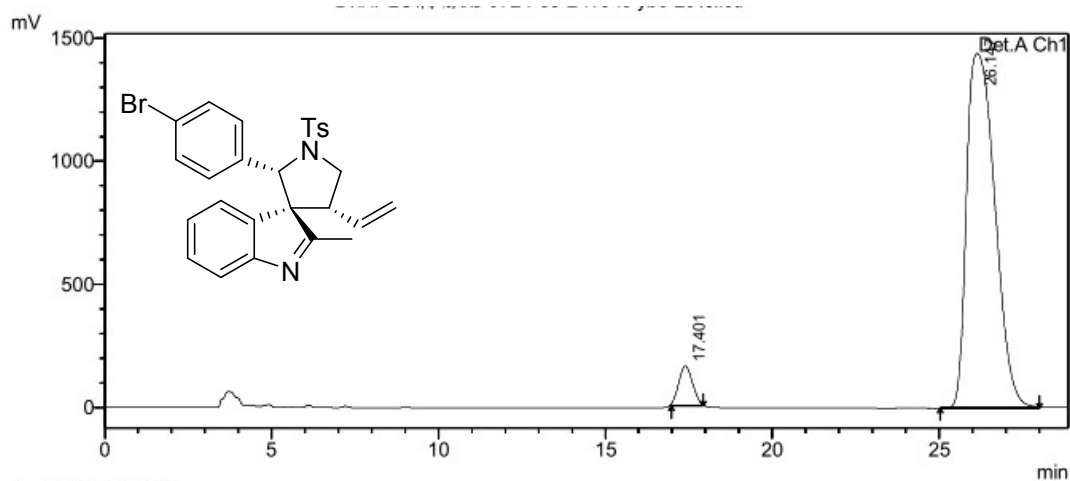

PeakTable

| Peak# | Ret. Time | Area     | Height  | Area %  |
|-------|-----------|----------|---------|---------|
| 1     | 17.401    | 4685534  | 161695  | 5.235   |
| 2     | 26.147    | 84812495 | 1438174 | 94.765  |
| Total |           | 89498029 | 1599868 | 100.000 |

## HPLC of 3q

Conditions: Chiralpak IC column, 20% IPA in hexane,  $v = 1.0 \text{ mL/min}$ ,  $\lambda = 210 \text{ nm}$

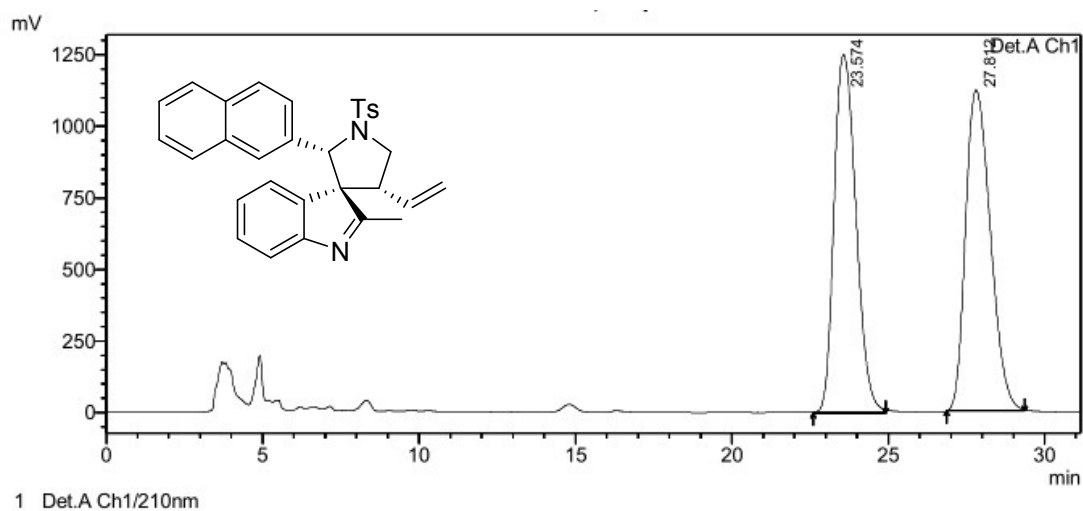

PeakTable

| Peak# | Ret. Time | Area      | Height  | Area %  |
|-------|-----------|-----------|---------|---------|
| 1     | 23.574    | 60955246  | 1250453 | 49.569  |
| 2     | 27.812    | 62014536  | 1120293 | 50.431  |
| Total |           | 122969781 | 2370746 | 100.000 |

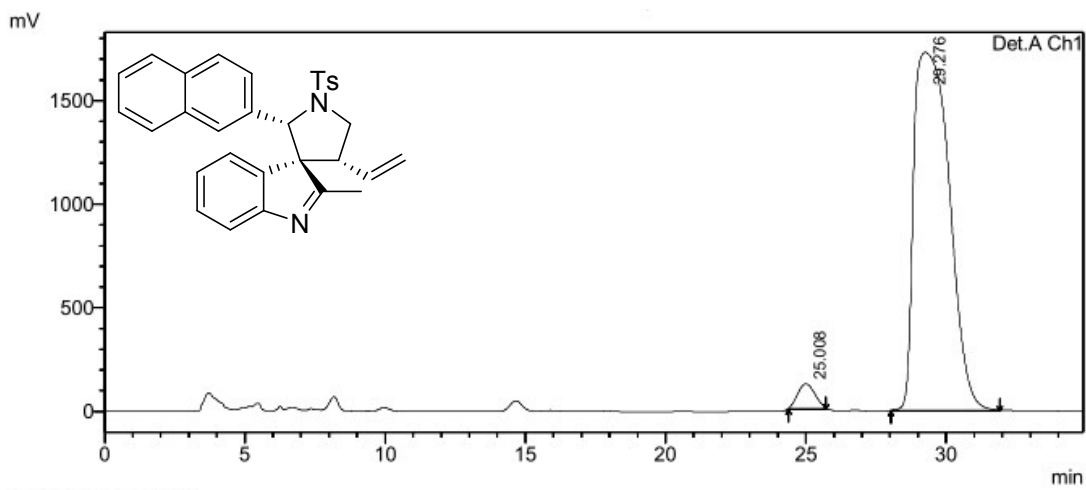

PeakTable

| Peak# | Ret. Time | Area      | Height  | Area %  |
|-------|-----------|-----------|---------|---------|
| 1     | 25.008    | 5212845   | 120724  | 3.300   |
| 2     | 29.276    | 152740582 | 1730435 | 96.700  |
| Total |           | 157953427 | 1851159 | 100.000 |



## HPLC of 3r

Conditions: Chiralpak IC column, 20% IPA in hexane,  $v = 1.0$  mL/min,  $\lambda = 210$  nm

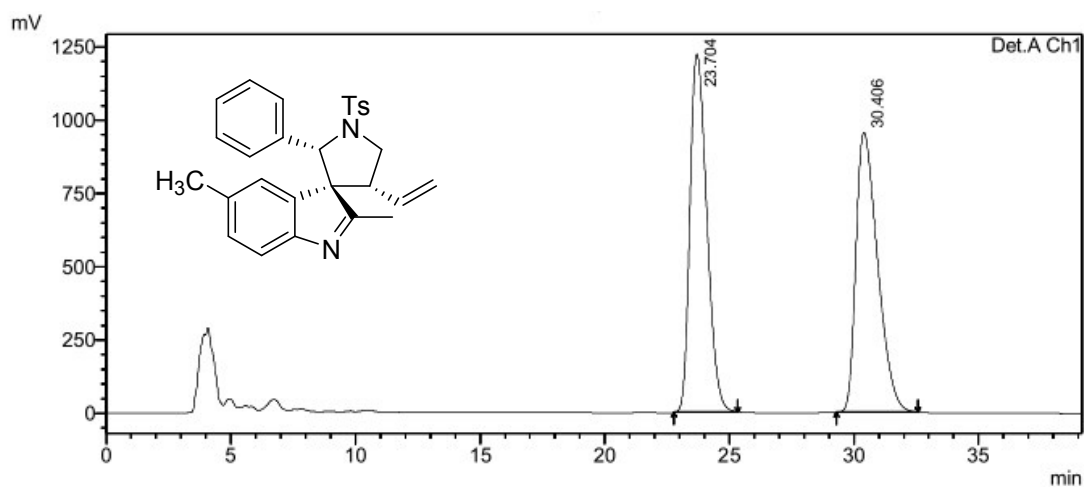

Detector A Ch1 210nm

PeakTable

| Peak# | Ret. Time | Area      | Height  | Area %  |
|-------|-----------|-----------|---------|---------|
| 1     | 23.704    | 57563105  | 1220713 | 49.913  |
| 2     | 30.406    | 57764171  | 953895  | 50.087  |
| Total |           | 115327276 | 2174608 | 100.000 |

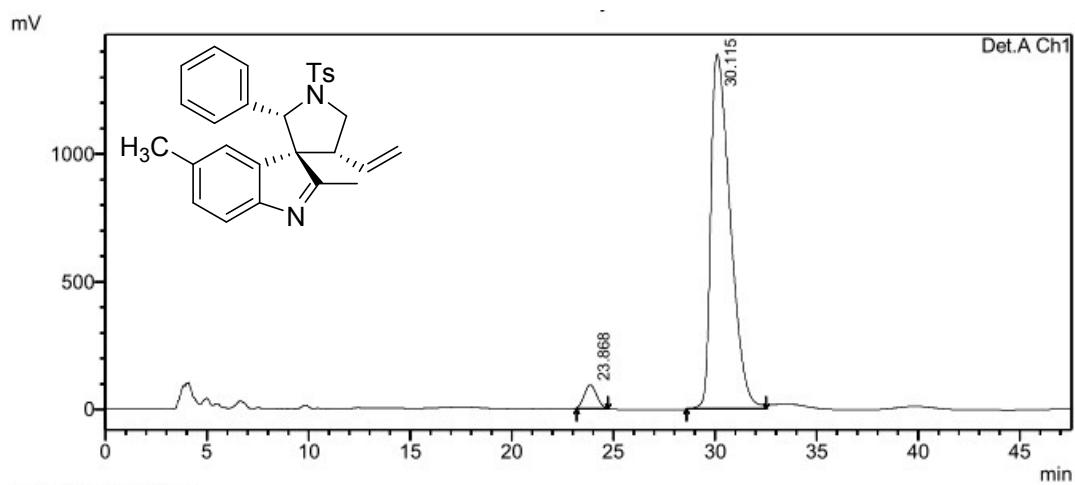

Detector A Ch1 210nm

PeakTable

| Peak# | Ret. Time | Area     | Height  | Area %  |
|-------|-----------|----------|---------|---------|
| 1     | 23.868    | 3988395  | 92997   | 4.150   |
| 2     | 30.115    | 92110069 | 1386031 | 95.850  |
| Total |           | 96098464 | 1479028 | 100.000 |

## HPLC of 3s

Conditions: Chiralpak IC column, 20% IPA in hexane,  $v = 1.0 \text{ mL/min}$ ,  $\lambda = 210 \text{ nm}$

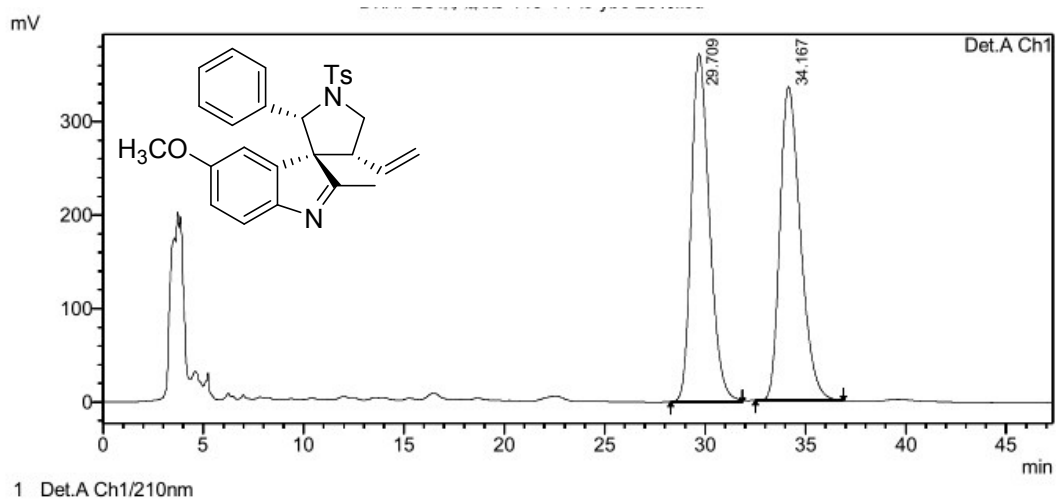

PeakTable

| Peak# | Ret. Time | Area     | Height | Area %  |
|-------|-----------|----------|--------|---------|
| 1     | 29.709    | 23538985 | 372274 | 49.582  |
| 2     | 34.167    | 23935892 | 335613 | 50.418  |
| Total |           | 47474877 | 707887 | 100.000 |

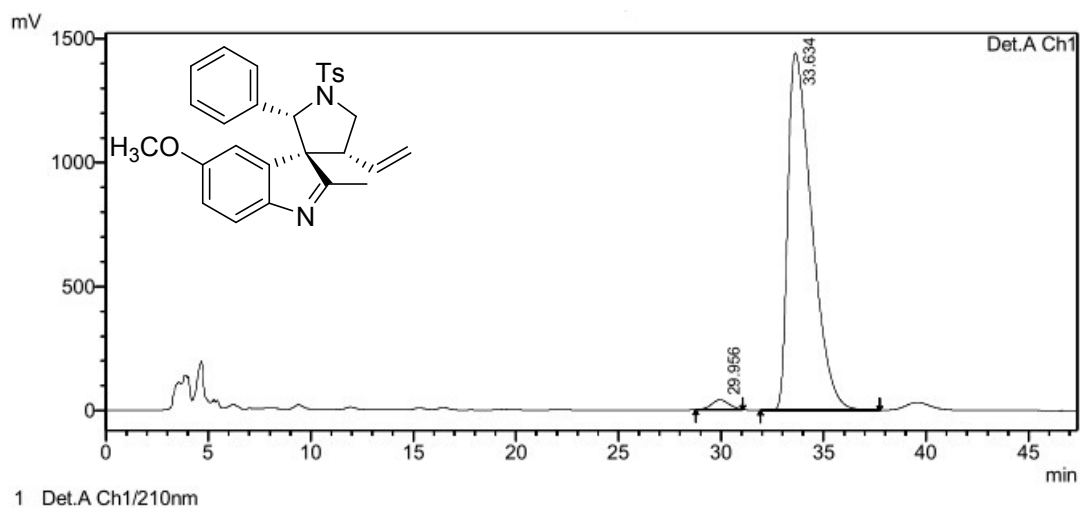

PeakTable

| Peak# | Ret. Time | Area      | Height  | Area %  |
|-------|-----------|-----------|---------|---------|
| 1     | 29.956    | 2446035   | 40077   | 2.047   |
| 2     | 33.634    | 117042530 | 1440869 | 97.953  |
| Total |           | 119488566 | 1480946 | 100.000 |

HPLC of **3t**

Conditions: Chiralpak IC column, 20% IPA in hexane,  $v= 1.0$  mL/min,  $\lambda=210$  nm

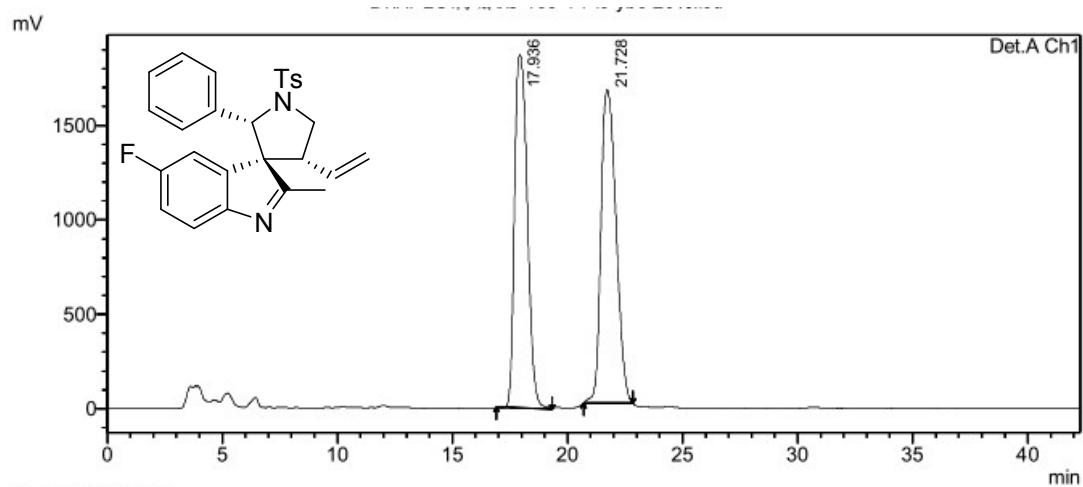

1 Det.A Ch1/210nm

PeakTable

| Peak# | Ret. Time | Area      | Height  | Area %  |
|-------|-----------|-----------|---------|---------|
| 1     | 17.936    | 72118157  | 1869560 | 48.941  |
| 2     | 21.728    | 75238195  | 1657959 | 51.059  |
| Total |           | 147356352 | 3527518 | 100.000 |

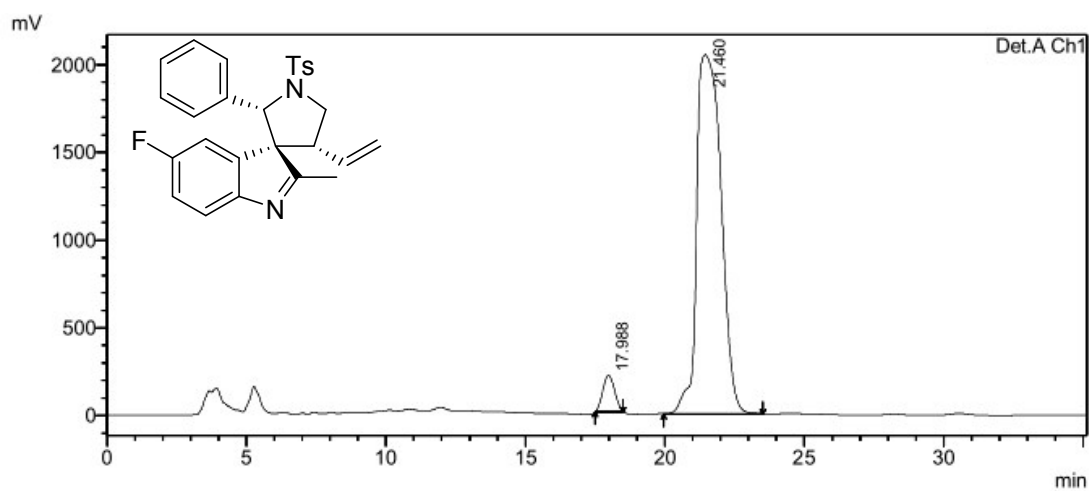

1 Det.A Ch1/210nm

PeakTable

| Peak# | Ret. Time | Area      | Height  | Area %  |
|-------|-----------|-----------|---------|---------|
| 1     | 17.988    | 6172675   | 208377  | 4.697   |
| 2     | 21.460    | 125234591 | 2048611 | 95.303  |
| Total |           | 131407265 | 2256988 | 100.000 |

HPLC of **3u**

Conditions: Chiralpak IC column, 20% IPA in hexane,  $v= 1.0 \text{ mL/min}$ ,  $\lambda=210 \text{ nm}$

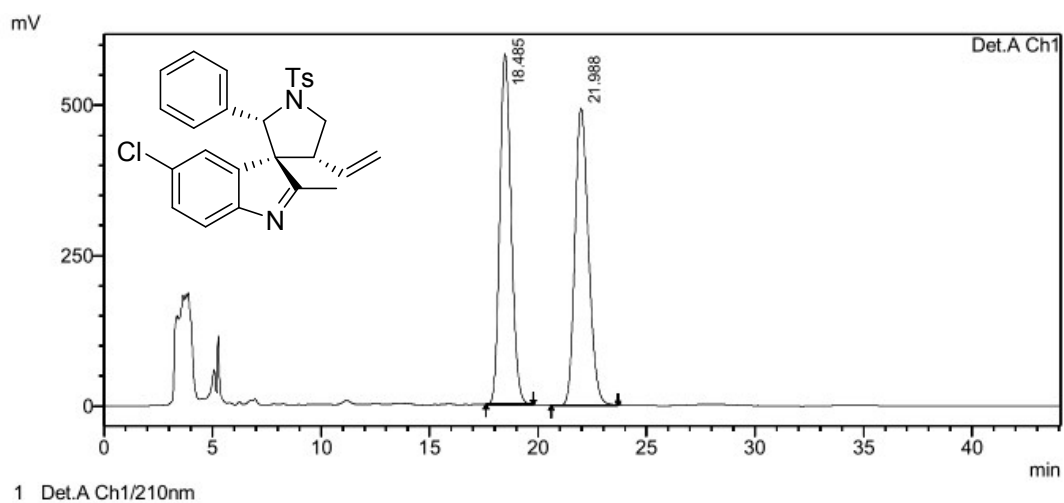

Detector A Ch1 210nm

PeakTable

| Peak# | Ret. Time | Area     | Height  | Area %  |
|-------|-----------|----------|---------|---------|
| 1     | 18.485    | 21124711 | 582665  | 49.592  |
| 2     | 21.988    | 21472459 | 494431  | 50.408  |
| Total |           | 42597170 | 1077096 | 100.000 |

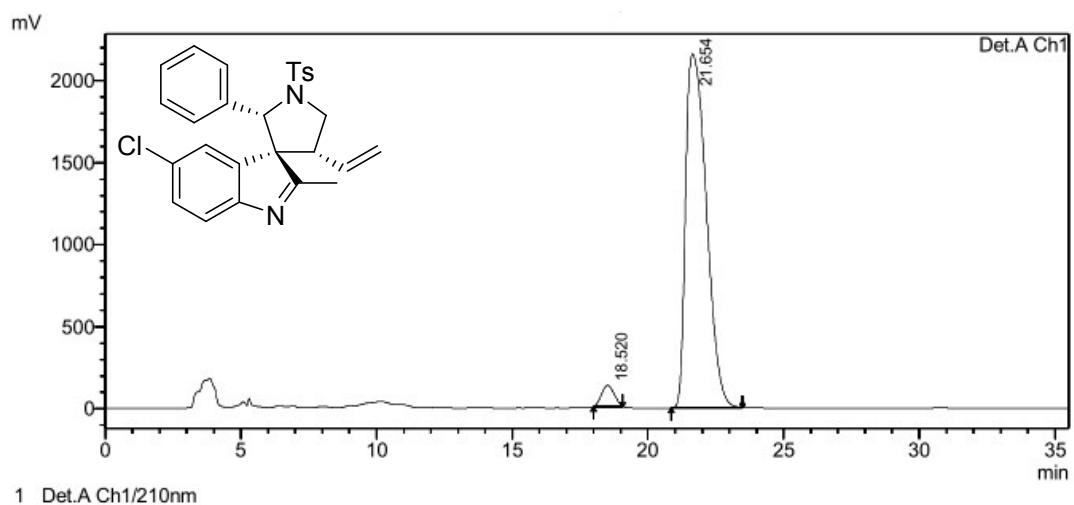

Detector A Ch1 210nm

PeakTable

| Peak# | Ret. Time | Area      | Height  | Area %  |
|-------|-----------|-----------|---------|---------|
| 1     | 18.520    | 4187290   | 128955  | 3.520   |
| 2     | 21.654    | 114768294 | 2159503 | 96.480  |
| Total |           | 118955584 | 2288458 | 100.000 |

HPLC of **3v**

Conditions: Chiralpak IC column, 20% IPA in hexane,  $v= 1.0 \text{ mL/min}$ ,  $\lambda=210 \text{ nm}$

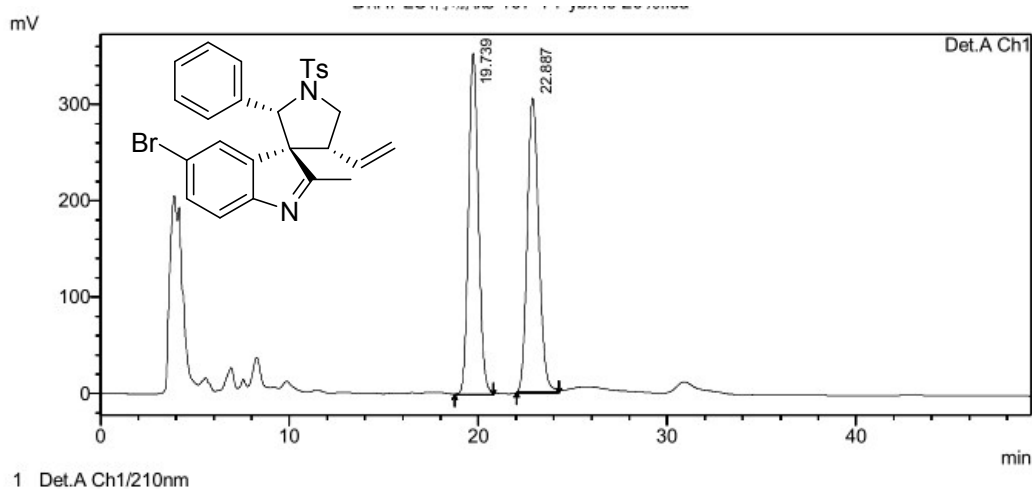

Detector A Ch1 210nm

PeakTable

| Peak# | Ret. Time | Area     | Height | Area %  |
|-------|-----------|----------|--------|---------|
| 1     | 19.739    | 12945606 | 353999 | 49.956  |
| 2     | 22.887    | 12968297 | 305712 | 50.044  |
| Total |           | 25913903 | 659711 | 100.000 |

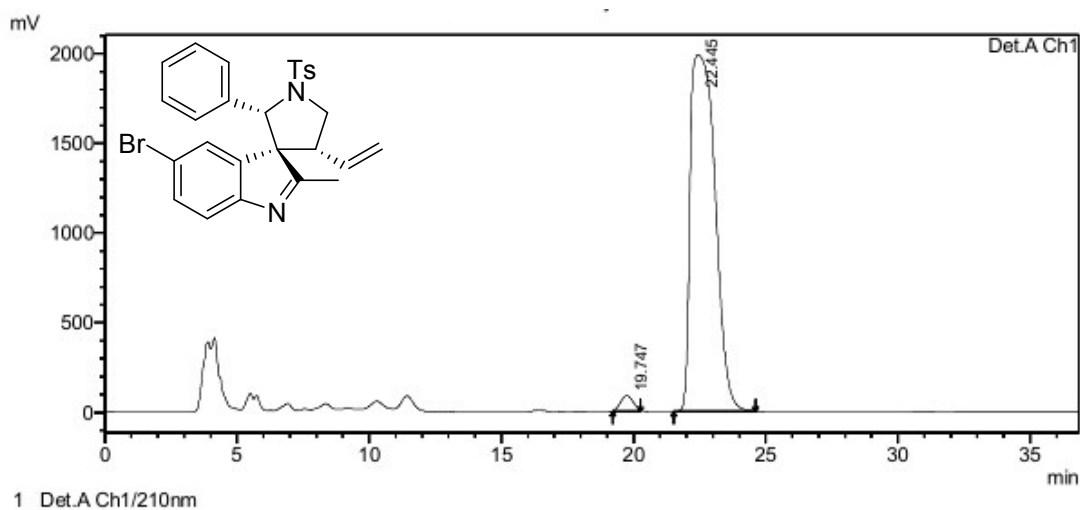

Detector A Ch1 210nm

PeakTable

| Peak# | Ret. Time | Area      | Height  | Area %  |
|-------|-----------|-----------|---------|---------|
| 1     | 19.747    | 2989276   | 88207   | 2.248   |
| 2     | 22.445    | 130003470 | 1989406 | 97.752  |
| Total |           | 132992747 | 2077613 | 100.000 |

HPLC of **3w**

Conditions: Chiralpak IC column, 20% IPA in hexane,  $v= 1.0 \text{ mL/min}$ ,  $\lambda=210 \text{ nm}$

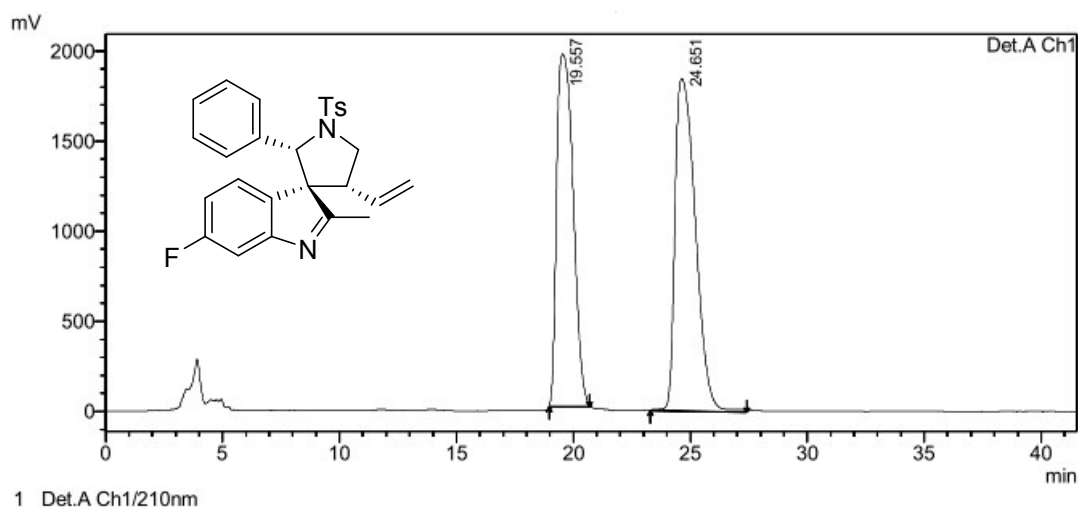

PeakTable

| Peak# | Ret. Time | Area      | Height  | Height % |
|-------|-----------|-----------|---------|----------|
| 1     | 19.557    | 96141717  | 1957316 | 51.458   |
| 2     | 24.651    | 112149712 | 1846431 | 48.542   |
| Total |           | 208291430 | 3803747 | 100.000  |

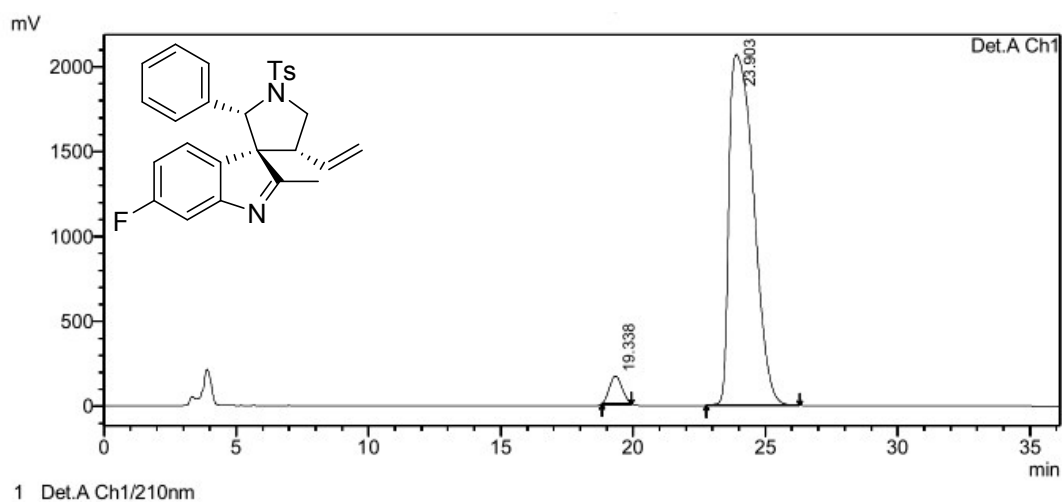

PeakTable

| Peak# | Ret. Time | Area      | Height  | Area %  |
|-------|-----------|-----------|---------|---------|
| 1     | 19.338    | 5536302   | 164575  | 3.981   |
| 2     | 23.903    | 133523761 | 2067630 | 96.019  |
| Total |           | 139060063 | 2232205 | 100.000 |

### HPLC of 3x

Conditions: Chiralpak IC column, 20% IPA in hexane,  $v= 1.0 \text{ mL/min}$ ,  $\lambda=210 \text{ nm}$

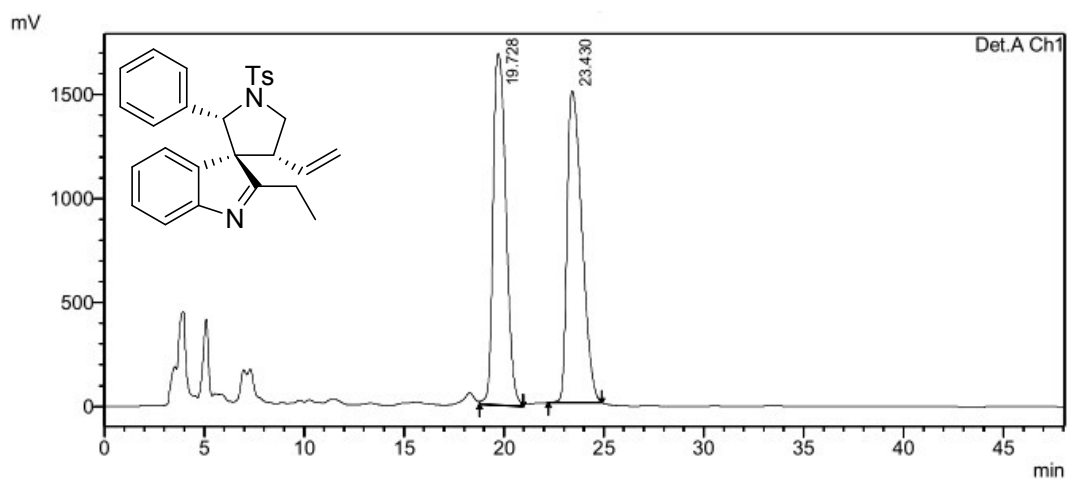

1 Det.A Ch1/210nm

PeakTable

| Peak# | Ret. Time | Area      | Height  | Area %  |
|-------|-----------|-----------|---------|---------|
| 1     | 19.728    | 75755803  | 1691812 | 49.411  |
| 2     | 23.430    | 77562564  | 1500289 | 50.589  |
| Total |           | 153318366 | 3192101 | 100.000 |

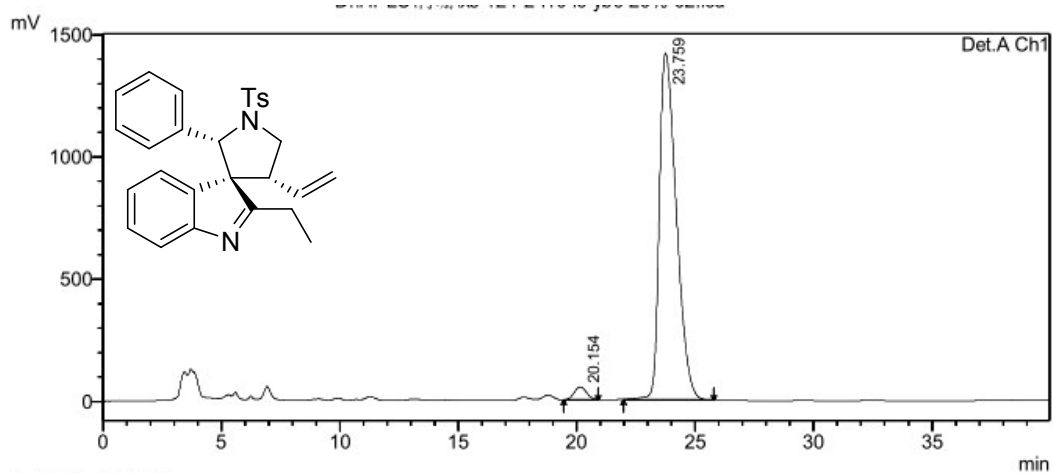

1 Det.A Ch1/210nm

PeakTable

| Peak# | Ret. Time | Area     | Height  | Area %  |
|-------|-----------|----------|---------|---------|
| 1     | 20.154    | 1918130  | 52921   | 2.639   |
| 2     | 23.759    | 70770872 | 1417686 | 97.361  |
| Total |           | 72689001 | 1470607 | 100.000 |

### HPLC of **3y**

Conditions: Chiralpak IC column, 25% IPA in hexane,  $v = 1.0$  mL/min,  $\lambda = 210$  nm

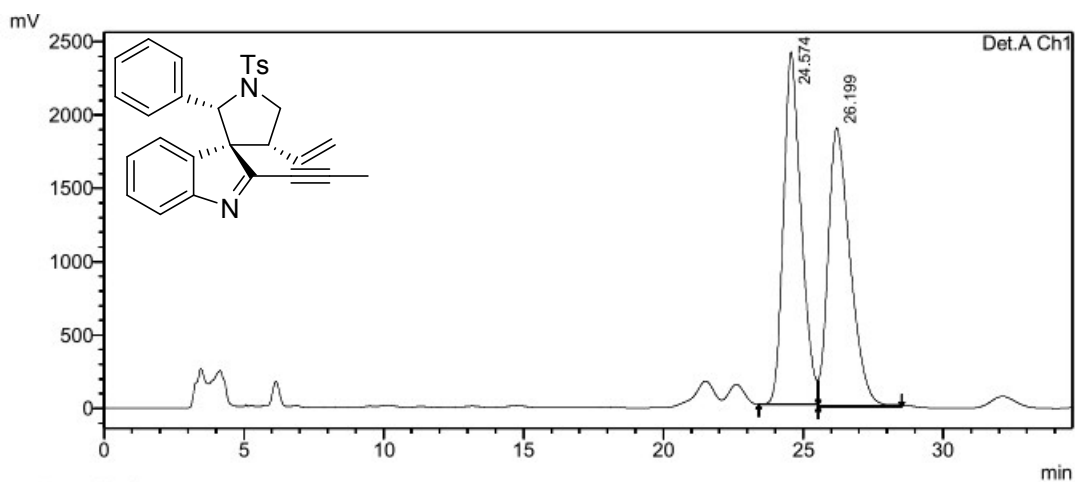

1 Det.A Ch1/210nm

PeakTable

| Peak# | Ret. Time | Area      | Height  | Area %  |
|-------|-----------|-----------|---------|---------|
| 1     | 24.574    | 105217277 | 2401098 | 50.250  |
| 2     | 26.199    | 104171234 | 1898076 | 49.750  |
| Total |           | 209388512 | 4299175 | 100.000 |

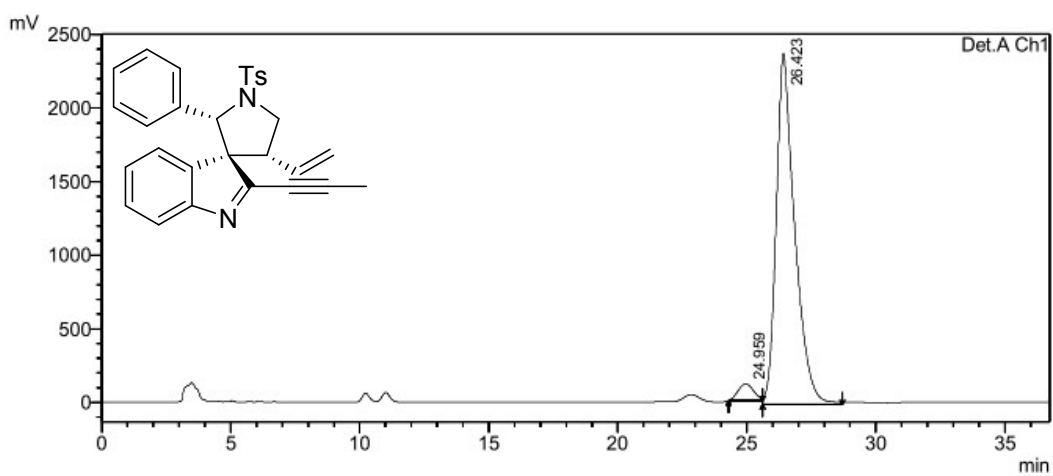

1 Det.A Ch1/210nm

PeakTable

| Peak# | Ret. Time | Area      | Height  | Area %  |
|-------|-----------|-----------|---------|---------|
| 1     | 24.959    | 4681095   | 111955  | 3.799   |
| 2     | 26.423    | 118531570 | 2384162 | 96.201  |
| Total |           | 123212665 | 2496117 | 100.000 |

### HPLC of **3z**

Conditions: Chiralpak IC column, 20% IPA in hexane,  $v = 1.0$  mL/min,  $\lambda = 210$  nm



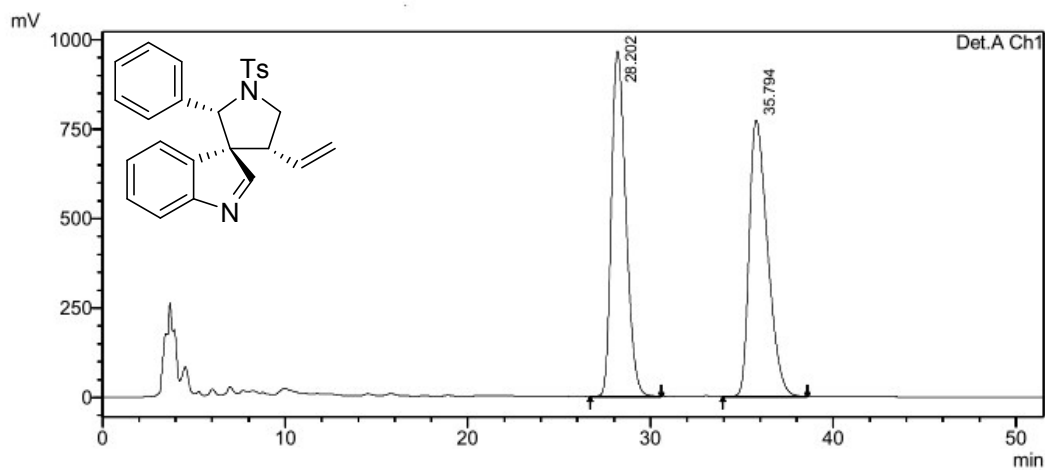

1 Det.A Ch1/210nm

PeakTable

Detector A Ch1 210nm

| Peak# | Ret. Time | Area      | Height  | Area %  |
|-------|-----------|-----------|---------|---------|
| 1     | 28.202    | 53281650  | 966578  | 49.501  |
| 2     | 35.794    | 54355219  | 773589  | 50.499  |
| Total |           | 107636869 | 1740167 | 100.000 |

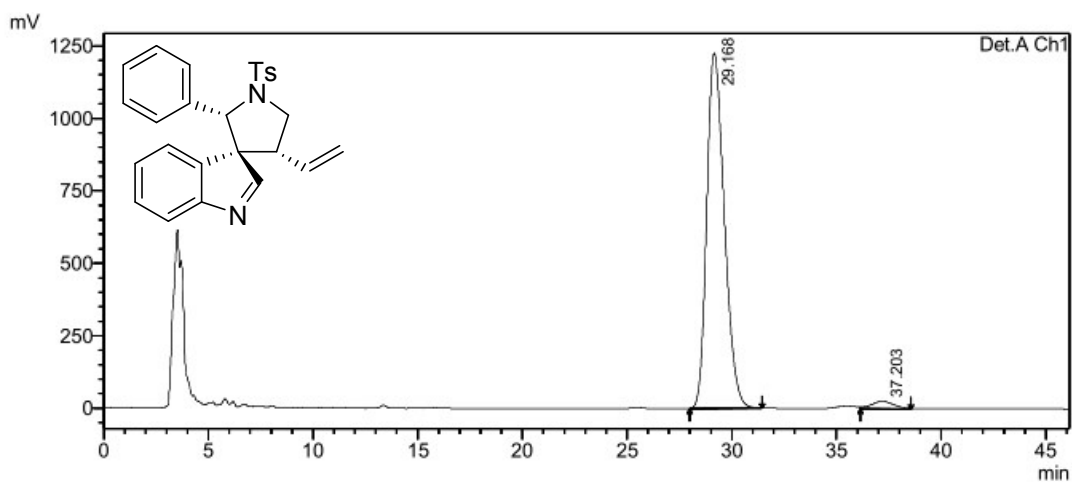

1 Det.A Ch1/210nm

PeakTable

Detector A Ch1 210nm

| Peak# | Ret. Time | Area     | Height  | Area %  |
|-------|-----------|----------|---------|---------|
| 1     | 29.168    | 71630491 | 1225865 | 97.309  |
| 2     | 37.203    | 1980982  | 25592   | 2.691   |
| Total |           | 73611473 | 1251457 | 100.000 |

## HPLC of 5z

Conditions: Chiralpak IC column, 20% IPA in hexane,  $v = 1.0$  mL/min,  $\lambda = 210$  nm

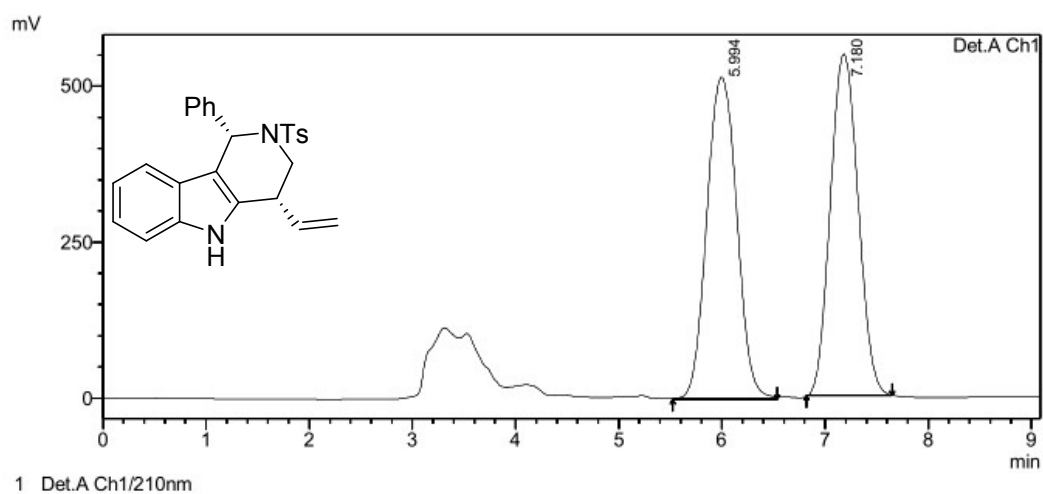

PeakTable

| Peak# | Ret. Time | Area     | Height  | Area %  |
|-------|-----------|----------|---------|---------|
| 1     | 5.994     | 10473004 | 516454  | 50.517  |
| 2     | 7.180     | 10258745 | 547202  | 49.483  |
| Total |           | 20731749 | 1063656 | 100.000 |

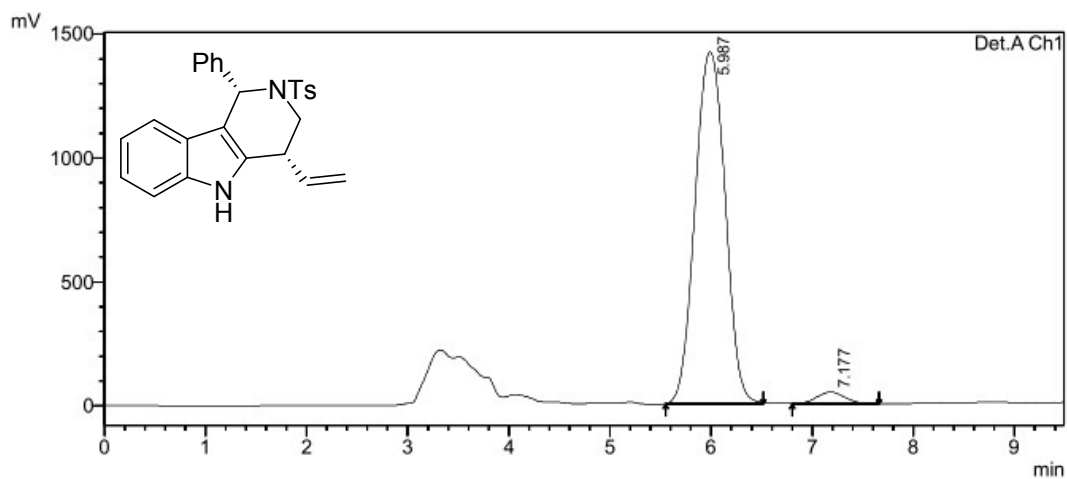

PeakTable

| Peak# | Ret. Time | Area     | Height  | Area %  |
|-------|-----------|----------|---------|---------|
| 1     | 5.987     | 29398217 | 1418648 | 97.020  |
| 2     | 7.177     | 902986   | 46758   | 2.980   |
| Total |           | 30301204 | 1465406 | 100.000 |

## HPLC of 5a

Conditions: Chiralpak IE column, 20% IPA in hexane,  $v= 1.0 \text{ mL/min}$ ,  $\lambda=210 \text{ nm}$

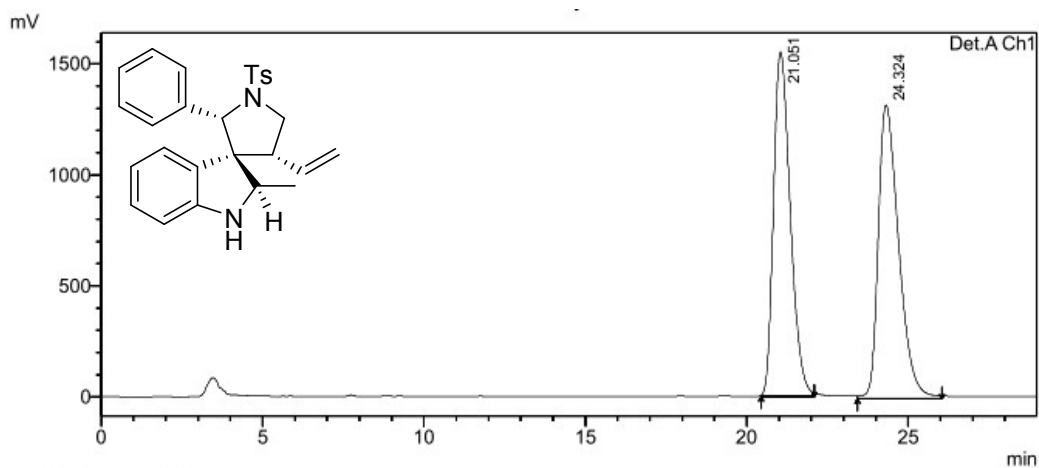

1 Det.A Ch1/210nm

PeakTable

Detector A Ch1 210nm

| Peak# | Ret. Time | Area      | Height  | Area %  |
|-------|-----------|-----------|---------|---------|
| 1     | 21.051    | 56361001  | 1552115 | 49.161  |
| 2     | 24.324    | 58285781  | 1322350 | 50.839  |
| Total |           | 114646782 | 2874465 | 100.000 |

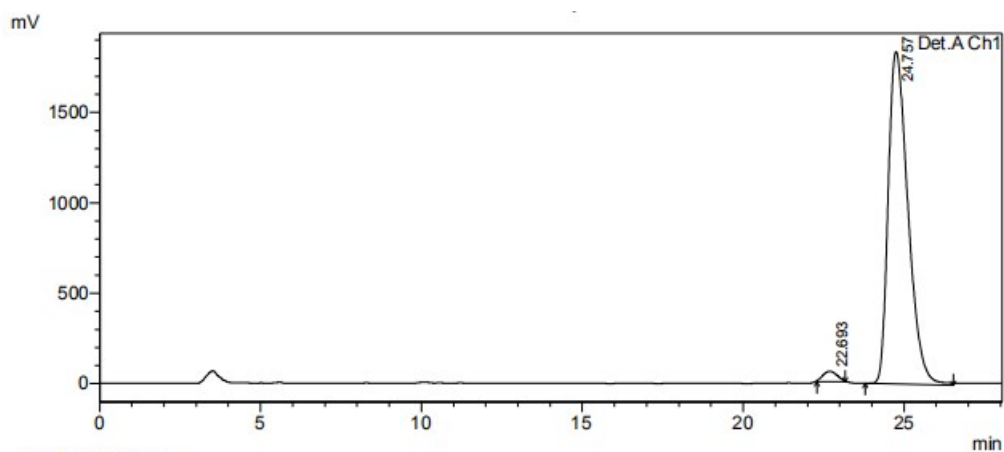

1 Det.A Ch1/210nm

PeakTable

Detector A Ch1 210nm

| Peak# | Ret. Time | Area     | Height  | Area %  |
|-------|-----------|----------|---------|---------|
| 1     | 22.693    | 1724885  | 56395   | 2.150   |
| 2     | 24.757    | 78507541 | 1838375 | 97.850  |
| Total |           | 80232426 | 1894770 | 100.000 |

## HPLC of 6a

Conditions: Chiralpak IE column, 20% IPA in hexane,  $v=1.0$  mL/min,  $\lambda=210$  nm

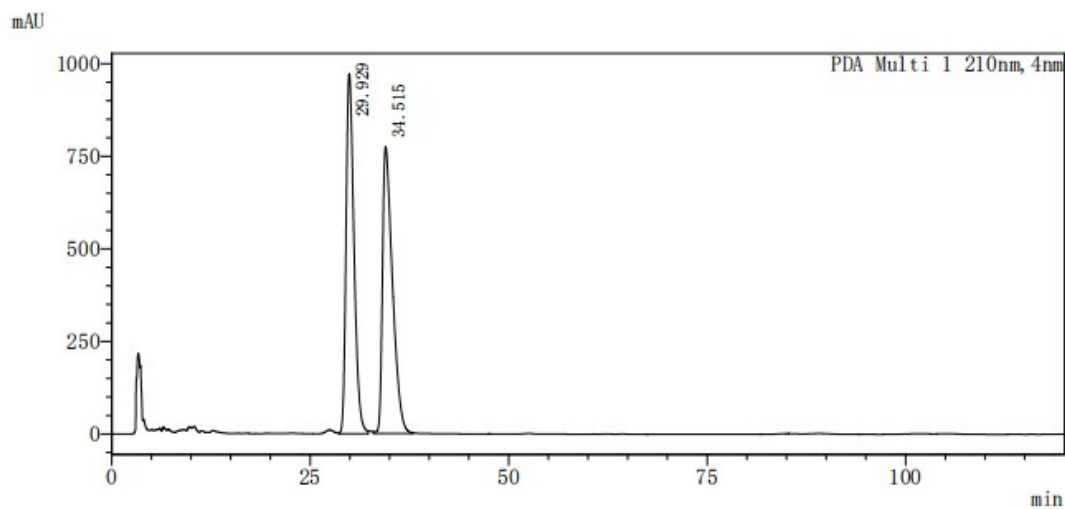

<峰表>

| 峰号 | 保留时间   | 面积        | 高度      | 标记 | 化合物名 | 面积%     |
|----|--------|-----------|---------|----|------|---------|
| 1  | 29.929 | 67546674  | 973056  | M  |      | 49.971  |
| 2  | 34.515 | 67625261  | 774144  | M  |      | 50.029  |
| 总计 |        | 135171936 | 1747200 |    |      | 100.000 |

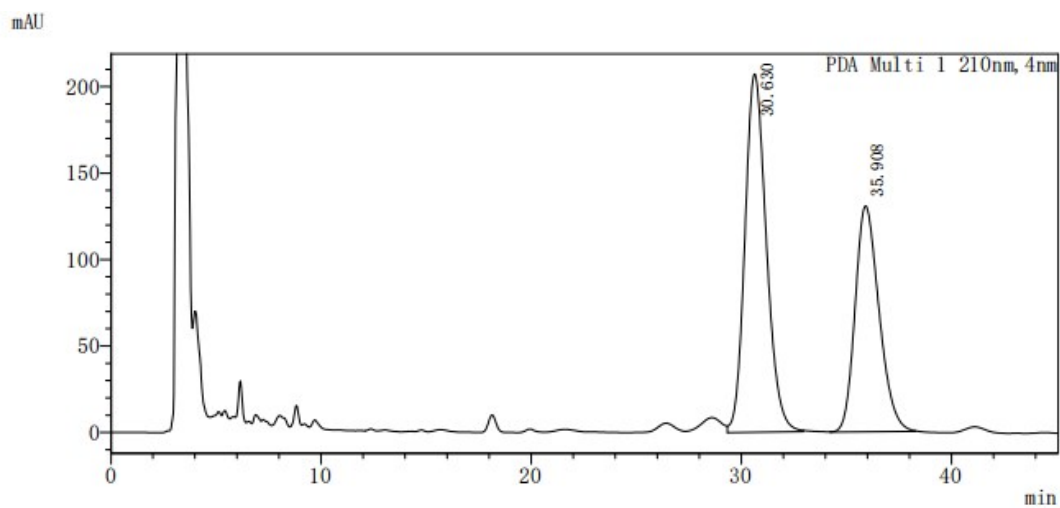

<峰表>

| 峰号 | 保留时间   | 面积       | 高度     | 标记 | 化合物名 | 面积%     |
|----|--------|----------|--------|----|------|---------|
| 1  | 30.630 | 14688312 | 207224 | M  |      | 58.616  |
| 2  | 35.908 | 10370125 | 130649 | M  |      | 41.384  |
| 总计 |        | 25058437 | 337873 |    |      | 100.000 |

## 7.X-ray crystallographic data of **3b** and **5a**

CCDC 2027183 (**3b**) and CCDC 2069356 (**5a**) contain the structure and supplementary crystallographic data. These data can be obtained free of charge on application to the Director, CCDC 12 Union Road, Cambridge CB2 1EZ, UK (fax (+44) 1223-336033; or e-mail [deposit@ccdc.cam.ac.uk](mailto:deposit@ccdc.cam.ac.uk)) or via [www.ccdc.cam.ac.uk/data\\_request/cif](http://www.ccdc.cam.ac.uk/data_request/cif).

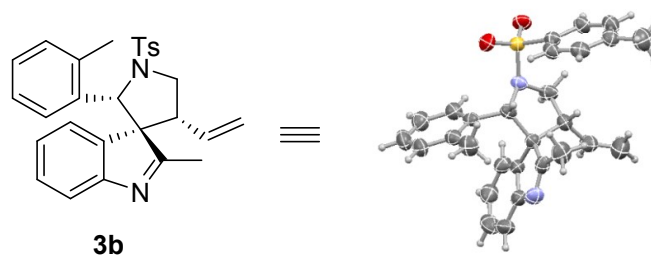

**Table S1** Crystal data and structure refinement for Compounds **3b**.

| Identification code  | <b>3b</b>                                                       | <b>5a</b>                                                       |
|----------------------|-----------------------------------------------------------------|-----------------------------------------------------------------|
| CCDC Deposit number  | 2027183                                                         | 2069356                                                         |
| Empirical formula    | C <sub>28</sub> H <sub>28</sub> N <sub>2</sub> O <sub>3</sub> S | C <sub>27</sub> H <sub>28</sub> N <sub>2</sub> O <sub>2</sub> S |
| Formula weight       | 472.60                                                          | 444.57                                                          |
| Temperature (K)      | 293(2)                                                          | 293(2)                                                          |
| Wavelength (Å)       | 0.71073                                                         | 0.71073                                                         |
| Crystal system       | orthorhombic                                                    | orthorhombic                                                    |
| space group          | P 21 21 21                                                      | P 1 21 1                                                        |
| Unit cell dimensions | a=10.783(4)                                                     | a=8.546(6)                                                      |
| Å                    | b=11.947(7)                                                     | b=14.915(10)                                                    |
|                      | c=18.807(8)                                                     | c=10.120(7)                                                     |
| (°)                  | α = 90                                                          | α = 90                                                          |
|                      | β = 90                                                          | β = 11.501(17)                                                  |
|                      | γ = 90                                                          | γ = 90                                                          |

|                                     |                       |              |
|-------------------------------------|-----------------------|--------------|
| Volume                              | 2423(2)Å <sup>3</sup> | 1192(14)     |
| Z                                   | 4                     | 2            |
| Calcd. density (Mg/m <sup>3</sup> ) | 1.257                 | 1.236        |
| F(000)                              | 968.0                 | 472.0        |
| Limiting indices                    | -10 ≤ h ≤ 12          | -10 ≤ h ≤ 10 |
|                                     | -13 ≤ k ≤ 13          | -18 ≤ k ≤ 18 |
|                                     | -22 ≤ l ≤ 21          | -12 ≤ l ≤ 12 |
| GOOF                                | 0.941                 | 1.061        |
| R(int)                              | 4.97%                 | 4.86%        |
| R <sub>1</sub>                      | 3.92%                 | 4.00%        |
| wR <sub>2</sub>                     | 9.12%                 | 9.00%        |
